# Supplementary material for: A Flexible, Natural Formulation for the Network Design Problem with Vulnerability Constraints
Source: Atypon-hosted journal article supplement (doi:10.1287/ijoc.2018.0869), 2019-07-19
Supplement: ijoc.2018.0869.sm1.xlsx [file ijoc.2018.0869.sm1.xlsx]

## Sheet: ReadMe
	Online Appendix
	Article Title: A Flexible Natural Formulation for the Network Design Problem with Vulnerability Constraints
	Authors: Okan Arslan, Ola Jabali and Gilbert Laporte
	Journal: INFORMS Journal on Computing
	There are 350 network instances used in this study. The data files are available at
	http://homepage.univie.ac.at/markus.leitner/ research/instances/NDPVC- instances.tar.gz
	This spreadsheet contains the results reported in our study.
	There are 9 settings for each of the 350 networks (3150 instances).
	The 'Results' worksheet contains the results for all 3150 instances and K = 2, 3, 4, 5 and 6 (15750 instances).
	An additional setting is tested in the study (reported in Table 7) and its results are reported in worksheet 'Table7Results'.

## Sheet: Results
Dataset Name	K	Hp	Hb	Category	Group	Status	Upper Bound	Lower Bound	isSolved	solTime	Gap	isReportedInFigure7
C10x10-10-1_10_10_20-2_5-1.dat	2	4	4	(0,0)	C-2	Optimal	324	324	1	3.26823	0	0
C10x10-10-1_10_10_20-2_5-2.dat	2	5	5	(0,0)	C-2	Optimal	320	320	1	6.88271	0	0
C10x10-10-1_10_10_20-2_5-3.dat	2	5	5	(0,0)	C-2	Optimal	344	344	1	7.34819	0	0
C10x10-10-1_10_10_20-2_5-4.dat	2	4	4	(0,0)	C-2	Optimal	267	267	1	3.79883	0	0
C10x10-10-1_10_10_20-2_5-5.dat	2	4	4	(0,0)	C-2	Optimal	232	232	1	1.96097	0	0
C10x10-10-1_10_10_20-2_7-1.dat	2	7	7	(0,0)	C-2	Optimal	362	362	1	77.6999	0	0
C10x10-10-1_10_10_20-2_7-2.dat	2	6	6	(0,0)	C-2	Optimal	352	352	1	18.9134	0	0
C10x10-10-1_10_10_20-2_7-3.dat	2	6	6	(0,0)	C-2	Optimal	356	356	1	11.2438	0	0
C10x10-10-1_10_10_20-2_7-4.dat	2	6	6	(0,0)	C-2	Optimal	414	414	1	16.6926	0	0
C10x10-10-1_10_10_20-2_7-5.dat	2	6	6	(0,0)	C-2	Optimal	356	356	1	22.0122	0	0
C10x10-10-1_10_10_50-2_5-1.dat	2	5	5	(0,0)	C-2	Optimal	294	294	1	4.05637	0	0
C10x10-10-1_10_10_50-2_5-2.dat	2	4	4	(0,0)	C-2	Optimal	426	426	1	2.03462	0	0
C10x10-10-1_10_10_50-2_5-3.dat	2	5	5	(0,0)	C-2	Optimal	352	352	1	6.16065	0	0
C10x10-10-1_10_10_50-2_5-4.dat	2	4	4	(0,0)	C-2	Optimal	319	319	1	1.97551	0	0
C10x10-10-1_10_10_50-2_5-5.dat	2	4	4	(0,0)	C-2	Optimal	551	551	1	1.73244	0	0
C10x10-10-1_10_10_50-2_7-1.dat	2	7	7	(0,0)	C-2	Optimal	341	341	1	23.1376	0	0
C10x10-10-1_10_10_50-2_7-2.dat	2	6	6	(0,0)	C-2	Optimal	342	342	1	11.7982	0	0
C10x10-10-1_10_10_50-2_7-3.dat	2	7	7	(0,0)	C-2	Optimal	308	308	1	26.4336	0	0
C10x10-10-1_10_10_50-2_7-4.dat	2	7	7	(0,0)	C-2	Optimal	332	332	1	27.4882	0	0
C10x10-10-1_10_10_50-2_7-5.dat	2	6	6	(0,0)	C-2	Optimal	574	574	1	7.70358	0	0
C10x10-5-1_10_10_20-2_5-1.dat	2	3	3	(0,0)	C-1	Optimal	179	179	1	0.188726	0	0
C10x10-5-1_10_10_20-2_5-2.dat	2	4	4	(0,0)	C-1	Optimal	241	241	1	1.11363	0	0
C10x10-5-1_10_10_20-2_5-3.dat	2	4	4	(0,0)	C-1	Optimal	246	246	1	0.834556	0	0
C10x10-5-1_10_10_20-2_5-4.dat	2	4	4	(0,0)	C-1	Optimal	170	170	1	1.00232	0	0
C10x10-5-1_10_10_20-2_5-5.dat	2	4	4	(0,0)	C-1	Optimal	180	180	1	0.629058	0	0
C10x10-5-1_10_10_20-2_7-1.dat	2	7	7	(0,0)	C-1	Optimal	178	178	1	18.0114	0	0
C10x10-5-1_10_10_20-2_7-2.dat	2	6	6	(0,0)	C-1	Optimal	181	181	1	9.07963	0	0
C10x10-5-1_10_10_20-2_7-3.dat	2	5	5	(0,0)	C-1	Optimal	245	245	1	3.10389	0	0
C10x10-5-1_10_10_20-2_7-4.dat	2	5	5	(0,0)	C-1	Optimal	218	218	1	3.66195	0	0
C10x10-5-1_10_10_20-2_7-5.dat	2	6	6	(0,0)	C-1	Optimal	189	189	1	6.17816	0	0
C10x10-5-1_10_10_50-2_5-1.dat	2	5	5	(0,0)	C-1	Optimal	173	173	1	2.43467	0	0
C10x10-5-1_10_10_50-2_5-2.dat	2	3	3	(0,0)	C-1	Optimal	364	364	1	0.17206	0	0
C10x10-5-1_10_10_50-2_5-3.dat	2	3	3	(0,0)	C-1	Optimal	231	231	1	0.17483	0	0
C10x10-5-1_10_10_50-2_5-4.dat	2	5	5	(0,0)	C-1	Optimal	253	253	1	4.8864	0	0
C10x10-5-1_10_10_50-2_5-5.dat	2	4	4	(0,0)	C-1	Optimal	210	210	1	1.17358	0	0
C10x10-5-1_10_10_50-2_7-1.dat	2	5	5	(0,0)	C-1	Optimal	236	236	1	2.47961	0	0
C10x10-5-1_10_10_50-2_7-2.dat	2	6	6	(0,0)	C-1	Optimal	219	219	1	10.3038	0	0
C10x10-5-1_10_10_50-2_7-3.dat	2	6	6	(0,0)	C-1	Optimal	311	311	1	9.10977	0	0
C10x10-5-1_10_10_50-2_7-4.dat	2	5	5	(0,0)	C-1	Optimal	276	276	1	3.26614	0	0
C10x10-5-1_10_10_50-2_7-5.dat	2	4	4	(0,0)	C-1	Optimal	335	335	1	1.23429	0	0
C20x20-10-1_10_10_20-2_5-1.dat	2	5	5	(0,0)	C-4	Optimal	357	357	1	7.14321	0	0
C20x20-10-1_10_10_20-2_5-2.dat	2	4	4	(0,0)	C-4	Optimal	359	359	1	2.13038	0	0
C20x20-10-1_10_10_20-2_5-3.dat	2	5	5	(0,0)	C-4	Optimal	421	421	1	10.3621	0	0
C20x20-10-1_10_10_20-2_5-4.dat	2	5	5	(0,0)	C-4	Optimal	430	430	1	12.3269	0	0
C20x20-10-1_10_10_20-2_5-5.dat	2	4	4	(0,0)	C-4	Optimal	396	396	1	3.34169	0	0
C20x20-10-1_10_10_20-2_7-1.dat	2	7	7	(0,0)	C-4	Optimal	466	466	1	30.1205	0	0
C20x20-10-1_10_10_20-2_7-2.dat	2	5	5	(0,0)	C-4	Optimal	553	553	1	4.28734	0	0
C20x20-10-1_10_10_20-2_7-3.dat	2	5	5	(0,0)	C-4	Optimal	443	443	1	6.85947	0	0
C20x20-10-1_10_10_20-2_7-4.dat	2	6	6	(0,0)	C-4	Optimal	433	433	1	17.2136	0	0
C20x20-10-1_10_10_20-2_7-5.dat	2	6	6	(0,0)	C-4	Optimal	349	349	1	23.8976	0	0
C20x20-10-1_10_10_50-2_5-1.dat	2	5	5	(0,0)	C-4	Optimal	391	391	1	6.86952	0	0
C20x20-10-1_10_10_50-2_5-2.dat	2	4	4	(0,0)	C-4	Optimal	418	418	1	2.37054	0	0
C20x20-10-1_10_10_50-2_5-3.dat	2	5	5	(0,0)	C-4	Optimal	452	452	1	10.4035	0	0
C20x20-10-1_10_10_50-2_5-4.dat	2	5	5	(0,0)	C-4	Optimal	458	458	1	8.31914	0	0
C20x20-10-1_10_10_50-2_5-5.dat	2	4	4	(0,0)	C-4	Optimal	496	496	1	2.03774	0	0
C20x20-10-1_10_10_50-2_7-1.dat	2	5	5	(0,0)	C-4	Optimal	525	525	1	6.85294	0	0
C20x20-10-1_10_10_50-2_7-2.dat	2	5	5	(0,0)	C-4	Optimal	621	621	1	10.4932	0	0
C20x20-10-1_10_10_50-2_7-3.dat	2	6	6	(0,0)	C-4	Optimal	553	553	1	24.9082	0	0
C20x20-10-1_10_10_50-2_7-4.dat	2	5	5	(0,0)	C-4	Optimal	485	485	1	6.9968	0	0
C20x20-10-1_10_10_50-2_7-5.dat	2	5	5	(0,0)	C-4	Optimal	427	427	1	9.91964	0	0
C20x20-20-1_10_10_20-2_5-1.dat	2	5	5	(0,0)	C-5	Optimal	689	689	1	18.7812	0	0
C20x20-20-1_10_10_20-2_5-2.dat	2	5	5	(0,0)	C-5	Optimal	715	715	1	14.2622	0	0
C20x20-20-1_10_10_20-2_5-3.dat	2	5	5	(0,0)	C-5	Optimal	698	698	1	19.2042	0	0
C20x20-20-1_10_10_20-2_5-4.dat	2	5	5	(0,0)	C-5	Optimal	739	739	1	17.3806	0	0
C20x20-20-1_10_10_20-2_5-5.dat	2	5	5	(0,0)	C-5	Optimal	795	795	1	17.582	0	0
C20x20-20-1_10_10_20-2_7-1.dat	2	7	7	(0,0)	C-5	Optimal	858	858	1	130.426	0	0
C20x20-20-1_10_10_20-2_7-2.dat	2	6	6	(0,0)	C-5	Optimal	793	793	1	37.4226	0	0
C20x20-20-1_10_10_20-2_7-3.dat	2	7	7	(0,0)	C-5	Optimal	905	905	1	103.296	0	0
C20x20-20-1_10_10_20-2_7-4.dat	2	7	7	(0,0)	C-5	Optimal	699	699	1	100.138	0	0
C20x20-20-1_10_10_20-2_7-5.dat	2	6	6	(0,0)	C-5	Optimal	829	829	1	30.0911	0	0
C20x20-20-1_10_10_50-2_5-1.dat	2	5	5	(0,0)	C-5	Optimal	754	754	1	11.1791	0	0
C20x20-20-1_10_10_50-2_5-2.dat	2	5	5	(0,0)	C-5	Optimal	858	858	1	16.89	0	0
C20x20-20-1_10_10_50-2_5-3.dat	2	5	5	(0,0)	C-5	Optimal	704	704	1	13.5626	0	0
C20x20-20-1_10_10_50-2_5-4.dat	2	4	4	(0,0)	C-5	Optimal	940	940	1	5.16788	0	0
C20x20-20-1_10_10_50-2_5-5.dat	2	5	5	(0,0)	C-5	Optimal	721	721	1	17.9774	0	0
C20x20-20-1_10_10_50-2_7-1.dat	2	6	6	(0,0)	C-5	Optimal	963	963	1	46.1745	0	0
C20x20-20-1_10_10_50-2_7-2.dat	2	7	7	(0,0)	C-5	Optimal	822	822	1	61.1054	0	0
C20x20-20-1_10_10_50-2_7-3.dat	2	7	7	(0,0)	C-5	Optimal	917	917	1	81.1935	0	0
C20x20-20-1_10_10_50-2_7-4.dat	2	6	6	(0,0)	C-5	Optimal	1086	1086	1	22.4279	0	0
C20x20-20-1_10_10_50-2_7-5.dat	2	7	7	(0,0)	C-5	Optimal	712	712	1	48.5061	0	0
C20x20-5-1_10_10_20-2_5-1.dat	2	4	4	(0,0)	C-3	Optimal	192	192	1	2.32801	0	0
C20x20-5-1_10_10_20-2_5-2.dat	2	3	3	(0,0)	C-3	Optimal	225	225	1	0.223107	0	0
C20x20-5-1_10_10_20-2_5-3.dat	2	4	4	(0,0)	C-3	Optimal	220	220	1	1.19058	0	0
C20x20-5-1_10_10_20-2_5-4.dat	2	4	4	(0,0)	C-3	Optimal	254	254	1	1.08784	0	0
C20x20-5-1_10_10_20-2_5-5.dat	2	4	4	(0,0)	C-3	Optimal	221	221	1	0.838135	0	0
C20x20-5-1_10_10_20-2_7-1.dat	2	7	7	(0,0)	C-3	Optimal	203	203	1	12.0479	0	0
C20x20-5-1_10_10_20-2_7-2.dat	2	6	6	(0,0)	C-3	Optimal	251	251	1	11.3091	0	0
C20x20-5-1_10_10_20-2_7-3.dat	2	6	6	(0,0)	C-3	Optimal	235	235	1	7.33726	0	0
C20x20-5-1_10_10_20-2_7-4.dat	2	7	7	(0,0)	C-3	Optimal	225	225	1	14.7048	0	0
C20x20-5-1_10_10_20-2_7-5.dat	2	6	6	(0,0)	C-3	Optimal	220	220	1	15.1482	0	0
C20x20-5-1_10_10_50-2_5-1.dat	2	3	3	(0,0)	C-3	Optimal	374	374	1	0.285298	0	0
C20x20-5-1_10_10_50-2_5-2.dat	2	4	4	(0,0)	C-3	Optimal	300	300	1	1.28833	0	0
C20x20-5-1_10_10_50-2_5-3.dat	2	5	5	(0,0)	C-3	Optimal	277	277	1	3.85992	0	0
C20x20-5-1_10_10_50-2_5-4.dat	2	3	3	(0,0)	C-3	Optimal	263	263	1	0.23619	0	0
C20x20-5-1_10_10_50-2_5-5.dat	2	4	4	(0,0)	C-3	Optimal	339	339	1	1.16377	0	0
C20x20-5-1_10_10_50-2_7-1.dat	2	5	5	(0,0)	C-3	Optimal	309	309	1	5.53454	0	0
C20x20-5-1_10_10_50-2_7-2.dat	2	3	3	(0,0)	C-3	Optimal	270	270	1	0.27892	0	0
C20x20-5-1_10_10_50-2_7-3.dat	2	7	7	(0,0)	C-3	Optimal	356	356	1	20.4045	0	0
C20x20-5-1_10_10_50-2_7-4.dat	2	5	5	(0,0)	C-3	Optimal	304	304	1	5.27175	0	0
C20x20-5-1_10_10_50-2_7-5.dat	2	4	4	(0,0)	C-3	Optimal	247	247	1	1.19991	0	0
C30x30-10-1_10_10_20-2_5-1.dat	2	5	5	(0,0)	C-7	Optimal	431	431	1	9.46336	0	0
C30x30-10-1_10_10_20-2_5-2.dat	2	5	5	(0,0)	C-7	Optimal	411	411	1	10.1887	0	0
C30x30-10-1_10_10_20-2_5-3.dat	2	5	5	(0,0)	C-7	Optimal	386	386	1	10.2588	0	0
C30x30-10-1_10_10_20-2_5-4.dat	2	5	5	(0,0)	C-7	Optimal	438	438	1	11.5437	0	0
C30x30-10-1_10_10_20-2_5-5.dat	2	4	4	(0,0)	C-7	Optimal	456	456	1	2.61256	0	0
C30x30-10-1_10_10_20-2_7-1.dat	2	5	5	(0,0)	C-7	Optimal	533	533	1	8.71527	0	0
C30x30-10-1_10_10_20-2_7-2.dat	2	5	5	(0,0)	C-7	Optimal	496	496	1	8.32352	0	0
C30x30-10-1_10_10_20-2_7-3.dat	2	7	7	(0,0)	C-7	Optimal	555	555	1	68.2077	0	0
C30x30-10-1_10_10_20-2_7-4.dat	2	7	7	(0,0)	C-7	Optimal	472	472	1	51.0241	0	0
C30x30-10-1_10_10_20-2_7-5.dat	2	6	6	(0,0)	C-7	Optimal	536	536	1	19.3781	0	0
C30x30-10-1_10_10_50-2_5-1.dat	2	4	4	(0,0)	C-7	Optimal	420	420	1	2.7629	0	0
C30x30-10-1_10_10_50-2_5-2.dat	2	4	4	(0,0)	C-7	Optimal	553	553	1	2.52026	0	0
C30x30-10-1_10_10_50-2_5-3.dat	2	5	5	(0,0)	C-7	Optimal	438	438	1	9.27723	0	0
C30x30-10-1_10_10_50-2_5-4.dat	2	5	5	(0,0)	C-7	Optimal	430	430	1	8.23883	0	0
C30x30-10-1_10_10_50-2_5-5.dat	2	4	4	(0,0)	C-7	Optimal	516	516	1	2.80892	0	0
C30x30-10-1_10_10_50-2_7-1.dat	2	7	7	(0,0)	C-7	Optimal	486	486	1	37.0608	0	0
C30x30-10-1_10_10_50-2_7-2.dat	2	6	6	(0,0)	C-7	Optimal	604	604	1	14.1584	0	0
C30x30-10-1_10_10_50-2_7-3.dat	2	7	7	(0,0)	C-7	Optimal	550	550	1	28.3042	0	0
C30x30-10-1_10_10_50-2_7-4.dat	2	6	6	(0,0)	C-7	Optimal	746	746	1	16.247	0	0
C30x30-10-1_10_10_50-2_7-5.dat	2	6	6	(0,0)	C-7	Optimal	575	575	1	24.2104	0	0
C30x30-20-1_10_10_20-2_5-1.dat	2	5	5	(0,0)	C-8	Optimal	770	770	1	18.0846	0	0
C30x30-20-1_10_10_20-2_5-2.dat	2	5	5	(0,0)	C-8	Optimal	604	604	1	18.6221	0	0
C30x30-20-1_10_10_20-2_5-3.dat	2	4	4	(0,0)	C-8	Optimal	814	814	1	5.85706	0	0
C30x30-20-1_10_10_20-2_5-4.dat	2	4	4	(0,0)	C-8	Optimal	732	732	1	4.86121	0	0
C30x30-20-1_10_10_20-2_5-5.dat	2	4	4	(0,0)	C-8	Optimal	689	689	1	5.47961	0	0
C30x30-20-1_10_10_20-2_7-1.dat	2	7	7	(0,0)	C-8	Optimal	878	878	1	74.5148	0	0
C30x30-20-1_10_10_20-2_7-2.dat	2	6	6	(0,0)	C-8	Optimal	848	848	1	38.8699	0	0
C30x30-20-1_10_10_20-2_7-3.dat	2	7	7	(0,0)	C-8	Optimal	862	862	1	60.016	0	0
C30x30-20-1_10_10_20-2_7-4.dat	2	7	7	(0,0)	C-8	Optimal	941	941	1	100.292	0	0
C30x30-20-1_10_10_20-2_7-5.dat	2	6	6	(0,0)	C-8	Optimal	1014	1014	1	48.8077	0	0
C30x30-20-1_10_10_50-2_5-1.dat	2	5	5	(0,0)	C-8	Optimal	751	751	1	15.8335	0	0
C30x30-20-1_10_10_50-2_5-2.dat	2	5	5	(0,0)	C-8	Optimal	844	844	1	16.3862	0	0
C30x30-20-1_10_10_50-2_5-3.dat	2	4	4	(0,0)	C-8	Optimal	1108	1108	1	4.78178	0	0
C30x30-20-1_10_10_50-2_5-4.dat	2	5	5	(0,0)	C-8	Optimal	717	717	1	18.6342	0	0
C30x30-20-1_10_10_50-2_5-5.dat	2	5	5	(0,0)	C-8	Optimal	1035	1035	1	19.8143	0	0
C30x30-20-1_10_10_50-2_7-1.dat	2	6	6	(0,0)	C-8	Optimal	997	997	1	46.086	0	0
C30x30-20-1_10_10_50-2_7-2.dat	2	6	6	(0,0)	C-8	Optimal	920	920	1	49.1074	0	0
C30x30-20-1_10_10_50-2_7-3.dat	2	7	7	(0,0)	C-8	Optimal	938	938	1	87.934	0	0
C30x30-20-1_10_10_50-2_7-4.dat	2	7	7	(0,0)	C-8	Optimal	966	966	1	84.4384	0	0
C30x30-20-1_10_10_50-2_7-5.dat	2	7	7	(0,0)	C-8	Optimal	895	895	1	74.0862	0	0
C30x30-30-1_10_10_20-2_5-1.dat	2	5	5	(0,0)	C-9	Optimal	1161	1161	1	32.678	0	0
C30x30-30-1_10_10_20-2_5-2.dat	2	5	5	(0,0)	C-9	Optimal	1026	1026	1	33.074	0	0
C30x30-30-1_10_10_20-2_5-3.dat	2	5	5	(0,0)	C-9	Optimal	975	975	1	33.5702	0	0
C30x30-30-1_10_10_20-2_5-4.dat	2	5	5	(0,0)	C-9	Optimal	1022	1022	1	29.7248	0	0
C30x30-30-1_10_10_20-2_5-5.dat	2	5	5	(0,0)	C-9	Optimal	1027	1027	1	27.6131	0	0
C30x30-30-1_10_10_20-2_7-1.dat	2	7	7	(0,0)	C-9	Optimal	1173	1173	1	137.026	0	0
C30x30-30-1_10_10_20-2_7-2.dat	2	7	7	(0,0)	C-9	Optimal	1302	1302	1	120.103	0	0
C30x30-30-1_10_10_20-2_7-3.dat	2	7	7	(0,0)	C-9	Optimal	1404	1404	1	156.618	0	0
C30x30-30-1_10_10_20-2_7-4.dat	2	7	7	(0,0)	C-9	Optimal	1422	1422	1	160.673	0	0
C30x30-30-1_10_10_20-2_7-5.dat	2	6	6	(0,0)	C-9	Optimal	1291	1291	1	55.0434	0	0
C30x30-30-1_10_10_50-2_5-1.dat	2	5	5	(0,0)	C-9	Optimal	1092	1092	1	27.4116	0	0
C30x30-30-1_10_10_50-2_5-2.dat	2	5	5	(0,0)	C-9	Optimal	1008	1008	1	29.492	0	0
C30x30-30-1_10_10_50-2_5-3.dat	2	4	4	(0,0)	C-9	Optimal	1444	1444	1	6.11639	0	0
C30x30-30-1_10_10_50-2_5-4.dat	2	5	5	(0,0)	C-9	Optimal	1125	1125	1	22.906	0	0
C30x30-30-1_10_10_50-2_5-5.dat	2	5	5	(0,0)	C-9	Optimal	1077	1077	1	23.8676	0	0
C30x30-30-1_10_10_50-2_7-1.dat	2	7	7	(0,0)	C-9	Optimal	1205	1205	1	120.308	0	0
C30x30-30-1_10_10_50-2_7-2.dat	2	7	7	(0,0)	C-9	Optimal	1189	1189	1	108.756	0	0
C30x30-30-1_10_10_50-2_7-3.dat	2	7	7	(0,0)	C-9	Optimal	1426	1426	1	107.772	0	0
C30x30-30-1_10_10_50-2_7-4.dat	2	7	7	(0,0)	C-9	Optimal	1163	1163	1	120.572	0	0
C30x30-30-1_10_10_50-2_7-5.dat	2	7	7	(0,0)	C-9	Optimal	1207	1207	1	125.964	0	0
C30x30-5-1_10_10_20-2_5-1.dat	2	4	4	(0,0)	C-6	Optimal	173	173	1	1.56665	0	0
C30x30-5-1_10_10_20-2_5-2.dat	2	4	4	(0,0)	C-6	Optimal	207	207	1	1.91663	0	0
C30x30-5-1_10_10_20-2_5-3.dat	2	4	4	(0,0)	C-6	Optimal	177	177	1	1.64526	0	0
C30x30-5-1_10_10_20-2_5-4.dat	2	3	3	(0,0)	C-6	Optimal	191	191	1	0.557661	0	0
C30x30-5-1_10_10_20-2_5-5.dat	2	4	4	(0,0)	C-6	Optimal	201	201	1	2.26851	0	0
C30x30-5-1_10_10_20-2_7-1.dat	2	4	4	(0,0)	C-6	Optimal	169	169	1	1.24018	0	0
C30x30-5-1_10_10_20-2_7-2.dat	2	5	5	(0,0)	C-6	Optimal	275	275	1	2.42025	0	0
C30x30-5-1_10_10_20-2_7-3.dat	2	6	6	(0,0)	C-6	Optimal	297	297	1	10.3532	0	0
C30x30-5-1_10_10_20-2_7-4.dat	2	6	6	(0,0)	C-6	Optimal	243	243	1	12.3437	0	0
C30x30-5-1_10_10_20-2_7-5.dat	2	5	5	(0,0)	C-6	Optimal	211	211	1	3.69586	0	0
C30x30-5-1_10_10_50-2_5-1.dat	2	3	3	(0,0)	C-6	Optimal	294	294	1	0.614215	0	0
C30x30-5-1_10_10_50-2_5-2.dat	2	4	4	(0,0)	C-6	Optimal	370	370	1	1.03247	0	0
C30x30-5-1_10_10_50-2_5-3.dat	2	4	4	(0,0)	C-6	Optimal	329	329	1	1.71337	0	0
C30x30-5-1_10_10_50-2_5-4.dat	2	3	3	(0,0)	C-6	Optimal	490	490	1	0.404584	0	0
C30x30-5-1_10_10_50-2_5-5.dat	2	4	4	(0,0)	C-6	Optimal	235	235	1	2.05448	0	0
C30x30-5-1_10_10_50-2_7-1.dat	2	7	7	(0,0)	C-6	Optimal	334	334	1	19.1432	0	0
C30x30-5-1_10_10_50-2_7-2.dat	2	6	6	(0,0)	C-6	Optimal	313	313	1	12.8815	0	0
C30x30-5-1_10_10_50-2_7-3.dat	2	5	5	(0,0)	C-6	Optimal	322	322	1	4.46402	0	0
C30x30-5-1_10_10_50-2_7-4.dat	2	6	6	(0,0)	C-6	Optimal	431	431	1	6.22698	0	0
C30x30-5-1_10_10_50-2_7-5.dat	2	6	6	(0,0)	C-6	Optimal	254	254	1	6.81	0	0
D10x10-10-1_10_10_20-1.dat	2	8	8	(0,0)	D-4	Optimal	564	564	1	100.162	0	0
D10x10-10-1_10_10_20-2.dat	2	8	8	(0,0)	D-4	Optimal	356	356	1	107.109	0	0
D10x10-10-1_10_10_20-3.dat	2	9	9	(0,0)	D-4	Optimal	360	360	1	283.349	0	0
D10x10-10-1_10_10_20-4.dat	2	9	9	(0,0)	D-4	Optimal	419	419	1	226.465	0	0
D10x10-10-1_10_10_20-5.dat	2	7	7	(0,0)	D-4	Optimal	370	370	1	135.543	0	0
D10x10-10-1_10_10_50-1.dat	2	9	9	(0,0)	D-4	Optimal	366	366	1	132.516	0	0
D10x10-10-1_10_10_50-2.dat	2	9	9	(0,0)	D-4	Optimal	757	757	1	231.12	0	0
D10x10-10-1_10_10_50-3.dat	2	6	6	(0,0)	D-4	Optimal	447	447	1	46.9715	0	0
D10x10-10-1_10_10_50-4.dat	2	8	8	(0,0)	D-4	Optimal	533	533	1	153.984	0	0
D10x10-10-1_10_10_50-5.dat	2	8	8	(0,0)	D-4	Optimal	504	504	1	55.4971	0	0
D10x10-5-1_10_10_20-1.dat	2	9	9	(0,0)	D-3	Optimal	217	217	1	75.1185	0	0
D10x10-5-1_10_10_20-2.dat	2	9	9	(0,0)	D-3	Optimal	231	231	1	25.4065	0	0
D10x10-5-1_10_10_20-3.dat	2	8	8	(0,0)	D-3	Optimal	329	329	1	16.7975	0	0
D10x10-5-1_10_10_20-4.dat	2	8	8	(0,0)	D-3	Optimal	241	241	1	26.4023	0	0
D10x10-5-1_10_10_20-5.dat	2	8	8	(0,0)	D-3	Optimal	162	162	1	22.916	0	0
D10x10-5-1_10_10_50-1.dat	2	7	7	(0,0)	D-3	Optimal	145	145	1	9.09921	0	0
D10x10-5-1_10_10_50-2.dat	2	8	8	(0,0)	D-3	Optimal	370	370	1	28.0986	0	0
D10x10-5-1_10_10_50-3.dat	2	9	9	(0,0)	D-3	Optimal	722	722	1	20.9386	0	0
D10x10-5-1_10_10_50-4.dat	2	7	7	(0,0)	D-3	Optimal	460	460	1	10.1002	0	0
D10x10-5-1_10_10_50-5.dat	2	9	9	(0,0)	D-3	Optimal	253	253	1	24.7654	0	0
D20x20-5-1_10_10_20-1.dat	2	18	18	(0,0)	D-5	Optimal	429	429	1	1985	0	0
D20x20-5-1_10_10_20-2.dat	2	14	14	(0,0)	D-5	Optimal	368	368	1	389.883	0	0
D20x20-5-1_10_10_20-3.dat	2	16	16	(0,0)	D-5	Optimal	293	293	1	1079.99	0	0
D20x20-5-1_10_10_20-4.dat	2	13	13	(0,0)	D-5	Optimal	289	289	1	66.1619	0	0
D20x20-5-1_10_10_20-5.dat	2	16	16	(0,0)	D-5	Optimal	392	392	1	3604.94	0	0
D20x20-5-1_10_10_50-1.dat	2	14	14	(0,0)	D-5	Infeasible	1e+75	1e+75	1	3.99644	0	0
D20x20-5-1_10_10_50-2.dat	2	12	12	(0,0)	D-5	Optimal	719	719	1	149.905	0	0
D20x20-5-1_10_10_50-3.dat	2	14	14	(0,0)	D-5	Optimal	632	632	1	346.711	0	0
D20x20-5-1_10_10_50-4.dat	2	14	14	(0,0)	D-5	Optimal	483	483	1	454.05	0	0
D20x20-5-1_10_10_50-5.dat	2	15	15	(0,0)	D-5	Optimal	673	673	1	193.262	0	0
D5x5-5-1_10_10_20-1.dat	2	4	4	(0,0)	D-1	Optimal	104	104	1	1.22535	0	0
D5x5-5-1_10_10_20-2.dat	2	3	3	(0,0)	D-1	Optimal	116	116	1	0.190013	0	0
D5x5-5-1_10_10_20-3.dat	2	4	4	(0,0)	D-1	Optimal	182	182	1	1.17138	0	0
D5x5-5-1_10_10_20-4.dat	2	4	4	(0,0)	D-1	Optimal	233	233	1	1.72996	0	0
D5x5-5-1_10_10_20-5.dat	2	4	4	(0,0)	D-1	Optimal	138	138	1	2.99765	0	0
D5x5-5-1_10_10_50-1.dat	2	4	4	(0,0)	D-1	Optimal	222	222	1	1.23201	0	0
D5x5-5-1_10_10_50-2.dat	2	4	4	(0,0)	D-1	Infeasible	1e+75	1e+75	1	0.552153	0	0
D5x5-5-1_10_10_50-3.dat	2	4	4	(0,0)	D-1	Optimal	329	329	1	1.2818	0	0
D5x5-5-1_10_10_50-4.dat	2	4	4	(0,0)	D-1	Optimal	246	246	1	1.31663	0	0
D5x5-5-1_10_10_50-5.dat	2	3	3	(0,0)	D-1	Optimal	223	223	1	0.205511	0	0
D7x7-5-1_10_10_20-1.dat	2	6	6	(0,0)	D-2	Infeasible	1e+75	1e+75	1	0.744142	0	0
D7x7-5-1_10_10_20-2.dat	2	5	5	(0,0)	D-2	Optimal	231	231	1	3.83346	0	0
D7x7-5-1_10_10_20-3.dat	2	4	4	(0,0)	D-2	Infeasible	1e+75	1e+75	1	0.810424	0	0
D7x7-5-1_10_10_20-4.dat	2	5	5	(0,0)	D-2	Optimal	171	171	1	8.4187	0	0
D7x7-5-1_10_10_20-5.dat	2	6	6	(0,0)	D-2	Optimal	126	126	1	6.40935	0	0
D7x7-5-1_10_10_50-1.dat	2	6	6	(0,0)	D-2	Optimal	266	266	1	7.57099	0	0
D7x7-5-1_10_10_50-2.dat	2	4	4	(0,0)	D-2	Optimal	236	236	1	1.28452	0	0
D7x7-5-1_10_10_50-3.dat	2	5	5	(0,0)	D-2	Optimal	156	156	1	3.63206	0	0
D7x7-5-1_10_10_50-4.dat	2	6	6	(0,0)	D-2	Optimal	204	204	1	5.60595	0	0
D7x7-5-1_10_10_50-5.dat	2	5	5	(0,0)	D-2	Optimal	350	350	1	3.57289	0	0
E100-10-0.1-1.dat	2	7	7	(0,0)	E-10	Infeasible	1e+75	1e+75	1	11.8728	0	0
E100-10-0.1-2.dat	2	8	8	(0,0)	E-10	Infeasible	1e+75	1e+75	1	15.6401	0	0
E100-10-0.1-3.dat	2	9	9	(0,0)	E-10	Optimal	671	671	1	1022.67	0	0
E100-10-0.1-4.dat	2	6	6	(0,0)	E-10	Infeasible	1e+75	1e+75	1	10.4015	0	0
E100-10-0.1-5.dat	2	6	6	(0,0)	E-10	Infeasible	1e+75	1e+75	1	8.06371	0	0
E100-10-0.2-1.dat	2	5	5	(0,0)	E-12	Optimal	547	547	1	178.63	0	0
E100-10-0.2-2.dat	2	5	5	(0,0)	E-12	Infeasible	1e+75	1e+75	1	13.2272	0	0
E100-10-0.2-3.dat	2	3	3	(0,0)	E-12	Infeasible	1e+75	1e+75	1	0.84875	0	0
E100-10-0.2-4.dat	2	6	6	(0,0)	E-12	Infeasible	1e+75	1e+75	1	14.3201	0	0
E100-10-0.2-5.dat	2	5	5	(0,0)	E-12	Optimal	530	530	1	436.566	0	0
E100-5-0.1-1.dat	2	5	5	(0,0)	E-9	Infeasible	1e+75	1e+75	1	2.59885	0	0
E100-5-0.1-2.dat	2	5	5	(0,0)	E-9	Infeasible	1e+75	1e+75	1	1.18093	0	0
E100-5-0.1-3.dat	2	5	5	(0,0)	E-9	Optimal	218	218	1	7.87532	0	0
E100-5-0.1-4.dat	2	5	5	(0,0)	E-9	Infeasible	1e+75	1e+75	1	0.549951	0	0
E100-5-0.1-5.dat	2	6	6	(0,0)	E-9	Optimal	341	341	1	20.394	0	0
E100-5-0.2-1.dat	2	5	5	(0,0)	E-11	Optimal	401	401	1	96.7838	0	1
E100-5-0.2-2.dat	2	4	4	(0,0)	E-11	Optimal	271	271	1	11.99	0	0
E100-5-0.2-3.dat	2	3	3	(0,0)	E-11	Infeasible	1e+75	1e+75	1	0.663344	0	0
E100-5-0.2-4.dat	2	4	4	(0,0)	E-11	Optimal	278	278	1	25.0849	0	0
E100-5-0.2-5.dat	2	4	4	(0,0)	E-11	Infeasible	1e+75	1e+75	1	2.5113	0	0
E50-10-0.1-1.dat	2	7	7	(0,0)	E-2	Infeasible	1e+75	1e+75	1	3.52837	0	0
E50-10-0.1-2.dat	2	8	8	(0,0)	E-2	Infeasible	1e+75	1e+75	1	2.20474	0	0
E50-10-0.1-3.dat	2	8	8	(0,0)	E-2	Infeasible	1e+75	1e+75	1	1.93126	0	0
E50-10-0.1-4.dat	2	11	11	(0,0)	E-2	Infeasible	1e+75	1e+75	1	2.60113	0	0
E50-10-0.1-5.dat	2	9	9	(0,0)	E-2	Infeasible	1e+75	1e+75	1	2.91999	0	0
E50-10-0.2-1.dat	2	4	4	(0,0)	E-4	Infeasible	1e+75	1e+75	1	6.31853	0	0
E50-10-0.2-2.dat	2	6	6	(0,0)	E-4	Infeasible	1e+75	1e+75	1	5.39238	0	0
E50-10-0.2-3.dat	2	5	5	(0,0)	E-4	Optimal	480	480	1	49.4225	0	0
E50-10-0.2-4.dat	2	5	5	(0,0)	E-4	Infeasible	1e+75	1e+75	1	7.15402	0	0
E50-10-0.2-5.dat	2	4	4	(0,0)	E-4	Infeasible	1e+75	1e+75	1	5.81219	0	0
E50-5-0.1-1.dat	2	6	6	(0,0)	E-1	Infeasible	1e+75	1e+75	1	0.602503	0	0
E50-5-0.1-2.dat	2	8	8	(0,0)	E-1	Infeasible	1e+75	1e+75	1	0.526784	0	0
E50-5-0.1-3.dat	2	7	7	(0,0)	E-1	Infeasible	1e+75	1e+75	1	0.658119	0	0
E50-5-0.1-4.dat	2	9	9	(0,0)	E-1	Infeasible	1e+75	1e+75	1	0.831421	0	0
E50-5-0.1-5.dat	2	8	8	(0,0)	E-1	Infeasible	1e+75	1e+75	1	0.64956	0	0
E50-5-0.2-1.dat	2	4	4	(0,0)	E-3	Infeasible	1e+75	1e+75	1	0.98149	0	0
E50-5-0.2-2.dat	2	6	6	(0,0)	E-3	Infeasible	1e+75	1e+75	1	1.08189	0	0
E50-5-0.2-3.dat	2	4	4	(0,0)	E-3	Infeasible	1e+75	1e+75	1	0.481131	0	0
E50-5-0.2-4.dat	2	4	4	(0,0)	E-3	Infeasible	1e+75	1e+75	1	0.639932	0	0
E50-5-0.2-5.dat	2	5	5	(0,0)	E-3	Optimal	269	269	1	7.03633	0	0
E75-10-0.1-1.dat	2	8	8	(0,0)	E-6	Infeasible	1e+75	1e+75	1	6.07064	0	0
E75-10-0.1-2.dat	2	9	9	(0,0)	E-6	Optimal	534	534	1	129.128	0	0
E75-10-0.1-3.dat	2	6	6	(0,0)	E-6	Optimal	503	503	1	16.9565	0	0
E75-10-0.1-4.dat	2	12	12	(0,0)	E-6	Infeasible	1e+75	1e+75	1	5.58064	0	0
E75-10-0.1-5.dat	2	8	8	(0,0)	E-6	Infeasible	1e+75	1e+75	1	9.80567	0	0
E75-10-0.2-1.dat	2	4	4	(0,0)	E-8	Optimal	478	478	1	46.1811	0	0
E75-10-0.2-2.dat	2	5	5	(0,0)	E-8	Optimal	537	537	1	154.186	0	0
E75-10-0.2-3.dat	2	5	5	(0,0)	E-8	Infeasible	1e+75	1e+75	1	12.2342	0	0
E75-10-0.2-4.dat	2	4	4	(0,0)	E-8	Optimal	613	613	1	57.126	0	0
E75-10-0.2-5.dat	2	5	5	(0,0)	E-8	Optimal	498	498	1	46.3233	0	0
E75-5-0.1-1.dat	2	6	6	(0,0)	E-5	Infeasible	1e+75	1e+75	1	1.89863	0	0
E75-5-0.1-2.dat	2	6	6	(0,0)	E-5	Infeasible	1e+75	1e+75	1	0.639136	0	0
E75-5-0.1-3.dat	2	5	5	(0,0)	E-5	Infeasible	1e+75	1e+75	1	0.827425	0	0
E75-5-0.1-4.dat	2	6	6	(0,0)	E-5	Optimal	364	364	1	13.5608	0	0
E75-5-0.1-5.dat	2	5	5	(0,0)	E-5	Infeasible	1e+75	1e+75	1	1.11156	0	0
E75-5-0.2-1.dat	2	4	4	(0,0)	E-7	Optimal	336	336	1	28.3001	0	0
E75-5-0.2-2.dat	2	4	4	(0,0)	E-7	Infeasible	1e+75	1e+75	1	1.10224	0	0
E75-5-0.2-3.dat	2	3	3	(0,0)	E-7	Optimal	315	315	1	0.456556	0	0
E75-5-0.2-4.dat	2	6	6	(0,0)	E-7	Optimal	363	363	1	48.8565	0	0
E75-5-0.2-5.dat	2	5	5	(0,0)	E-7	Optimal	274	274	1	12.9316	0	0
RE100-10-0.1-1.dat	2	4	4	(0,0)	R-10	Optimal	1287	1287	1	230.212	0	0
RE100-10-0.1-2.dat	2	4	4	(0,0)	R-10	Optimal	1425	1425	1	179.029	0	0
RE100-10-0.1-3.dat	2	4	4	(0,0)	R-10	Infeasible	1e+75	1e+75	1	4.34482	0	0
RE100-10-0.1-4.dat	2	4	4	(0,0)	R-10	Infeasible	1e+75	1e+75	1	5.18999	0	0
RE100-10-0.1-5.dat	2	4	4	(0,0)	R-10	Infeasible	1e+75	1e+75	1	6.71862	0	0
RE100-10-0.2-1.dat	2	3	3	(0,0)	R-12	Optimal	2288	2288	1	86.6388	0	0
RE100-10-0.2-2.dat	2	3	3	(0,0)	R-12	Optimal	1823	1823	1	156.824	0	1
RE100-10-0.2-3.dat	2	3	3	(0,0)	R-12	Optimal	1456	1456	1	1.78513	0	0
RE100-10-0.2-4.dat	2	3	3	(0,0)	R-12	Optimal	1624	1624	1	42.7736	0	1
RE100-10-0.2-5.dat	2	3	3	(0,0)	R-12	Optimal	1428	1428	1	10.5898	0	0
RE100-5-0.1-1.dat	2	3	3	(0,0)	R-9	Infeasible	1e+75	1e+75	1	0.197458	0	0
RE100-5-0.1-2.dat	2	3	3	(0,0)	R-9	Infeasible	1e+75	1e+75	1	0.411427	0	0
RE100-5-0.1-3.dat	2	3	3	(0,0)	R-9	Optimal	835	835	1	0.301196	0	0
RE100-5-0.1-4.dat	2	5	5	(0,0)	R-9	Infeasible	1e+75	1e+75	1	0.830316	0	0
RE100-5-0.1-5.dat	2	4	4	(0,0)	R-9	Infeasible	1e+75	1e+75	1	1.65972	0	0
RE100-5-0.2-1.dat	2	2	2	(0,0)	R-11	Infeasible	1e+75	1e+75	1	0.171222	0	0
RE100-5-0.2-2.dat	2	2	2	(0,0)	R-11	Optimal	1119	1119	1	0.192761	0	0
RE100-5-0.2-3.dat	2	2	2	(0,0)	R-11	Optimal	1219	1219	1	0.198329	0	0
RE100-5-0.2-4.dat	2	2	2	(0,0)	R-11	Optimal	702	702	1	0.40732	0	0
RE100-5-0.2-5.dat	2	2	2	(0,0)	R-11	Infeasible	1e+75	1e+75	1	0.171325	0	0
RE50-10-0.1-1.dat	2	4	4	(0,0)	R-2	Infeasible	1e+75	1e+75	1	1.05924	0	0
RE50-10-0.1-2.dat	2	5	5	(0,0)	R-2	Infeasible	1e+75	1e+75	1	1.64895	0	0
RE50-10-0.1-3.dat	2	6	6	(0,0)	R-2	Infeasible	1e+75	1e+75	1	3.32778	0	0
RE50-10-0.1-4.dat	2	6	6	(0,0)	R-2	Optimal	896	896	1	24.9129	0	0
RE50-10-0.1-5.dat	2	5	5	(0,0)	R-2	Infeasible	1e+75	1e+75	1	1.59446	0	0
RE50-10-0.2-1.dat	2	3	3	(0,0)	R-4	Infeasible	1e+75	1e+75	1	0.413297	0	0
RE50-10-0.2-2.dat	2	3	3	(0,0)	R-4	Infeasible	1e+75	1e+75	1	0.388275	0	0
RE50-10-0.2-3.dat	2	3	3	(0,0)	R-4	Optimal	1755	1755	1	2.70342	0	0
RE50-10-0.2-4.dat	2	3	3	(0,0)	R-4	Optimal	1796	1796	1	1.36983	0	0
RE50-10-0.2-5.dat	2	3	3	(0,0)	R-4	Optimal	1545	1545	1	2.45881	0	0
RE50-5-0.1-1.dat	2	3	3	(0,0)	R-1	Infeasible	1e+75	1e+75	1	0.146318	0	0
RE50-5-0.1-2.dat	2	5	5	(0,0)	R-1	Optimal	713	713	1	4.74831	0	0
RE50-5-0.1-3.dat	2	5	5	(0,0)	R-1	Optimal	852	852	1	2.5931	0	0
RE50-5-0.1-4.dat	2	4	4	(0,0)	R-1	Infeasible	1e+75	1e+75	1	0.35442	0	0
RE50-5-0.1-5.dat	2	6	6	(0,0)	R-1	Optimal	852	852	1	4.29413	0	0
RE50-5-0.2-1.dat	2	2	2	(0,0)	R-3	Optimal	1118	1118	1	0.144478	0	0
RE50-5-0.2-2.dat	2	3	3	(0,0)	R-3	Optimal	814	814	1	0.336454	0	0
RE50-5-0.2-3.dat	2	3	3	(0,0)	R-3	Infeasible	1e+75	1e+75	1	0.190755	0	0
RE50-5-0.2-4.dat	2	3	3	(0,0)	R-3	Optimal	1182	1182	1	0.276195	0	0
RE50-5-0.2-5.dat	2	3	3	(0,0)	R-3	Infeasible	1e+75	1e+75	1	0.184142	0	0
RE75-10-0.1-1.dat	2	4	4	(0,0)	R-6	Optimal	1620	1620	1	30.2962	0	0
RE75-10-0.1-2.dat	2	4	4	(0,0)	R-6	Infeasible	1e+75	1e+75	1	3.09767	0	0
RE75-10-0.1-3.dat	2	4	4	(0,0)	R-6	Infeasible	1e+75	1e+75	1	2.92479	0	0
RE75-10-0.1-4.dat	2	4	4	(0,0)	R-6	Infeasible	1e+75	1e+75	1	2.08196	0	0
RE75-10-0.1-5.dat	2	5	5	(0,0)	R-6	Infeasible	1e+75	1e+75	1	4.02853	0	0
RE75-10-0.2-1.dat	2	3	3	(0,0)	R-8	Optimal	2302	2302	1	1.90292	0	0
RE75-10-0.2-2.dat	2	3	3	(0,0)	R-8	Optimal	2203	2203	1	12.0035	0	0
RE75-10-0.2-3.dat	2	3	3	(0,0)	R-8	Optimal	2083	2083	1	11.4356	0	0
RE75-10-0.2-4.dat	2	3	3	(0,0)	R-8	Optimal	2149	2149	1	9.7692	0	0
RE75-10-0.2-5.dat	2	2	2	(0,0)	R-8	Infeasible	1e+75	1e+75	1	0.285258	0	0
RE75-5-0.1-1.dat	2	4	4	(0,0)	R-5	Optimal	709	709	1	3.20203	0	0
RE75-5-0.1-2.dat	2	4	4	(0,0)	R-5	Infeasible	1e+75	1e+75	1	0.484392	0	0
RE75-5-0.1-3.dat	2	4	4	(0,0)	R-5	Infeasible	1e+75	1e+75	1	0.628717	0	0
RE75-5-0.1-4.dat	2	4	4	(0,0)	R-5	Optimal	488	488	1	3.90062	0	0
RE75-5-0.1-5.dat	2	3	3	(0,0)	R-5	Infeasible	1e+75	1e+75	1	0.148458	0	0
RE75-5-0.2-1.dat	2	2	2	(0,0)	R-7	Infeasible	1e+75	1e+75	1	0.164057	0	0
RE75-5-0.2-2.dat	2	3	3	(0,0)	R-7	Optimal	846	846	1	0.345414	0	0
RE75-5-0.2-3.dat	2	3	3	(0,0)	R-7	Optimal	780	780	1	0.359554	0	0
RE75-5-0.2-4.dat	2	3	3	(0,0)	R-7	Optimal	708	708	1	0.385824	0	1
RE75-5-0.2-5.dat	2	2	2	(0,0)	R-7	Infeasible	1e+75	1e+75	1	0.229909	0	0
C10x10-10-1_10_10_20-2_5-1.dat	2	4	5	(0,1)	C-2	Optimal	300	300	1	8.24419	0	0
C10x10-10-1_10_10_20-2_5-2.dat	2	5	6	(0,1)	C-2	Optimal	297	297	1	10.5488	0	0
C10x10-10-1_10_10_20-2_5-3.dat	2	5	6	(0,1)	C-2	Optimal	305	305	1	26.7453	0	0
C10x10-10-1_10_10_20-2_5-4.dat	2	4	5	(0,1)	C-2	Optimal	229	229	1	6.21175	0	0
C10x10-10-1_10_10_20-2_5-5.dat	2	4	5	(0,1)	C-2	Optimal	216	216	1	4.28552	0	0
C10x10-10-1_10_10_20-2_7-1.dat	2	7	8	(0,1)	C-2	Optimal	331	331	1	118.052	0	0
C10x10-10-1_10_10_20-2_7-2.dat	2	6	7	(0,1)	C-2	Optimal	308	308	1	42.9652	0	0
C10x10-10-1_10_10_20-2_7-3.dat	2	6	7	(0,1)	C-2	Optimal	309	309	1	51.549	0	0
C10x10-10-1_10_10_20-2_7-4.dat	2	6	7	(0,1)	C-2	Optimal	353	353	1	42.3136	0	0
C10x10-10-1_10_10_20-2_7-5.dat	2	6	7	(0,1)	C-2	Optimal	301	301	1	38.883	0	0
C10x10-10-1_10_10_50-2_5-1.dat	2	5	6	(0,1)	C-2	Optimal	284	284	1	9.00292	0	0
C10x10-10-1_10_10_50-2_5-2.dat	2	4	5	(0,1)	C-2	Optimal	341	341	1	3.85784	0	0
C10x10-10-1_10_10_50-2_5-3.dat	2	5	6	(0,1)	C-2	Optimal	300	300	1	13.5178	0	0
C10x10-10-1_10_10_50-2_5-4.dat	2	4	5	(0,1)	C-2	Optimal	236	236	1	4.02879	0	0
C10x10-10-1_10_10_50-2_5-5.dat	2	4	5	(0,1)	C-2	Optimal	406	406	1	6.09456	0	0
C10x10-10-1_10_10_50-2_7-1.dat	2	7	8	(0,1)	C-2	Optimal	306	306	1	39.4169	0	0
C10x10-10-1_10_10_50-2_7-2.dat	2	6	7	(0,1)	C-2	Optimal	270	270	1	18.1626	0	0
C10x10-10-1_10_10_50-2_7-3.dat	2	7	8	(0,1)	C-2	Optimal	258	258	1	49.2625	0	0
C10x10-10-1_10_10_50-2_7-4.dat	2	7	8	(0,1)	C-2	Optimal	288	288	1	78.4074	0	0
C10x10-10-1_10_10_50-2_7-5.dat	2	6	7	(0,1)	C-2	Optimal	367	367	1	20.0419	0	0
C10x10-5-1_10_10_20-2_5-1.dat	2	3	4	(0,1)	C-1	Optimal	159	159	1	0.868328	0	0
C10x10-5-1_10_10_20-2_5-2.dat	2	4	5	(0,1)	C-1	Optimal	214	214	1	3.58897	0	0
C10x10-5-1_10_10_20-2_5-3.dat	2	4	5	(0,1)	C-1	Optimal	209	209	1	2.69799	0	0
C10x10-5-1_10_10_20-2_5-4.dat	2	4	5	(0,1)	C-1	Optimal	159	159	1	2.27374	0	0
C10x10-5-1_10_10_20-2_5-5.dat	2	4	5	(0,1)	C-1	Optimal	148	148	1	1.67065	0	0
C10x10-5-1_10_10_20-2_7-1.dat	2	7	8	(0,1)	C-1	Optimal	169	169	1	38.3858	0	0
C10x10-5-1_10_10_20-2_7-2.dat	2	6	7	(0,1)	C-1	Optimal	164	164	1	19.4187	0	0
C10x10-5-1_10_10_20-2_7-3.dat	2	5	6	(0,1)	C-1	Optimal	203	203	1	10.8419	0	0
C10x10-5-1_10_10_20-2_7-4.dat	2	5	6	(0,1)	C-1	Optimal	189	189	1	8.25469	0	0
C10x10-5-1_10_10_20-2_7-5.dat	2	6	7	(0,1)	C-1	Optimal	169	169	1	8.73573	0	0
C10x10-5-1_10_10_50-2_5-1.dat	2	5	6	(0,1)	C-1	Optimal	148	148	1	6.71426	0	0
C10x10-5-1_10_10_50-2_5-2.dat	2	3	4	(0,1)	C-1	Optimal	220	220	1	0.91149	0	0
C10x10-5-1_10_10_50-2_5-3.dat	2	3	4	(0,1)	C-1	Optimal	149	149	1	1.4021	0	0
C10x10-5-1_10_10_50-2_5-4.dat	2	5	6	(0,1)	C-1	Optimal	213	213	1	8.92851	0	0
C10x10-5-1_10_10_50-2_5-5.dat	2	4	5	(0,1)	C-1	Optimal	183	183	1	4.39749	0	0
C10x10-5-1_10_10_50-2_7-1.dat	2	5	6	(0,1)	C-1	Optimal	187	187	1	4.60502	0	0
C10x10-5-1_10_10_50-2_7-2.dat	2	6	7	(0,1)	C-1	Optimal	177	177	1	15.6555	0	0
C10x10-5-1_10_10_50-2_7-3.dat	2	6	7	(0,1)	C-1	Optimal	265	265	1	18.992	0	0
C10x10-5-1_10_10_50-2_7-4.dat	2	5	6	(0,1)	C-1	Optimal	237	237	1	10.3673	0	0
C10x10-5-1_10_10_50-2_7-5.dat	2	4	5	(0,1)	C-1	Optimal	233	233	1	3.33725	0	0
C20x20-10-1_10_10_20-2_5-1.dat	2	5	6	(0,1)	C-4	Optimal	347	347	1	15.8449	0	0
C20x20-10-1_10_10_20-2_5-2.dat	2	4	5	(0,1)	C-4	Optimal	328	328	1	5.77078	0	0
C20x20-10-1_10_10_20-2_5-3.dat	2	5	6	(0,1)	C-4	Optimal	393	393	1	21.6485	0	0
C20x20-10-1_10_10_20-2_5-4.dat	2	5	6	(0,1)	C-4	Optimal	410	410	1	26.5663	0	0
C20x20-10-1_10_10_20-2_5-5.dat	2	4	5	(0,1)	C-4	Optimal	342	342	1	6.33287	0	0
C20x20-10-1_10_10_20-2_7-1.dat	2	7	8	(0,1)	C-4	Optimal	431	431	1	59.6607	0	0
C20x20-10-1_10_10_20-2_7-2.dat	2	5	6	(0,1)	C-4	Optimal	500	500	1	14.8034	0	0
C20x20-10-1_10_10_20-2_7-3.dat	2	5	6	(0,1)	C-4	Optimal	406	406	1	23.6419	0	0
C20x20-10-1_10_10_20-2_7-4.dat	2	6	7	(0,1)	C-4	Optimal	414	414	1	33.8717	0	0
C20x20-10-1_10_10_20-2_7-5.dat	2	6	7	(0,1)	C-4	Optimal	326	326	1	47.3908	0	0
C20x20-10-1_10_10_50-2_5-1.dat	2	5	6	(0,1)	C-4	Optimal	343	343	1	15.7949	0	0
C20x20-10-1_10_10_50-2_5-2.dat	2	4	5	(0,1)	C-4	Optimal	355	355	1	6.61514	0	0
C20x20-10-1_10_10_50-2_5-3.dat	2	5	6	(0,1)	C-4	Optimal	429	429	1	22.3711	0	0
C20x20-10-1_10_10_50-2_5-4.dat	2	5	6	(0,1)	C-4	Optimal	385	385	1	17.8634	0	0
C20x20-10-1_10_10_50-2_5-5.dat	2	4	5	(0,1)	C-4	Optimal	416	416	1	8.2289	0	0
C20x20-10-1_10_10_50-2_7-1.dat	2	5	6	(0,1)	C-4	Optimal	446	446	1	18.0639	0	0
C20x20-10-1_10_10_50-2_7-2.dat	2	5	6	(0,1)	C-4	Optimal	486	486	1	18.439	0	0
C20x20-10-1_10_10_50-2_7-3.dat	2	6	7	(0,1)	C-4	Optimal	491	491	1	43.6552	0	0
C20x20-10-1_10_10_50-2_7-4.dat	2	5	6	(0,1)	C-4	Optimal	436	436	1	19.7575	0	0
C20x20-10-1_10_10_50-2_7-5.dat	2	5	6	(0,1)	C-4	Optimal	349	349	1	18.6322	0	0
C20x20-20-1_10_10_20-2_5-1.dat	2	5	6	(0,1)	C-5	Optimal	668	668	1	40.9201	0	0
C20x20-20-1_10_10_20-2_5-2.dat	2	5	6	(0,1)	C-5	Optimal	671	671	1	38.6133	0	0
C20x20-20-1_10_10_20-2_5-3.dat	2	5	6	(0,1)	C-5	Optimal	662	662	1	37.6765	0	0
C20x20-20-1_10_10_20-2_5-4.dat	2	5	6	(0,1)	C-5	Optimal	683	683	1	36.6635	0	0
C20x20-20-1_10_10_20-2_5-5.dat	2	5	6	(0,1)	C-5	Optimal	729	729	1	28.8491	0	0
C20x20-20-1_10_10_20-2_7-1.dat	2	7	8	(0,1)	C-5	Optimal	799	799	1	1121	0	0
C20x20-20-1_10_10_20-2_7-2.dat	2	6	7	(0,1)	C-5	Optimal	724	724	1	60.2748	0	0
C20x20-20-1_10_10_20-2_7-3.dat	2	7	8	(0,1)	C-5	Optimal	841	841	1	5136.91	0	0
C20x20-20-1_10_10_20-2_7-4.dat	2	7	8	(0,1)	C-5	Optimal	652	652	1	101.656	0	0
C20x20-20-1_10_10_20-2_7-5.dat	2	6	7	(0,1)	C-5	Optimal	776	776	1	120.989	0	0
C20x20-20-1_10_10_50-2_5-1.dat	2	5	6	(0,1)	C-5	Optimal	630	630	1	24.1469	0	0
C20x20-20-1_10_10_50-2_5-2.dat	2	5	6	(0,1)	C-5	Optimal	720	720	1	30.9012	0	0
C20x20-20-1_10_10_50-2_5-3.dat	2	5	6	(0,1)	C-5	Optimal	625	625	1	32.5934	0	0
C20x20-20-1_10_10_50-2_5-4.dat	2	4	5	(0,1)	C-5	Optimal	764	764	1	15.8707	0	0
C20x20-20-1_10_10_50-2_5-5.dat	2	5	6	(0,1)	C-5	Optimal	629	629	1	27.4375	0	0
C20x20-20-1_10_10_50-2_7-1.dat	2	6	7	(0,1)	C-5	Optimal	788	788	1	84.7102	0	0
C20x20-20-1_10_10_50-2_7-2.dat	2	7	8	(0,1)	C-5	Optimal	765	765	1	91.1284	0	0
C20x20-20-1_10_10_50-2_7-3.dat	2	7	8	(0,1)	C-5	Optimal	796	796	1	122.257	0	0
C20x20-20-1_10_10_50-2_7-4.dat	2	6	7	(0,1)	C-5	Optimal	823	823	1	43.033	0	0
C20x20-20-1_10_10_50-2_7-5.dat	2	7	8	(0,1)	C-5	Optimal	670	670	1	75.1757	0	0
C20x20-5-1_10_10_20-2_5-1.dat	2	4	5	(0,1)	C-3	Optimal	170	170	1	4.42561	0	0
C20x20-5-1_10_10_20-2_5-2.dat	2	3	4	(0,1)	C-3	Optimal	189	189	1	1.00162	0	0
C20x20-5-1_10_10_20-2_5-3.dat	2	4	5	(0,1)	C-3	Optimal	206	206	1	3.60286	0	0
C20x20-5-1_10_10_20-2_5-4.dat	2	4	5	(0,1)	C-3	Optimal	218	218	1	3.7419	0	0
C20x20-5-1_10_10_20-2_5-5.dat	2	4	5	(0,1)	C-3	Optimal	203	203	1	2.60478	0	0
C20x20-5-1_10_10_20-2_7-1.dat	2	7	8	(0,1)	C-3	Optimal	197	197	1	25.8602	0	0
C20x20-5-1_10_10_20-2_7-2.dat	2	6	7	(0,1)	C-3	Optimal	247	247	1	15.3141	0	0
C20x20-5-1_10_10_20-2_7-3.dat	2	6	7	(0,1)	C-3	Optimal	219	219	1	12.89	0	0
C20x20-5-1_10_10_20-2_7-4.dat	2	7	8	(0,1)	C-3	Optimal	211	211	1	22.2016	0	0
C20x20-5-1_10_10_20-2_7-5.dat	2	6	7	(0,1)	C-3	Optimal	203	203	1	28.2677	0	0
C20x20-5-1_10_10_50-2_5-1.dat	2	3	4	(0,1)	C-3	Optimal	227	227	1	1.04118	0	0
C20x20-5-1_10_10_50-2_5-2.dat	2	4	5	(0,1)	C-3	Optimal	249	249	1	3.84554	0	0
C20x20-5-1_10_10_50-2_5-3.dat	2	5	6	(0,1)	C-3	Optimal	228	228	1	12.3068	0	0
C20x20-5-1_10_10_50-2_5-4.dat	2	3	4	(0,1)	C-3	Optimal	182	182	1	1.51969	0	0
C20x20-5-1_10_10_50-2_5-5.dat	2	4	5	(0,1)	C-3	Optimal	234	234	1	3.16886	0	0
C20x20-5-1_10_10_50-2_7-1.dat	2	5	6	(0,1)	C-3	Optimal	262	262	1	9.36812	0	0
C20x20-5-1_10_10_50-2_7-2.dat	2	3	4	(0,1)	C-3	Optimal	204	204	1	1.00724	0	0
C20x20-5-1_10_10_50-2_7-3.dat	2	7	8	(0,1)	C-3	Optimal	312	312	1	22.3748	0	0
C20x20-5-1_10_10_50-2_7-4.dat	2	5	6	(0,1)	C-3	Optimal	245	245	1	9.43548	0	0
C20x20-5-1_10_10_50-2_7-5.dat	2	4	5	(0,1)	C-3	Optimal	215	215	1	2.9497	0	0
C30x30-10-1_10_10_20-2_5-1.dat	2	5	6	(0,1)	C-7	Optimal	401	401	1	22.4418	0	0
C30x30-10-1_10_10_20-2_5-2.dat	2	5	6	(0,1)	C-7	Optimal	397	397	1	23.1922	0	0
C30x30-10-1_10_10_20-2_5-3.dat	2	5	6	(0,1)	C-7	Optimal	371	371	1	20.1811	0	0
C30x30-10-1_10_10_20-2_5-4.dat	2	5	6	(0,1)	C-7	Optimal	421	421	1	24.4978	0	0
C30x30-10-1_10_10_20-2_5-5.dat	2	4	5	(0,1)	C-7	Optimal	413	413	1	9.23408	0	0
C30x30-10-1_10_10_20-2_7-1.dat	2	5	6	(0,1)	C-7	Optimal	507	507	1	21.302	0	0
C30x30-10-1_10_10_20-2_7-2.dat	2	5	6	(0,1)	C-7	Optimal	452	452	1	19.493	0	0
C30x30-10-1_10_10_20-2_7-3.dat	2	7	8	(0,1)	C-7	Optimal	519	519	1	86.1269	0	0
C30x30-10-1_10_10_20-2_7-4.dat	2	7	8	(0,1)	C-7	Optimal	438	438	1	87.5018	0	0
C30x30-10-1_10_10_20-2_7-5.dat	2	6	7	(0,1)	C-7	Optimal	518	518	1	30.529	0	0
C30x30-10-1_10_10_50-2_5-1.dat	2	4	5	(0,1)	C-7	Optimal	332	332	1	7.87955	0	0
C30x30-10-1_10_10_50-2_5-2.dat	2	4	5	(0,1)	C-7	Optimal	443	443	1	10.4802	0	0
C30x30-10-1_10_10_50-2_5-3.dat	2	5	6	(0,1)	C-7	Optimal	406	406	1	25.2017	0	0
C30x30-10-1_10_10_50-2_5-4.dat	2	5	6	(0,1)	C-7	Optimal	376	376	1	22.5798	0	0
C30x30-10-1_10_10_50-2_5-5.dat	2	4	5	(0,1)	C-7	Optimal	423	423	1	9.99742	0	0
C30x30-10-1_10_10_50-2_7-1.dat	2	7	8	(0,1)	C-7	Optimal	445	445	1	55.0292	0	0
C30x30-10-1_10_10_50-2_7-2.dat	2	6	7	(0,1)	C-7	Optimal	524	524	1	28.1758	0	0
C30x30-10-1_10_10_50-2_7-3.dat	2	7	8	(0,1)	C-7	Optimal	498	498	1	49.5292	0	0
C30x30-10-1_10_10_50-2_7-4.dat	2	6	7	(0,1)	C-7	Optimal	603	603	1	36.5832	0	0
C30x30-10-1_10_10_50-2_7-5.dat	2	6	7	(0,1)	C-7	Optimal	512	512	1	36.468	0	0
C30x30-20-1_10_10_20-2_5-1.dat	2	5	6	(0,1)	C-8	Optimal	727	727	1	43.7744	0	0
C30x30-20-1_10_10_20-2_5-2.dat	2	5	6	(0,1)	C-8	Optimal	589	589	1	33.246	0	0
C30x30-20-1_10_10_20-2_5-3.dat	2	4	5	(0,1)	C-8	Optimal	726	726	1	11.1243	0	0
C30x30-20-1_10_10_20-2_5-4.dat	2	4	5	(0,1)	C-8	Optimal	646	646	1	20.5312	0	0
C30x30-20-1_10_10_20-2_5-5.dat	2	4	5	(0,1)	C-8	Optimal	644	644	1	16.1893	0	0
C30x30-20-1_10_10_20-2_7-1.dat	2	7	8	(0,1)	C-8	Optimal	849	849	1	119.058	0	0
C30x30-20-1_10_10_20-2_7-2.dat	2	6	7	(0,1)	C-8	Optimal	791	791	1	98.673	0	0
C30x30-20-1_10_10_20-2_7-3.dat	2	7	8	(0,1)	C-8	Optimal	834	834	1	81.9582	0	0
C30x30-20-1_10_10_20-2_7-4.dat	2	7	8	(0,1)	C-8	Optimal	886	886	1	161.617	0	0
C30x30-20-1_10_10_20-2_7-5.dat	2	6	7	(0,1)	C-8	Optimal	973	973	1	103.825	0	0
C30x30-20-1_10_10_50-2_5-1.dat	2	5	6	(0,1)	C-8	Optimal	680	680	1	49.9897	0	0
C30x30-20-1_10_10_50-2_5-2.dat	2	5	6	(0,1)	C-8	Optimal	763	763	1	32.8439	0	0
C30x30-20-1_10_10_50-2_5-3.dat	2	4	5	(0,1)	C-8	Optimal	820	820	1	15.2048	0	0
C30x30-20-1_10_10_50-2_5-4.dat	2	5	6	(0,1)	C-8	Optimal	660	660	1	51.3382	0	0
C30x30-20-1_10_10_50-2_5-5.dat	2	5	6	(0,1)	C-8	Optimal	850	850	1	36.1546	0	0
C30x30-20-1_10_10_50-2_7-1.dat	2	6	7	(0,1)	C-8	Optimal	879	879	1	69.5008	0	0
C30x30-20-1_10_10_50-2_7-2.dat	2	6	7	(0,1)	C-8	Optimal	814	814	1	76.8931	0	0
C30x30-20-1_10_10_50-2_7-3.dat	2	7	8	(0,1)	C-8	Optimal	896	896	1	128.847	0	0
C30x30-20-1_10_10_50-2_7-4.dat	2	7	8	(0,1)	C-8	Optimal	912	912	1	131.664	0	0
C30x30-20-1_10_10_50-2_7-5.dat	2	7	8	(0,1)	C-8	Optimal	855	855	1	146.611	0	0
C30x30-30-1_10_10_20-2_5-1.dat	2	5	6	(0,1)	C-9	Optimal	1115	1115	1	63.536	0	0
C30x30-30-1_10_10_20-2_5-2.dat	2	5	6	(0,1)	C-9	Optimal	982	982	1	96.2427	0	0
C30x30-30-1_10_10_20-2_5-3.dat	2	5	6	(0,1)	C-9	Optimal	916	916	1	56.4295	0	0
C30x30-30-1_10_10_20-2_5-4.dat	2	5	6	(0,1)	C-9	Optimal	967	967	1	68.9174	0	0
C30x30-30-1_10_10_20-2_5-5.dat	2	5	6	(0,1)	C-9	Optimal	976	976	1	70.6057	0	0
C30x30-30-1_10_10_20-2_7-1.dat	2	7	8	(0,1)	C-9	Optimal	1123	1123	1	387.885	0	0
C30x30-30-1_10_10_20-2_7-2.dat	2	7	8	(0,1)	C-9	Optimal	1222	1222	1	609.952	0	0
C30x30-30-1_10_10_20-2_7-3.dat	2	7	8	(0,1)	C-9	Optimal	1312	1312	1	535.515	0	0
C30x30-30-1_10_10_20-2_7-4.dat	2	7	8	(0,1)	C-9	Optimal	1328	1328	1	516.233	0	0
C30x30-30-1_10_10_20-2_7-5.dat	2	6	7	(0,1)	C-9	Optimal	1210	1210	1	137.772	0	0
C30x30-30-1_10_10_50-2_5-1.dat	2	5	6	(0,1)	C-9	Optimal	1050	1050	1	54.0068	0	0
C30x30-30-1_10_10_50-2_5-2.dat	2	5	6	(0,1)	C-9	Optimal	950	950	1	56.8849	0	0
C30x30-30-1_10_10_50-2_5-3.dat	2	4	5	(0,1)	C-9	Optimal	1134	1134	1	19.8795	0	0
C30x30-30-1_10_10_50-2_5-4.dat	2	5	6	(0,1)	C-9	Optimal	995	995	1	60.2382	0	0
C30x30-30-1_10_10_50-2_5-5.dat	2	5	6	(0,1)	C-9	Optimal	972	972	1	63.7135	0	0
C30x30-30-1_10_10_50-2_7-1.dat	2	7	8	(0,1)	C-9	Optimal	1131	1131	1	184.787	0	0
C30x30-30-1_10_10_50-2_7-2.dat	2	7	8	(0,1)	C-9	Optimal	1060	1060	1	186.028	0	0
C30x30-30-1_10_10_50-2_7-3.dat	2	7	8	(0,1)	C-9	Optimal	1276	1276	1	192.035	0	0
C30x30-30-1_10_10_50-2_7-4.dat	2	7	8	(0,1)	C-9	Optimal	1059	1059	1	170.853	0	0
C30x30-30-1_10_10_50-2_7-5.dat	2	7	8	(0,1)	C-9	Optimal	1130	1130	1	180.026	0	0
C30x30-5-1_10_10_20-2_5-1.dat	2	4	5	(0,1)	C-6	Optimal	171	171	1	4.20869	0	0
C30x30-5-1_10_10_20-2_5-2.dat	2	4	5	(0,1)	C-6	Optimal	191	191	1	4.89216	0	0
C30x30-5-1_10_10_20-2_5-3.dat	2	4	5	(0,1)	C-6	Optimal	170	170	1	6.13182	0	0
C30x30-5-1_10_10_20-2_5-4.dat	2	3	4	(0,1)	C-6	Optimal	181	181	1	1.41218	0	0
C30x30-5-1_10_10_20-2_5-5.dat	2	4	5	(0,1)	C-6	Optimal	196	196	1	6.09707	0	0
C30x30-5-1_10_10_20-2_7-1.dat	2	4	5	(0,1)	C-6	Optimal	157	157	1	4.6421	0	0
C30x30-5-1_10_10_20-2_7-2.dat	2	5	6	(0,1)	C-6	Optimal	248	248	1	7.29648	0	0
C30x30-5-1_10_10_20-2_7-3.dat	2	6	7	(0,1)	C-6	Optimal	275	275	1	23.5217	0	0
C30x30-5-1_10_10_20-2_7-4.dat	2	6	7	(0,1)	C-6	Optimal	228	228	1	32.3893	0	0
C30x30-5-1_10_10_20-2_7-5.dat	2	5	6	(0,1)	C-6	Optimal	200	200	1	9.1263	0	0
C30x30-5-1_10_10_50-2_5-1.dat	2	3	4	(0,1)	C-6	Optimal	183	183	1	1.26171	0	0
C30x30-5-1_10_10_50-2_5-2.dat	2	4	5	(0,1)	C-6	Optimal	272	272	1	3.18578	0	0
C30x30-5-1_10_10_50-2_5-3.dat	2	4	5	(0,1)	C-6	Optimal	249	249	1	6.44267	0	0
C30x30-5-1_10_10_50-2_5-4.dat	2	3	4	(0,1)	C-6	Optimal	273	273	1	2.53015	0	0
C30x30-5-1_10_10_50-2_5-5.dat	2	4	5	(0,1)	C-6	Optimal	183	183	1	7.93286	0	0
C30x30-5-1_10_10_50-2_7-1.dat	2	7	8	(0,1)	C-6	Optimal	304	304	1	26.5895	0	0
C30x30-5-1_10_10_50-2_7-2.dat	2	6	7	(0,1)	C-6	Optimal	276	276	1	26.9084	0	0
C30x30-5-1_10_10_50-2_7-3.dat	2	5	6	(0,1)	C-6	Optimal	255	255	1	10.7095	0	0
C30x30-5-1_10_10_50-2_7-4.dat	2	6	7	(0,1)	C-6	Optimal	303	303	1	23.0889	0	0
C30x30-5-1_10_10_50-2_7-5.dat	2	6	7	(0,1)	C-6	Optimal	214	214	1	11.2836	0	0
D10x10-10-1_10_10_20-1.dat	2	8	9	(0,1)	D-4	Optimal	379	379	1	176.98	0	0
D10x10-10-1_10_10_20-2.dat	2	8	9	(0,1)	D-4	Optimal	265	265	1	217.844	0	0
D10x10-10-1_10_10_20-3.dat	2	9	10	(0,1)	D-4	Optimal	299	299	1	980.265	0	0
D10x10-10-1_10_10_20-4.dat	2	9	10	(0,1)	D-4	Optimal	323	323	1	453.609	0	0
D10x10-10-1_10_10_20-5.dat	2	7	8	(0,1)	D-4	Optimal	281	281	1	249.921	0	0
D10x10-10-1_10_10_50-1.dat	2	9	10	(0,1)	D-4	Optimal	258	258	1	288.271	0	0
D10x10-10-1_10_10_50-2.dat	2	9	10	(0,1)	D-4	Optimal	479	479	1	238.195	0	0
D10x10-10-1_10_10_50-3.dat	2	6	7	(0,1)	D-4	Optimal	298	298	1	101.953	0	0
D10x10-10-1_10_10_50-4.dat	2	8	9	(0,1)	D-4	Optimal	371	371	1	308.392	0	0
D10x10-10-1_10_10_50-5.dat	2	8	9	(0,1)	D-4	Optimal	372	372	1	306.828	0	0
D10x10-5-1_10_10_20-1.dat	2	9	10	(0,1)	D-3	Optimal	191	191	1	141.92	0	0
D10x10-5-1_10_10_20-2.dat	2	9	10	(0,1)	D-3	Optimal	177	177	1	62.8762	0	0
D10x10-5-1_10_10_20-3.dat	2	8	9	(0,1)	D-3	Optimal	206	206	1	30.3138	0	0
D10x10-5-1_10_10_20-4.dat	2	8	9	(0,1)	D-3	Optimal	171	171	1	48.8145	0	0
D10x10-5-1_10_10_20-5.dat	2	8	9	(0,1)	D-3	Optimal	138	138	1	44.7652	0	0
D10x10-5-1_10_10_50-1.dat	2	7	8	(0,1)	D-3	Optimal	103	103	1	20.0489	0	0
D10x10-5-1_10_10_50-2.dat	2	8	9	(0,1)	D-3	Optimal	235	235	1	45.2799	0	0
D10x10-5-1_10_10_50-3.dat	2	9	10	(0,1)	D-3	Optimal	421	421	1	43.3122	0	0
D10x10-5-1_10_10_50-4.dat	2	7	8	(0,1)	D-3	Optimal	275	275	1	19.2177	0	0
D10x10-5-1_10_10_50-5.dat	2	9	10	(0,1)	D-3	Optimal	164	164	1	40.9685	0	0
D20x20-5-1_10_10_20-1.dat	2	18	19	(0,1)	D-5	Optimal	360	360	1	885.257	0	0
D20x20-5-1_10_10_20-2.dat	2	14	15	(0,1)	D-5	Optimal	307	307	1	532.572	0	0
D20x20-5-1_10_10_20-3.dat	2	16	17	(0,1)	D-5	Optimal	285	285	1	2908.51	0	0
D20x20-5-1_10_10_20-4.dat	2	13	14	(0,1)	D-5	Optimal	236	236	1	173.435	0	0
D20x20-5-1_10_10_20-5.dat	2	16	17	(0,1)	D-5	Feasible	676	317.323	0	7200	0.530587	0
D20x20-5-1_10_10_50-1.dat	2	14	15	(0,1)	D-5	Optimal	743	743	1	185.82	0	0
D20x20-5-1_10_10_50-2.dat	2	12	13	(0,1)	D-5	Optimal	461	461	1	173.21	0	0
D20x20-5-1_10_10_50-3.dat	2	14	15	(0,1)	D-5	Optimal	406	406	1	242.205	0	0
D20x20-5-1_10_10_50-4.dat	2	14	15	(0,1)	D-5	Optimal	338	338	1	177.644	0	0
D20x20-5-1_10_10_50-5.dat	2	15	16	(0,1)	D-5	Optimal	457	457	1	337.926	0	0
D5x5-5-1_10_10_20-1.dat	2	4	5	(0,1)	D-1	Optimal	73	73	1	3.57295	0	0
D5x5-5-1_10_10_20-2.dat	2	3	4	(0,1)	D-1	Optimal	62	62	1	1.96318	0	0
D5x5-5-1_10_10_20-3.dat	2	4	5	(0,1)	D-1	Optimal	113	113	1	5.25115	0	0
D5x5-5-1_10_10_20-4.dat	2	4	5	(0,1)	D-1	Optimal	126	126	1	2.89927	0	0
D5x5-5-1_10_10_20-5.dat	2	4	5	(0,1)	D-1	Optimal	92	92	1	3.26963	0	0
D5x5-5-1_10_10_50-1.dat	2	4	5	(0,1)	D-1	Optimal	86	86	1	1.67765	0	0
D5x5-5-1_10_10_50-2.dat	2	4	5	(0,1)	D-1	Optimal	199	199	1	1.9863	0	0
D5x5-5-1_10_10_50-3.dat	2	4	5	(0,1)	D-1	Optimal	153	153	1	2.6628	0	0
D5x5-5-1_10_10_50-4.dat	2	4	5	(0,1)	D-1	Optimal	153	153	1	3.23617	0	0
D5x5-5-1_10_10_50-5.dat	2	3	4	(0,1)	D-1	Optimal	124	124	1	1.01931	0	0
D7x7-5-1_10_10_20-1.dat	2	6	7	(0,1)	D-2	Optimal	196	196	1	7.06282	0	0
D7x7-5-1_10_10_20-2.dat	2	5	6	(0,1)	D-2	Optimal	150	150	1	9.27419	0	0
D7x7-5-1_10_10_20-3.dat	2	4	5	(0,1)	D-2	Optimal	113	113	1	4.5666	0	0
D7x7-5-1_10_10_20-4.dat	2	5	6	(0,1)	D-2	Optimal	129	129	1	18.3237	0	0
D7x7-5-1_10_10_20-5.dat	2	6	7	(0,1)	D-2	Optimal	108	108	1	21.0144	0	0
D7x7-5-1_10_10_50-1.dat	2	6	7	(0,1)	D-2	Optimal	196	196	1	23.0434	0	0
D7x7-5-1_10_10_50-2.dat	2	4	5	(0,1)	D-2	Optimal	158	158	1	5.07582	0	0
D7x7-5-1_10_10_50-3.dat	2	5	6	(0,1)	D-2	Optimal	106	106	1	12.9379	0	0
D7x7-5-1_10_10_50-4.dat	2	6	7	(0,1)	D-2	Optimal	108	108	1	15.2211	0	0
D7x7-5-1_10_10_50-5.dat	2	5	6	(0,1)	D-2	Optimal	166	166	1	7.16014	0	0
E100-10-0.1-1.dat	2	7	8	(0,1)	E-10	Optimal	406	406	1	362.229	0	0
E100-10-0.1-2.dat	2	8	9	(0,1)	E-10	Optimal	425	425	1	392.971	0	0
E100-10-0.1-3.dat	2	9	10	(0,1)	E-10	Optimal	591	591	1	1144.19	0	0
E100-10-0.1-4.dat	2	6	7	(0,1)	E-10	Optimal	537	537	1	124.512	0	0
E100-10-0.1-5.dat	2	6	7	(0,1)	E-10	Optimal	461	461	1	217.421	0	0
E100-10-0.2-1.dat	2	5	6	(0,1)	E-12	Optimal	449	449	1	958.542	0	0
E100-10-0.2-2.dat	2	5	6	(0,1)	E-12	Optimal	488	488	1	1147.93	0	0
E100-10-0.2-3.dat	2	3	4	(0,1)	E-12	Optimal	345	345	1	115.1	0	1
E100-10-0.2-4.dat	2	6	7	(0,1)	E-12	Feasible	477	456.042	0	7200	0.0439364	0
E100-10-0.2-5.dat	2	5	6	(0,1)	E-12	Feasible	474	448.051	0	7200	0.0547454	0
E100-5-0.1-1.dat	2	5	6	(0,1)	E-9	Optimal	262	262	1	34.5188	0	0
E100-5-0.1-2.dat	2	5	6	(0,1)	E-9	Optimal	273	273	1	12.3269	0	0
E100-5-0.1-3.dat	2	5	6	(0,1)	E-9	Optimal	201	201	1	36.8625	0	0
E100-5-0.1-4.dat	2	5	6	(0,1)	E-9	Infeasible	1e+75	1e+75	1	1.54272	0	0
E100-5-0.1-5.dat	2	6	7	(0,1)	E-9	Optimal	243	243	1	23.0154	0	1
E100-5-0.2-1.dat	2	5	6	(0,1)	E-11	Optimal	295	295	1	85.7675	0	1
E100-5-0.2-2.dat	2	4	5	(0,1)	E-11	Optimal	233	233	1	43.3323	0	1
E100-5-0.2-3.dat	2	3	4	(0,1)	E-11	Optimal	371	371	1	11.9949	0	1
E100-5-0.2-4.dat	2	4	5	(0,1)	E-11	Optimal	230	230	1	85.909	0	1
E100-5-0.2-5.dat	2	4	5	(0,1)	E-11	Optimal	268	268	1	57.1714	0	1
E50-10-0.1-1.dat	2	7	8	(0,1)	E-2	Infeasible	1e+75	1e+75	1	3.44426	0	0
E50-10-0.1-2.dat	2	8	9	(0,1)	E-2	Infeasible	1e+75	1e+75	1	2.54655	0	0
E50-10-0.1-3.dat	2	8	9	(0,1)	E-2	Infeasible	1e+75	1e+75	1	3.8584	0	0
E50-10-0.1-4.dat	2	11	12	(0,1)	E-2	Optimal	491	491	1	27.668	0	0
E50-10-0.1-5.dat	2	9	10	(0,1)	E-2	Infeasible	1e+75	1e+75	1	3.33832	0	0
E50-10-0.2-1.dat	2	4	5	(0,1)	E-4	Optimal	355	355	1	51.8403	0	1
E50-10-0.2-2.dat	2	6	7	(0,1)	E-4	Optimal	517	517	1	145.563	0	0
E50-10-0.2-3.dat	2	5	6	(0,1)	E-4	Optimal	339	339	1	101.556	0	0
E50-10-0.2-4.dat	2	5	6	(0,1)	E-4	Optimal	419	419	1	71.7953	0	0
E50-10-0.2-5.dat	2	4	5	(0,1)	E-4	Optimal	315	315	1	158.215	0	0
E50-5-0.1-1.dat	2	6	7	(0,1)	E-1	Optimal	264	264	1	5.1313	0	0
E50-5-0.1-2.dat	2	8	9	(0,1)	E-1	Infeasible	1e+75	1e+75	1	0.675779	0	0
E50-5-0.1-3.dat	2	7	8	(0,1)	E-1	Optimal	222	222	1	4.24316	0	0
E50-5-0.1-4.dat	2	9	10	(0,1)	E-1	Optimal	409	409	1	6.97437	0	0
E50-5-0.1-5.dat	2	8	9	(0,1)	E-1	Infeasible	1e+75	1e+75	1	0.751136	0	0
E50-5-0.2-1.dat	2	4	5	(0,1)	E-3	Optimal	363	363	1	16.2514	0	0
E50-5-0.2-2.dat	2	6	7	(0,1)	E-3	Infeasible	1e+75	1e+75	1	1.60842	0	0
E50-5-0.2-3.dat	2	4	5	(0,1)	E-3	Optimal	289	289	1	2.618	0	0
E50-5-0.2-4.dat	2	4	5	(0,1)	E-3	Optimal	310	310	1	7.03369	0	0
E50-5-0.2-5.dat	2	5	6	(0,1)	E-3	Optimal	248	248	1	13.8124	0	1
E75-10-0.1-1.dat	2	8	9	(0,1)	E-6	Optimal	556	556	1	49.373	0	0
E75-10-0.1-2.dat	2	9	10	(0,1)	E-6	Optimal	459	459	1	171.686	0	0
E75-10-0.1-3.dat	2	6	7	(0,1)	E-6	Optimal	426	426	1	62.8345	0	0
E75-10-0.1-4.dat	2	12	13	(0,1)	E-6	Optimal	647	647	1	167.549	0	0
E75-10-0.1-5.dat	2	8	9	(0,1)	E-6	Optimal	501	501	1	184.842	0	0
E75-10-0.2-1.dat	2	4	5	(0,1)	E-8	Optimal	390	390	1	247.062	0	1
E75-10-0.2-2.dat	2	5	6	(0,1)	E-8	Optimal	389	389	1	189.129	0	0
E75-10-0.2-3.dat	2	5	6	(0,1)	E-8	Optimal	508	508	1	247.852	0	0
E75-10-0.2-4.dat	2	4	5	(0,1)	E-8	Optimal	441	441	1	242.585	0	0
E75-10-0.2-5.dat	2	5	6	(0,1)	E-8	Optimal	379	379	1	122.855	0	1
E75-5-0.1-1.dat	2	6	7	(0,1)	E-5	Optimal	258	258	1	23.0285	0	0
E75-5-0.1-2.dat	2	6	7	(0,1)	E-5	Infeasible	1e+75	1e+75	1	1.41611	0	0
E75-5-0.1-3.dat	2	5	6	(0,1)	E-5	Optimal	274	274	1	17.5483	0	0
E75-5-0.1-4.dat	2	6	7	(0,1)	E-5	Optimal	278	278	1	25.804	0	0
E75-5-0.1-5.dat	2	5	6	(0,1)	E-5	Optimal	266	266	1	8.4917	0	0
E75-5-0.2-1.dat	2	4	5	(0,1)	E-7	Optimal	231	231	1	37.2791	0	1
E75-5-0.2-2.dat	2	4	5	(0,1)	E-7	Optimal	273	273	1	19.808	0	1
E75-5-0.2-3.dat	2	3	4	(0,1)	E-7	Optimal	226	226	1	19.2839	0	1
E75-5-0.2-4.dat	2	6	7	(0,1)	E-7	Optimal	316	316	1	91.4075	0	0
E75-5-0.2-5.dat	2	5	6	(0,1)	E-7	Optimal	239	239	1	18.2447	0	0
RE100-10-0.1-1.dat	2	4	5	(0,1)	R-10	Optimal	951	951	1	2549.35	0	0
RE100-10-0.1-2.dat	2	4	5	(0,1)	R-10	Optimal	922	922	1	504.692	0	0
RE100-10-0.1-3.dat	2	4	5	(0,1)	R-10	Optimal	1262	1262	1	92.605	0	0
RE100-10-0.1-4.dat	2	4	5	(0,1)	R-10	Optimal	1172	1172	1	599.154	0	0
RE100-10-0.1-5.dat	2	4	5	(0,1)	R-10	Optimal	1139	1139	1	166.745	0	0
RE100-10-0.2-1.dat	2	3	4	(0,1)	R-12	Optimal	1416	1416	1	3442.77	0	0
RE100-10-0.2-2.dat	2	3	4	(0,1)	R-12	Optimal	1086	1086	1	398.017	0	0
RE100-10-0.2-3.dat	2	3	4	(0,1)	R-12	Optimal	1000	1000	1	216.433	0	0
RE100-10-0.2-4.dat	2	3	4	(0,1)	R-12	Optimal	1044	1044	1	585.74	0	1
RE100-10-0.2-5.dat	2	3	4	(0,1)	R-12	Optimal	867	867	1	200.992	0	0
RE100-5-0.1-1.dat	2	3	4	(0,1)	R-9	Optimal	612	612	1	5.86046	0	0
RE100-5-0.1-2.dat	2	3	4	(0,1)	R-9	Optimal	828	828	1	2.50395	0	0
RE100-5-0.1-3.dat	2	3	4	(0,1)	R-9	Optimal	559	559	1	13.4387	0	1
RE100-5-0.1-4.dat	2	5	6	(0,1)	R-9	Optimal	705	705	1	41.8605	0	0
RE100-5-0.1-5.dat	2	4	5	(0,1)	R-9	Optimal	731	731	1	26.371	0	0
RE100-5-0.2-1.dat	2	2	3	(0,1)	R-11	Optimal	952	952	1	0.521249	0	1
RE100-5-0.2-2.dat	2	2	3	(0,1)	R-11	Optimal	537	537	1	0.286768	0	1
RE100-5-0.2-3.dat	2	2	3	(0,1)	R-11	Optimal	655	655	1	0.487584	0	1
RE100-5-0.2-4.dat	2	2	3	(0,1)	R-11	Optimal	389	389	1	0.603093	0	1
RE100-5-0.2-5.dat	2	2	3	(0,1)	R-11	Optimal	893	893	1	0.598932	0	1
RE50-10-0.1-1.dat	2	4	5	(0,1)	R-2	Optimal	1415	1415	1	15.4983	0	0
RE50-10-0.1-2.dat	2	5	6	(0,1)	R-2	Optimal	1203	1203	1	23.4343	0	0
RE50-10-0.1-3.dat	2	6	7	(0,1)	R-2	Optimal	1243	1243	1	82.539	0	0
RE50-10-0.1-4.dat	2	6	7	(0,1)	R-2	Optimal	794	794	1	91.6771	0	0
RE50-10-0.1-5.dat	2	5	6	(0,1)	R-2	Optimal	1488	1488	1	51.2466	0	0
RE50-10-0.2-1.dat	2	3	4	(0,1)	R-4	Optimal	1185	1185	1	50.958	0	0
RE50-10-0.2-2.dat	2	3	4	(0,1)	R-4	Optimal	1526	1526	1	66.8105	0	1
RE50-10-0.2-3.dat	2	3	4	(0,1)	R-4	Optimal	1103	1103	1	86.5188	0	1
RE50-10-0.2-4.dat	2	3	4	(0,1)	R-4	Optimal	1173	1173	1	90.2689	0	1
RE50-10-0.2-5.dat	2	3	4	(0,1)	R-4	Optimal	1044	1044	1	70.363	0	1
RE50-5-0.1-1.dat	2	3	4	(0,1)	R-1	Infeasible	1e+75	1e+75	1	0.44889	0	0
RE50-5-0.1-2.dat	2	5	6	(0,1)	R-1	Optimal	655	655	1	10.9861	0	0
RE50-5-0.1-3.dat	2	5	6	(0,1)	R-1	Optimal	755	755	1	13.6783	0	0
RE50-5-0.1-4.dat	2	4	5	(0,1)	R-1	Optimal	879	879	1	4.65918	0	0
RE50-5-0.1-5.dat	2	6	7	(0,1)	R-1	Optimal	789	789	1	15.5945	0	0
RE50-5-0.2-1.dat	2	2	3	(0,1)	R-3	Optimal	561	561	1	0.193667	0	0
RE50-5-0.2-2.dat	2	3	4	(0,1)	R-3	Optimal	637	637	1	6.50185	0	1
RE50-5-0.2-3.dat	2	3	4	(0,1)	R-3	Optimal	641	641	1	7.42274	0	0
RE50-5-0.2-4.dat	2	3	4	(0,1)	R-3	Optimal	823	823	1	8.09918	0	0
RE50-5-0.2-5.dat	2	3	4	(0,1)	R-3	Optimal	757	757	1	4.648	0	0
RE75-10-0.1-1.dat	2	4	5	(0,1)	R-6	Optimal	1128	1128	1	268.797	0	0
RE75-10-0.1-2.dat	2	4	5	(0,1)	R-6	Optimal	1146	1146	1	196.424	0	0
RE75-10-0.1-3.dat	2	4	5	(0,1)	R-6	Optimal	1154	1154	1	40.4574	0	0
RE75-10-0.1-4.dat	2	4	5	(0,1)	R-6	Optimal	1239	1239	1	51.5367	0	0
RE75-10-0.1-5.dat	2	5	6	(0,1)	R-6	Optimal	1355	1355	1	349.792	0	0
RE75-10-0.2-1.dat	2	3	4	(0,1)	R-8	Optimal	1369	1369	1	116.022	0	0
RE75-10-0.2-2.dat	2	3	4	(0,1)	R-8	Optimal	1202	1202	1	85.9088	0	0
RE75-10-0.2-3.dat	2	3	4	(0,1)	R-8	Optimal	1348	1348	1	1553.86	0	0
RE75-10-0.2-4.dat	2	3	4	(0,1)	R-8	Optimal	1317	1317	1	922.643	0	0
RE75-10-0.2-5.dat	2	2	3	(0,1)	R-8	Optimal	2101	2101	1	0.527012	0	1
RE75-5-0.1-1.dat	2	4	5	(0,1)	R-5	Optimal	597	597	1	16.7901	0	0
RE75-5-0.1-2.dat	2	4	5	(0,1)	R-5	Optimal	791	791	1	9.58616	0	0
RE75-5-0.1-3.dat	2	4	5	(0,1)	R-5	Optimal	643	643	1	21.6594	0	0
RE75-5-0.1-4.dat	2	4	5	(0,1)	R-5	Optimal	407	407	1	14.9812	0	1
RE75-5-0.1-5.dat	2	3	4	(0,1)	R-5	Optimal	1100	1100	1	2.5003	0	0
RE75-5-0.2-1.dat	2	2	3	(0,1)	R-7	Optimal	776	776	1	0.559237	0	1
RE75-5-0.2-2.dat	2	3	4	(0,1)	R-7	Optimal	534	534	1	8.33158	0	0
RE75-5-0.2-3.dat	2	3	4	(0,1)	R-7	Optimal	748	748	1	29.2349	0	1
RE75-5-0.2-4.dat	2	3	4	(0,1)	R-7	Optimal	529	529	1	30.4044	0	1
RE75-5-0.2-5.dat	2	2	3	(0,1)	R-7	Optimal	526	526	1	0.626263	0	1
C10x10-10-1_10_10_20-2_5-1.dat	2	4	6	(0,2)	C-2	Optimal	290	290	1	24.8938	0	0
C10x10-10-1_10_10_20-2_5-2.dat	2	5	7	(0,2)	C-2	Optimal	287	287	1	19.1874	0	0
C10x10-10-1_10_10_20-2_5-3.dat	2	5	7	(0,2)	C-2	Optimal	283	283	1	55.9734	0	0
C10x10-10-1_10_10_20-2_5-4.dat	2	4	6	(0,2)	C-2	Optimal	200	200	1	8.11502	0	0
C10x10-10-1_10_10_20-2_5-5.dat	2	4	6	(0,2)	C-2	Optimal	211	211	1	11.8221	0	0
C10x10-10-1_10_10_20-2_7-1.dat	2	7	9	(0,2)	C-2	Optimal	315	315	1	111.185	0	0
C10x10-10-1_10_10_20-2_7-2.dat	2	6	8	(0,2)	C-2	Optimal	281	281	1	96.4213	0	0
C10x10-10-1_10_10_20-2_7-3.dat	2	6	8	(0,2)	C-2	Optimal	291	291	1	90.507	0	0
C10x10-10-1_10_10_20-2_7-4.dat	2	6	8	(0,2)	C-2	Optimal	320	320	1	73.8566	0	0
C10x10-10-1_10_10_20-2_7-5.dat	2	6	8	(0,2)	C-2	Optimal	282	282	1	65.4036	0	0
C10x10-10-1_10_10_50-2_5-1.dat	2	5	7	(0,2)	C-2	Optimal	262	262	1	14.493	0	0
C10x10-10-1_10_10_50-2_5-2.dat	2	4	6	(0,2)	C-2	Optimal	297	297	1	11.4271	0	0
C10x10-10-1_10_10_50-2_5-3.dat	2	5	7	(0,2)	C-2	Optimal	268	268	1	20.0926	0	0
C10x10-10-1_10_10_50-2_5-4.dat	2	4	6	(0,2)	C-2	Optimal	222	222	1	12.1212	0	0
C10x10-10-1_10_10_50-2_5-5.dat	2	4	6	(0,2)	C-2	Optimal	349	349	1	16.4978	0	0
C10x10-10-1_10_10_50-2_7-1.dat	2	7	9	(0,2)	C-2	Optimal	278	278	1	54.0321	0	0
C10x10-10-1_10_10_50-2_7-2.dat	2	6	8	(0,2)	C-2	Optimal	247	247	1	21.9076	0	0
C10x10-10-1_10_10_50-2_7-3.dat	2	7	9	(0,2)	C-2	Optimal	246	246	1	37.287	0	0
C10x10-10-1_10_10_50-2_7-4.dat	2	7	9	(0,2)	C-2	Optimal	264	264	1	90.0122	0	0
C10x10-10-1_10_10_50-2_7-5.dat	2	6	8	(0,2)	C-2	Optimal	337	337	1	37.5659	0	0
C10x10-5-1_10_10_20-2_5-1.dat	2	3	5	(0,2)	C-1	Optimal	156	156	1	2.62888	0	0
C10x10-5-1_10_10_20-2_5-2.dat	2	4	6	(0,2)	C-1	Optimal	212	212	1	13.0145	0	0
C10x10-5-1_10_10_20-2_5-3.dat	2	4	6	(0,2)	C-1	Optimal	196	196	1	11.4775	0	0
C10x10-5-1_10_10_20-2_5-4.dat	2	4	6	(0,2)	C-1	Optimal	152	152	1	5.35456	0	0
C10x10-5-1_10_10_20-2_5-5.dat	2	4	6	(0,2)	C-1	Optimal	130	130	1	4.71488	0	0
C10x10-5-1_10_10_20-2_7-1.dat	2	7	9	(0,2)	C-1	Optimal	157	157	1	27.8452	0	0
C10x10-5-1_10_10_20-2_7-2.dat	2	6	8	(0,2)	C-1	Optimal	151	151	1	32.4683	0	0
C10x10-5-1_10_10_20-2_7-3.dat	2	5	7	(0,2)	C-1	Optimal	186	186	1	13.2797	0	1
C10x10-5-1_10_10_20-2_7-4.dat	2	5	7	(0,2)	C-1	Optimal	187	187	1	18.4551	0	0
C10x10-5-1_10_10_20-2_7-5.dat	2	6	8	(0,2)	C-1	Optimal	165	165	1	11.8899	0	0
C10x10-5-1_10_10_50-2_5-1.dat	2	5	7	(0,2)	C-1	Optimal	131	131	1	10.8284	0	0
C10x10-5-1_10_10_50-2_5-2.dat	2	3	5	(0,2)	C-1	Optimal	216	216	1	7.35463	0	0
C10x10-5-1_10_10_50-2_5-3.dat	2	3	5	(0,2)	C-1	Optimal	127	127	1	2.64215	0	0
C10x10-5-1_10_10_50-2_5-4.dat	2	5	7	(0,2)	C-1	Optimal	180	180	1	13.7954	0	0
C10x10-5-1_10_10_50-2_5-5.dat	2	4	6	(0,2)	C-1	Optimal	182	182	1	10.149	0	0
C10x10-5-1_10_10_50-2_7-1.dat	2	5	7	(0,2)	C-1	Optimal	182	182	1	9.8931	0	0
C10x10-5-1_10_10_50-2_7-2.dat	2	6	8	(0,2)	C-1	Optimal	166	166	1	22.5414	0	0
C10x10-5-1_10_10_50-2_7-3.dat	2	6	8	(0,2)	C-1	Optimal	230	230	1	20.2301	0	0
C10x10-5-1_10_10_50-2_7-4.dat	2	5	7	(0,2)	C-1	Optimal	204	204	1	13.3647	0	0
C10x10-5-1_10_10_50-2_7-5.dat	2	4	6	(0,2)	C-1	Optimal	210	210	1	6.2869	0	0
C20x20-10-1_10_10_20-2_5-1.dat	2	5	7	(0,2)	C-4	Optimal	334	334	1	28.4555	0	0
C20x20-10-1_10_10_20-2_5-2.dat	2	4	6	(0,2)	C-4	Optimal	314	314	1	17.5066	0	0
C20x20-10-1_10_10_20-2_5-3.dat	2	5	7	(0,2)	C-4	Optimal	383	383	1	35.6772	0	0
C20x20-10-1_10_10_20-2_5-4.dat	2	5	7	(0,2)	C-4	Optimal	392	392	1	30.0902	0	0
C20x20-10-1_10_10_20-2_5-5.dat	2	4	6	(0,2)	C-4	Optimal	331	331	1	15.3919	0	0
C20x20-10-1_10_10_20-2_7-1.dat	2	7	9	(0,2)	C-4	Optimal	411	411	1	111.255	0	0
C20x20-10-1_10_10_20-2_7-2.dat	2	5	7	(0,2)	C-4	Optimal	488	488	1	60.3896	0	0
C20x20-10-1_10_10_20-2_7-3.dat	2	5	7	(0,2)	C-4	Optimal	402	402	1	29.6589	0	0
C20x20-10-1_10_10_20-2_7-4.dat	2	6	8	(0,2)	C-4	Optimal	390	390	1	39.1042	0	0
C20x20-10-1_10_10_20-2_7-5.dat	2	6	8	(0,2)	C-4	Optimal	310	310	1	60.945	0	0
C20x20-10-1_10_10_50-2_5-1.dat	2	5	7	(0,2)	C-4	Optimal	315	315	1	24.1116	0	0
C20x20-10-1_10_10_50-2_5-2.dat	2	4	6	(0,2)	C-4	Optimal	347	347	1	15.8225	0	0
C20x20-10-1_10_10_50-2_5-3.dat	2	5	7	(0,2)	C-4	Optimal	393	393	1	33.9906	0	0
C20x20-10-1_10_10_50-2_5-4.dat	2	5	7	(0,2)	C-4	Optimal	351	351	1	51.0317	0	0
C20x20-10-1_10_10_50-2_5-5.dat	2	4	6	(0,2)	C-4	Optimal	387	387	1	19.0472	0	0
C20x20-10-1_10_10_50-2_7-1.dat	2	5	7	(0,2)	C-4	Optimal	438	438	1	26.314	0	0
C20x20-10-1_10_10_50-2_7-2.dat	2	5	7	(0,2)	C-4	Optimal	461	461	1	25.4067	0	0
C20x20-10-1_10_10_50-2_7-3.dat	2	6	8	(0,2)	C-4	Optimal	456	456	1	45.8939	0	0
C20x20-10-1_10_10_50-2_7-4.dat	2	5	7	(0,2)	C-4	Optimal	406	406	1	24.653	0	0
C20x20-10-1_10_10_50-2_7-5.dat	2	5	7	(0,2)	C-4	Optimal	330	330	1	22.4963	0	1
C20x20-20-1_10_10_20-2_5-1.dat	2	5	7	(0,2)	C-5	Optimal	652	652	1	62.0526	0	0
C20x20-20-1_10_10_20-2_5-2.dat	2	5	7	(0,2)	C-5	Optimal	647	647	1	57.939	0	0
C20x20-20-1_10_10_20-2_5-3.dat	2	5	7	(0,2)	C-5	Optimal	622	622	1	59.8671	0	0
C20x20-20-1_10_10_20-2_5-4.dat	2	5	7	(0,2)	C-5	Optimal	664	664	1	82.6499	0	0
C20x20-20-1_10_10_20-2_5-5.dat	2	5	7	(0,2)	C-5	Optimal	696	696	1	42.9377	0	0
C20x20-20-1_10_10_20-2_7-1.dat	2	7	9	(0,2)	C-5	Optimal	753	753	1	6068.61	0	0
C20x20-20-1_10_10_20-2_7-2.dat	2	6	8	(0,2)	C-5	Optimal	702	702	1	107.325	0	0
C20x20-20-1_10_10_20-2_7-3.dat	2	7	9	(0,2)	C-5	Feasible	809	786.997	0	7200	0.027198	0
C20x20-20-1_10_10_20-2_7-4.dat	2	7	9	(0,2)	C-5	Optimal	631	631	1	206.671	0	0
C20x20-20-1_10_10_20-2_7-5.dat	2	6	8	(0,2)	C-5	Optimal	757	757	1	107.168	0	0
C20x20-20-1_10_10_50-2_5-1.dat	2	5	7	(0,2)	C-5	Optimal	580	580	1	38.8447	0	0
C20x20-20-1_10_10_50-2_5-2.dat	2	5	7	(0,2)	C-5	Optimal	653	653	1	55.6612	0	0
C20x20-20-1_10_10_50-2_5-3.dat	2	5	7	(0,2)	C-5	Optimal	580	580	1	51.3892	0	0
C20x20-20-1_10_10_50-2_5-4.dat	2	4	6	(0,2)	C-5	Optimal	715	715	1	31.6615	0	0
C20x20-20-1_10_10_50-2_5-5.dat	2	5	7	(0,2)	C-5	Optimal	606	606	1	51.0253	0	0
C20x20-20-1_10_10_50-2_7-1.dat	2	6	8	(0,2)	C-5	Optimal	729	729	1	115.123	0	0
C20x20-20-1_10_10_50-2_7-2.dat	2	7	9	(0,2)	C-5	Optimal	731	731	1	146.671	0	0
C20x20-20-1_10_10_50-2_7-3.dat	2	7	9	(0,2)	C-5	Optimal	760	760	1	319.553	0	0
C20x20-20-1_10_10_50-2_7-4.dat	2	6	8	(0,2)	C-5	Optimal	763	763	1	81.7195	0	0
C20x20-20-1_10_10_50-2_7-5.dat	2	7	9	(0,2)	C-5	Optimal	653	653	1	121.072	0	0
C20x20-5-1_10_10_20-2_5-1.dat	2	4	6	(0,2)	C-3	Optimal	169	169	1	9.83894	0	0
C20x20-5-1_10_10_20-2_5-2.dat	2	3	5	(0,2)	C-3	Optimal	177	177	1	4.81791	0	1
C20x20-5-1_10_10_20-2_5-3.dat	2	4	6	(0,2)	C-3	Optimal	196	196	1	11.5321	0	0
C20x20-5-1_10_10_20-2_5-4.dat	2	4	6	(0,2)	C-3	Optimal	214	214	1	10.9818	0	0
C20x20-5-1_10_10_20-2_5-5.dat	2	4	6	(0,2)	C-3	Optimal	191	191	1	10.7723	0	0
C20x20-5-1_10_10_20-2_7-1.dat	2	7	9	(0,2)	C-3	Optimal	197	197	1	19.1512	0	1
C20x20-5-1_10_10_20-2_7-2.dat	2	6	8	(0,2)	C-3	Optimal	244	244	1	26.2404	0	0
C20x20-5-1_10_10_20-2_7-3.dat	2	6	8	(0,2)	C-3	Optimal	213	213	1	18.8668	0	0
C20x20-5-1_10_10_20-2_7-4.dat	2	7	9	(0,2)	C-3	Optimal	207	207	1	23.5973	0	0
C20x20-5-1_10_10_20-2_7-5.dat	2	6	8	(0,2)	C-3	Optimal	193	193	1	24.7612	0	1
C20x20-5-1_10_10_50-2_5-1.dat	2	3	5	(0,2)	C-3	Optimal	219	219	1	2.54474	0	0
C20x20-5-1_10_10_50-2_5-2.dat	2	4	6	(0,2)	C-3	Optimal	217	217	1	9.89313	0	0
C20x20-5-1_10_10_50-2_5-3.dat	2	5	7	(0,2)	C-3	Optimal	213	213	1	20.3077	0	0
C20x20-5-1_10_10_50-2_5-4.dat	2	3	5	(0,2)	C-3	Optimal	159	159	1	3.3084	0	0
C20x20-5-1_10_10_50-2_5-5.dat	2	4	6	(0,2)	C-3	Optimal	211	211	1	6.72492	0	0
C20x20-5-1_10_10_50-2_7-1.dat	2	5	7	(0,2)	C-3	Optimal	251	251	1	21.2925	0	0
C20x20-5-1_10_10_50-2_7-2.dat	2	3	5	(0,2)	C-3	Optimal	196	196	1	3.20317	0	0
C20x20-5-1_10_10_50-2_7-3.dat	2	7	9	(0,2)	C-3	Optimal	293	293	1	26.583	0	0
C20x20-5-1_10_10_50-2_7-4.dat	2	5	7	(0,2)	C-3	Optimal	235	235	1	16.9605	0	0
C20x20-5-1_10_10_50-2_7-5.dat	2	4	6	(0,2)	C-3	Optimal	200	200	1	8.94667	0	0
C30x30-10-1_10_10_20-2_5-1.dat	2	5	7	(0,2)	C-7	Optimal	394	394	1	29.5339	0	0
C30x30-10-1_10_10_20-2_5-2.dat	2	5	7	(0,2)	C-7	Optimal	389	389	1	30.0353	0	0
C30x30-10-1_10_10_20-2_5-3.dat	2	5	7	(0,2)	C-7	Optimal	365	365	1	25.0645	0	0
C30x30-10-1_10_10_20-2_5-4.dat	2	5	7	(0,2)	C-7	Optimal	408	408	1	32.8721	0	0
C30x30-10-1_10_10_20-2_5-5.dat	2	4	6	(0,2)	C-7	Optimal	406	406	1	22.0678	0	0
C30x30-10-1_10_10_20-2_7-1.dat	2	5	7	(0,2)	C-7	Optimal	497	497	1	30.9743	0	0
C30x30-10-1_10_10_20-2_7-2.dat	2	5	7	(0,2)	C-7	Optimal	431	431	1	58.13	0	0
C30x30-10-1_10_10_20-2_7-3.dat	2	7	9	(0,2)	C-7	Optimal	506	506	1	96.5187	0	0
C30x30-10-1_10_10_20-2_7-4.dat	2	7	9	(0,2)	C-7	Optimal	428	428	1	113.238	0	0
C30x30-10-1_10_10_20-2_7-5.dat	2	6	8	(0,2)	C-7	Optimal	514	514	1	39.0405	0	0
C30x30-10-1_10_10_50-2_5-1.dat	2	4	6	(0,2)	C-7	Optimal	316	316	1	17.1487	0	0
C30x30-10-1_10_10_50-2_5-2.dat	2	4	6	(0,2)	C-7	Optimal	411	411	1	19.0927	0	0
C30x30-10-1_10_10_50-2_5-3.dat	2	5	7	(0,2)	C-7	Optimal	405	405	1	40.9153	0	0
C30x30-10-1_10_10_50-2_5-4.dat	2	5	7	(0,2)	C-7	Optimal	346	346	1	29.1571	0	0
C30x30-10-1_10_10_50-2_5-5.dat	2	4	6	(0,2)	C-7	Optimal	413	413	1	21.0118	0	0
C30x30-10-1_10_10_50-2_7-1.dat	2	7	9	(0,2)	C-7	Optimal	422	422	1	68.0437	0	0
C30x30-10-1_10_10_50-2_7-2.dat	2	6	8	(0,2)	C-7	Optimal	516	516	1	49.2024	0	0
C30x30-10-1_10_10_50-2_7-3.dat	2	7	9	(0,2)	C-7	Optimal	489	489	1	70.4608	0	0
C30x30-10-1_10_10_50-2_7-4.dat	2	6	8	(0,2)	C-7	Optimal	571	571	1	90.9077	0	0
C30x30-10-1_10_10_50-2_7-5.dat	2	6	8	(0,2)	C-7	Optimal	485	485	1	51.0028	0	0
C30x30-20-1_10_10_20-2_5-1.dat	2	5	7	(0,2)	C-8	Optimal	715	715	1	67.5723	0	0
C30x30-20-1_10_10_20-2_5-2.dat	2	5	7	(0,2)	C-8	Optimal	584	584	1	42.682	0	0
C30x30-20-1_10_10_20-2_5-3.dat	2	4	6	(0,2)	C-8	Optimal	704	704	1	28.7786	0	0
C30x30-20-1_10_10_20-2_5-4.dat	2	4	6	(0,2)	C-8	Optimal	618	618	1	31.1285	0	0
C30x30-20-1_10_10_20-2_5-5.dat	2	4	6	(0,2)	C-8	Optimal	604	604	1	38.3709	0	0
C30x30-20-1_10_10_20-2_7-1.dat	2	7	9	(0,2)	C-8	Optimal	821	821	1	156.031	0	0
C30x30-20-1_10_10_20-2_7-2.dat	2	6	8	(0,2)	C-8	Optimal	754	754	1	115.767	0	0
C30x30-20-1_10_10_20-2_7-3.dat	2	7	9	(0,2)	C-8	Optimal	829	829	1	115.56	0	0
C30x30-20-1_10_10_20-2_7-4.dat	2	7	9	(0,2)	C-8	Optimal	863	863	1	330.612	0	0
C30x30-20-1_10_10_20-2_7-5.dat	2	6	8	(0,2)	C-8	Optimal	920	920	1	144.869	0	0
C30x30-20-1_10_10_50-2_5-1.dat	2	5	7	(0,2)	C-8	Optimal	629	629	1	51.2428	0	0
C30x30-20-1_10_10_50-2_5-2.dat	2	5	7	(0,2)	C-8	Optimal	706	706	1	47.6839	0	0
C30x30-20-1_10_10_50-2_5-3.dat	2	4	6	(0,2)	C-8	Optimal	773	773	1	28.8931	0	0
C30x30-20-1_10_10_50-2_5-4.dat	2	5	7	(0,2)	C-8	Optimal	631	631	1	41.9525	0	0
C30x30-20-1_10_10_50-2_5-5.dat	2	5	7	(0,2)	C-8	Optimal	750	750	1	55.657	0	0
C30x30-20-1_10_10_50-2_7-1.dat	2	6	8	(0,2)	C-8	Optimal	862	862	1	92.158	0	0
C30x30-20-1_10_10_50-2_7-2.dat	2	6	8	(0,2)	C-8	Optimal	797	797	1	90.0267	0	0
C30x30-20-1_10_10_50-2_7-3.dat	2	7	9	(0,2)	C-8	Optimal	874	874	1	154.881	0	0
C30x30-20-1_10_10_50-2_7-4.dat	2	7	9	(0,2)	C-8	Optimal	874	874	1	204.961	0	0
C30x30-20-1_10_10_50-2_7-5.dat	2	7	9	(0,2)	C-8	Optimal	807	807	1	169.372	0	0
C30x30-30-1_10_10_20-2_5-1.dat	2	5	7	(0,2)	C-9	Optimal	1082	1082	1	95.0224	0	0
C30x30-30-1_10_10_20-2_5-2.dat	2	5	7	(0,2)	C-9	Optimal	953	953	1	160.23	0	0
C30x30-30-1_10_10_20-2_5-3.dat	2	5	7	(0,2)	C-9	Optimal	895	895	1	96.7243	0	0
C30x30-30-1_10_10_20-2_5-4.dat	2	5	7	(0,2)	C-9	Optimal	942	942	1	91.4816	0	0
C30x30-30-1_10_10_20-2_5-5.dat	2	5	7	(0,2)	C-9	Optimal	954	954	1	111.755	0	0
C30x30-30-1_10_10_20-2_7-1.dat	2	7	9	(0,2)	C-9	Optimal	1070	1070	1	886.299	0	0
C30x30-30-1_10_10_20-2_7-2.dat	2	7	9	(0,2)	C-9	Optimal	1172	1172	1	3589.66	0	0
C30x30-30-1_10_10_20-2_7-3.dat	2	7	9	(0,2)	C-9	Feasible	1260	1247.78	0	7200	0.00969975	0
C30x30-30-1_10_10_20-2_7-4.dat	2	7	9	(0,2)	C-9	Optimal	1272	1272	1	6873.08	0	0
C30x30-30-1_10_10_20-2_7-5.dat	2	6	8	(0,2)	C-9	Optimal	1150	1150	1	182.714	0	0
C30x30-30-1_10_10_50-2_5-1.dat	2	5	7	(0,2)	C-9	Optimal	1000	1000	1	83.3773	0	0
C30x30-30-1_10_10_50-2_5-2.dat	2	5	7	(0,2)	C-9	Optimal	933	933	1	89.5511	0	0
C30x30-30-1_10_10_50-2_5-3.dat	2	4	6	(0,2)	C-9	Optimal	1070	1070	1	52.9984	0	0
C30x30-30-1_10_10_50-2_5-4.dat	2	5	7	(0,2)	C-9	Optimal	935	935	1	80.8373	0	0
C30x30-30-1_10_10_50-2_5-5.dat	2	5	7	(0,2)	C-9	Optimal	908	908	1	96.7919	0	0
C30x30-30-1_10_10_50-2_7-1.dat	2	7	9	(0,2)	C-9	Optimal	1096	1096	1	308.594	0	0
C30x30-30-1_10_10_50-2_7-2.dat	2	7	9	(0,2)	C-9	Optimal	999	999	1	253.232	0	0
C30x30-30-1_10_10_50-2_7-3.dat	2	7	9	(0,2)	C-9	Optimal	1200	1200	1	319.318	0	0
C30x30-30-1_10_10_50-2_7-4.dat	2	7	9	(0,2)	C-9	Optimal	1022	1022	1	443.167	0	0
C30x30-30-1_10_10_50-2_7-5.dat	2	7	9	(0,2)	C-9	Optimal	1081	1081	1	238.594	0	0
C30x30-5-1_10_10_20-2_5-1.dat	2	4	6	(0,2)	C-6	Optimal	166	166	1	10.3675	0	0
C30x30-5-1_10_10_20-2_5-2.dat	2	4	6	(0,2)	C-6	Optimal	188	188	1	8.69011	0	1
C30x30-5-1_10_10_20-2_5-3.dat	2	4	6	(0,2)	C-6	Optimal	164	164	1	9.71297	0	0
C30x30-5-1_10_10_20-2_5-4.dat	2	3	5	(0,2)	C-6	Optimal	175	175	1	6.01164	0	1
C30x30-5-1_10_10_20-2_5-5.dat	2	4	6	(0,2)	C-6	Optimal	192	192	1	17.7245	0	0
C30x30-5-1_10_10_20-2_7-1.dat	2	4	6	(0,2)	C-6	Optimal	154	154	1	9.42998	0	1
C30x30-5-1_10_10_20-2_7-2.dat	2	5	7	(0,2)	C-6	Optimal	236	236	1	13.8145	0	0
C30x30-5-1_10_10_20-2_7-3.dat	2	6	8	(0,2)	C-6	Optimal	256	256	1	31.8773	0	0
C30x30-5-1_10_10_20-2_7-4.dat	2	6	8	(0,2)	C-6	Optimal	220	220	1	35.9119	0	0
C30x30-5-1_10_10_20-2_7-5.dat	2	5	7	(0,2)	C-6	Optimal	198	198	1	15.8987	0	1
C30x30-5-1_10_10_50-2_5-1.dat	2	3	5	(0,2)	C-6	Optimal	179	179	1	4.15182	0	0
C30x30-5-1_10_10_50-2_5-2.dat	2	4	6	(0,2)	C-6	Optimal	259	259	1	14.2816	0	0
C30x30-5-1_10_10_50-2_5-3.dat	2	4	6	(0,2)	C-6	Optimal	224	224	1	20.7635	0	1
C30x30-5-1_10_10_50-2_5-4.dat	2	3	5	(0,2)	C-6	Optimal	272	272	1	3.14666	0	0
C30x30-5-1_10_10_50-2_5-5.dat	2	4	6	(0,2)	C-6	Optimal	181	181	1	12.0448	0	1
C30x30-5-1_10_10_50-2_7-1.dat	2	7	9	(0,2)	C-6	Optimal	293	293	1	27.6035	0	0
C30x30-5-1_10_10_50-2_7-2.dat	2	6	8	(0,2)	C-6	Optimal	265	265	1	27.8026	0	1
C30x30-5-1_10_10_50-2_7-3.dat	2	5	7	(0,2)	C-6	Optimal	255	255	1	16.4313	0	1
C30x30-5-1_10_10_50-2_7-4.dat	2	6	8	(0,2)	C-6	Optimal	279	279	1	23.2638	0	0
C30x30-5-1_10_10_50-2_7-5.dat	2	6	8	(0,2)	C-6	Optimal	209	209	1	15.8999	0	0
D10x10-10-1_10_10_20-1.dat	2	8	10	(0,2)	D-4	Optimal	343	343	1	340.756	0	0
D10x10-10-1_10_10_20-2.dat	2	8	10	(0,2)	D-4	Optimal	240	240	1	208.135	0	0
D10x10-10-1_10_10_20-3.dat	2	9	11	(0,2)	D-4	Optimal	280	280	1	993.623	0	0
D10x10-10-1_10_10_20-4.dat	2	9	11	(0,2)	D-4	Optimal	308	308	1	609.762	0	0
D10x10-10-1_10_10_20-5.dat	2	7	9	(0,2)	D-4	Optimal	266	266	1	218.278	0	0
D10x10-10-1_10_10_50-1.dat	2	9	11	(0,2)	D-4	Optimal	227	227	1	292.276	0	0
D10x10-10-1_10_10_50-2.dat	2	9	11	(0,2)	D-4	Optimal	453	453	1	318.309	0	0
D10x10-10-1_10_10_50-3.dat	2	6	8	(0,2)	D-4	Optimal	271	271	1	121.362	0	0
D10x10-10-1_10_10_50-4.dat	2	8	10	(0,2)	D-4	Optimal	338	338	1	343.792	0	0
D10x10-10-1_10_10_50-5.dat	2	8	10	(0,2)	D-4	Optimal	343	343	1	231.415	0	0
D10x10-5-1_10_10_20-1.dat	2	9	11	(0,2)	D-3	Optimal	176	176	1	135.47	0	0
D10x10-5-1_10_10_20-2.dat	2	9	11	(0,2)	D-3	Optimal	166	166	1	47.8589	0	0
D10x10-5-1_10_10_20-3.dat	2	8	10	(0,2)	D-3	Optimal	193	193	1	27.9843	0	0
D10x10-5-1_10_10_20-4.dat	2	8	10	(0,2)	D-3	Optimal	161	161	1	52.4718	0	0
D10x10-5-1_10_10_20-5.dat	2	8	10	(0,2)	D-3	Optimal	128	128	1	43.3586	0	0
D10x10-5-1_10_10_50-1.dat	2	7	9	(0,2)	D-3	Optimal	90	90	1	17.0343	0	0
D10x10-5-1_10_10_50-2.dat	2	8	10	(0,2)	D-3	Optimal	225	225	1	52.9796	0	0
D10x10-5-1_10_10_50-3.dat	2	9	11	(0,2)	D-3	Optimal	391	391	1	49.4852	0	0
D10x10-5-1_10_10_50-4.dat	2	7	9	(0,2)	D-3	Optimal	265	265	1	24.366	0	0
D10x10-5-1_10_10_50-5.dat	2	9	11	(0,2)	D-3	Optimal	158	158	1	51.6169	0	0
D20x20-5-1_10_10_20-1.dat	2	18	20	(0,2)	D-5	Optimal	346	346	1	6737.18	0	0
D20x20-5-1_10_10_20-2.dat	2	14	16	(0,2)	D-5	Optimal	285	285	1	1105.6	0	0
D20x20-5-1_10_10_20-3.dat	2	16	18	(0,2)	D-5	Feasible	312	266.724	0	7200	0.145114	0
D20x20-5-1_10_10_20-4.dat	2	13	15	(0,2)	D-5	Optimal	220	220	1	178.063	0	0
D20x20-5-1_10_10_20-5.dat	2	16	18	(0,2)	D-5	Feasible	385	318.911	0	7200	0.17166	0
D20x20-5-1_10_10_50-1.dat	2	14	16	(0,2)	D-5	Optimal	703	703	1	387.328	0	0
D20x20-5-1_10_10_50-2.dat	2	12	14	(0,2)	D-5	Optimal	430	430	1	200.308	0	0
D20x20-5-1_10_10_50-3.dat	2	14	16	(0,2)	D-5	Optimal	376	376	1	296.287	0	0
D20x20-5-1_10_10_50-4.dat	2	14	16	(0,2)	D-5	Optimal	314	314	1	302.795	0	0
D20x20-5-1_10_10_50-5.dat	2	15	17	(0,2)	D-5	Optimal	431	431	1	286.196	0	0
D5x5-5-1_10_10_20-1.dat	2	4	6	(0,2)	D-1	Optimal	66	66	1	4.18414	0	0
D5x5-5-1_10_10_20-2.dat	2	3	5	(0,2)	D-1	Optimal	58	58	1	1.78662	0	0
D5x5-5-1_10_10_20-3.dat	2	4	6	(0,2)	D-1	Optimal	107	107	1	5.79128	0	0
D5x5-5-1_10_10_20-4.dat	2	4	6	(0,2)	D-1	Optimal	111	111	1	3.3571	0	0
D5x5-5-1_10_10_20-5.dat	2	4	6	(0,2)	D-1	Optimal	90	90	1	9.59868	0	0
D5x5-5-1_10_10_50-1.dat	2	4	6	(0,2)	D-1	Optimal	81	81	1	2.18157	0	0
D5x5-5-1_10_10_50-2.dat	2	4	6	(0,2)	D-1	Optimal	182	182	1	3.98511	0	0
D5x5-5-1_10_10_50-3.dat	2	4	6	(0,2)	D-1	Optimal	147	147	1	4.48325	0	0
D5x5-5-1_10_10_50-4.dat	2	4	6	(0,2)	D-1	Optimal	137	137	1	4.57822	0	0
D5x5-5-1_10_10_50-5.dat	2	3	5	(0,2)	D-1	Optimal	117	117	1	3.20009	0	0
D7x7-5-1_10_10_20-1.dat	2	6	8	(0,2)	D-2	Optimal	187	187	1	17.8183	0	0
D7x7-5-1_10_10_20-2.dat	2	5	7	(0,2)	D-2	Optimal	143	143	1	16.9848	0	0
D7x7-5-1_10_10_20-3.dat	2	4	6	(0,2)	D-2	Optimal	109	109	1	8.72786	0	0
D7x7-5-1_10_10_20-4.dat	2	5	7	(0,2)	D-2	Optimal	118	118	1	18.3236	0	0
D7x7-5-1_10_10_20-5.dat	2	6	8	(0,2)	D-2	Optimal	103	103	1	24.8236	0	0
D7x7-5-1_10_10_50-1.dat	2	6	8	(0,2)	D-2	Optimal	182	182	1	26.1477	0	0
D7x7-5-1_10_10_50-2.dat	2	4	6	(0,2)	D-2	Optimal	144	144	1	12.2837	0	0
D7x7-5-1_10_10_50-3.dat	2	5	7	(0,2)	D-2	Optimal	90	90	1	8.66234	0	0
D7x7-5-1_10_10_50-4.dat	2	6	8	(0,2)	D-2	Optimal	105	105	1	8.51272	0	0
D7x7-5-1_10_10_50-5.dat	2	5	7	(0,2)	D-2	Optimal	144	144	1	12.224	0	0
E100-10-0.1-1.dat	2	7	9	(0,2)	E-10	Optimal	374	374	1	475.191	0	0
E100-10-0.1-2.dat	2	8	10	(0,2)	E-10	Optimal	393	393	1	499.839	0	0
E100-10-0.1-3.dat	2	9	11	(0,2)	E-10	Optimal	539	539	1	531.475	0	0
E100-10-0.1-4.dat	2	6	8	(0,2)	E-10	Optimal	458	458	1	134.408	0	0
E100-10-0.1-5.dat	2	6	8	(0,2)	E-10	Optimal	415	415	1	240.261	0	0
E100-10-0.2-1.dat	2	5	7	(0,2)	E-12	Optimal	420	420	1	831.207	0	0
E100-10-0.2-2.dat	2	5	7	(0,2)	E-12	Optimal	468	468	1	1170.06	0	0
E100-10-0.2-3.dat	2	3	5	(0,2)	E-12	Optimal	337	337	1	219.048	0	0
E100-10-0.2-4.dat	2	6	8	(0,2)	E-12	Feasible	442	428.752	0	7200	0.0299726	0
E100-10-0.2-5.dat	2	5	7	(0,2)	E-12	Optimal	424	424	1	5535.06	0	0
E100-5-0.1-1.dat	2	5	7	(0,2)	E-9	Optimal	239	239	1	45.3419	0	0
E100-5-0.1-2.dat	2	5	7	(0,2)	E-9	Optimal	268	268	1	41.8307	0	1
E100-5-0.1-3.dat	2	5	7	(0,2)	E-9	Optimal	185	185	1	28.5731	0	1
E100-5-0.1-4.dat	2	5	7	(0,2)	E-9	Optimal	325	325	1	13.4739	0	0
E100-5-0.1-5.dat	2	6	8	(0,2)	E-9	Optimal	240	240	1	32.9328	0	1
E100-5-0.2-1.dat	2	5	7	(0,2)	E-11	Optimal	280	280	1	167.208	0	0
E100-5-0.2-2.dat	2	4	6	(0,2)	E-11	Optimal	225	225	1	70.5323	0	1
E100-5-0.2-3.dat	2	3	5	(0,2)	E-11	Optimal	319	319	1	19.2051	0	1
E100-5-0.2-4.dat	2	4	6	(0,2)	E-11	Optimal	216	216	1	63.5913	0	1
E100-5-0.2-5.dat	2	4	6	(0,2)	E-11	Optimal	261	261	1	160.24	0	1
E50-10-0.1-1.dat	2	7	9	(0,2)	E-2	Optimal	443	443	1	36.7375	0	0
E50-10-0.1-2.dat	2	8	10	(0,2)	E-2	Infeasible	1e+75	1e+75	1	2.98516	0	0
E50-10-0.1-3.dat	2	8	10	(0,2)	E-2	Optimal	456	456	1	25.0969	0	0
E50-10-0.1-4.dat	2	11	13	(0,2)	E-2	Optimal	486	486	1	51.3275	0	0
E50-10-0.1-5.dat	2	9	11	(0,2)	E-2	Infeasible	1e+75	1e+75	1	3.52735	0	0
E50-10-0.2-1.dat	2	4	6	(0,2)	E-4	Optimal	326	326	1	119.318	0	1
E50-10-0.2-2.dat	2	6	8	(0,2)	E-4	Optimal	487	487	1	188.283	0	0
E50-10-0.2-3.dat	2	5	7	(0,2)	E-4	Optimal	337	337	1	150.669	0	1
E50-10-0.2-4.dat	2	5	7	(0,2)	E-4	Optimal	409	409	1	120.152	0	0
E50-10-0.2-5.dat	2	4	6	(0,2)	E-4	Optimal	295	295	1	117.121	0	1
E50-5-0.1-1.dat	2	6	8	(0,2)	E-1	Optimal	226	226	1	6.8477	0	0
E50-5-0.1-2.dat	2	8	10	(0,2)	E-1	Optimal	388	388	1	5.62118	0	0
E50-5-0.1-3.dat	2	7	9	(0,2)	E-1	Optimal	221	221	1	9.70111	0	0
E50-5-0.1-4.dat	2	9	11	(0,2)	E-1	Optimal	392	392	1	10.049	0	0
E50-5-0.1-5.dat	2	8	10	(0,2)	E-1	Optimal	373	373	1	5.31971	0	0
E50-5-0.2-1.dat	2	4	6	(0,2)	E-3	Optimal	316	316	1	15.6395	0	0
E50-5-0.2-2.dat	2	6	8	(0,2)	E-3	Optimal	355	355	1	26.0003	0	0
E50-5-0.2-3.dat	2	4	6	(0,2)	E-3	Optimal	263	263	1	8.20838	0	1
E50-5-0.2-4.dat	2	4	6	(0,2)	E-3	Optimal	296	296	1	10.8092	0	0
E50-5-0.2-5.dat	2	5	7	(0,2)	E-3	Optimal	237	237	1	12.5404	0	1
E75-10-0.1-1.dat	2	8	10	(0,2)	E-6	Optimal	511	511	1	71.8197	0	0
E75-10-0.1-2.dat	2	9	11	(0,2)	E-6	Optimal	421	421	1	245.713	0	0
E75-10-0.1-3.dat	2	6	8	(0,2)	E-6	Optimal	396	396	1	125.652	0	0
E75-10-0.1-4.dat	2	12	14	(0,2)	E-6	Optimal	606	606	1	244.136	0	0
E75-10-0.1-5.dat	2	8	10	(0,2)	E-6	Optimal	472	472	1	203.672	0	0
E75-10-0.2-1.dat	2	4	6	(0,2)	E-8	Optimal	360	360	1	262.378	0	1
E75-10-0.2-2.dat	2	5	7	(0,2)	E-8	Optimal	369	369	1	191.873	0	0
E75-10-0.2-3.dat	2	5	7	(0,2)	E-8	Optimal	498	498	1	474.706	0	0
E75-10-0.2-4.dat	2	4	6	(0,2)	E-8	Optimal	423	423	1	325.325	0	0
E75-10-0.2-5.dat	2	5	7	(0,2)	E-8	Optimal	359	359	1	235.279	0	1
E75-5-0.1-1.dat	2	6	8	(0,2)	E-5	Optimal	239	239	1	15.9395	0	0
E75-5-0.1-2.dat	2	6	8	(0,2)	E-5	Infeasible	1e+75	1e+75	1	1.6157	0	0
E75-5-0.1-3.dat	2	5	7	(0,2)	E-5	Optimal	254	254	1	24.1789	0	0
E75-5-0.1-4.dat	2	6	8	(0,2)	E-5	Optimal	260	260	1	25.2006	0	0
E75-5-0.1-5.dat	2	5	7	(0,2)	E-5	Optimal	239	239	1	13.2459	0	0
E75-5-0.2-1.dat	2	4	6	(0,2)	E-7	Optimal	229	229	1	45.915	0	1
E75-5-0.2-2.dat	2	4	6	(0,2)	E-7	Optimal	249	249	1	20.4354	0	1
E75-5-0.2-3.dat	2	3	5	(0,2)	E-7	Optimal	206	206	1	38.2122	0	1
E75-5-0.2-4.dat	2	6	8	(0,2)	E-7	Optimal	292	292	1	78.792	0	0
E75-5-0.2-5.dat	2	5	7	(0,2)	E-7	Optimal	239	239	1	48.3156	0	0
RE100-10-0.1-1.dat	2	4	6	(0,2)	R-10	Optimal	868	868	1	1498.58	0	0
RE100-10-0.1-2.dat	2	4	6	(0,2)	R-10	Optimal	851	851	1	1040.96	0	0
RE100-10-0.1-3.dat	2	4	6	(0,2)	R-10	Optimal	1176	1176	1	133.311	0	0
RE100-10-0.1-4.dat	2	4	6	(0,2)	R-10	Optimal	1067	1067	1	319.684	0	0
RE100-10-0.1-5.dat	2	4	6	(0,2)	R-10	Optimal	927	927	1	134.831	0	0
RE100-10-0.2-1.dat	2	3	5	(0,2)	R-12	Optimal	1245	1245	1	301.21	0	0
RE100-10-0.2-2.dat	2	3	5	(0,2)	R-12	Optimal	999	999	1	653.84	0	0
RE100-10-0.2-3.dat	2	3	5	(0,2)	R-12	Optimal	939	939	1	330.925	0	1
RE100-10-0.2-4.dat	2	3	5	(0,2)	R-12	Optimal	940	940	1	904.582	0	1
RE100-10-0.2-5.dat	2	3	5	(0,2)	R-12	Optimal	856	856	1	590.48	0	0
RE100-5-0.1-1.dat	2	3	5	(0,2)	R-9	Optimal	533	533	1	25.0153	0	0
RE100-5-0.1-2.dat	2	3	5	(0,2)	R-9	Optimal	723	723	1	23.1318	0	1
RE100-5-0.1-3.dat	2	3	5	(0,2)	R-9	Optimal	532	532	1	30.0924	0	1
RE100-5-0.1-4.dat	2	5	7	(0,2)	R-9	Optimal	705	705	1	20.1984	0	0
RE100-5-0.1-5.dat	2	4	6	(0,2)	R-9	Optimal	630	630	1	26.0686	0	0
RE100-5-0.2-1.dat	2	2	4	(0,2)	R-11	Optimal	736	736	1	3.1132	0	1
RE100-5-0.2-2.dat	2	2	4	(0,2)	R-11	Optimal	478	478	1	4.42608	0	1
RE100-5-0.2-3.dat	2	2	4	(0,2)	R-11	Optimal	510	510	1	4.02263	0	1
RE100-5-0.2-4.dat	2	2	4	(0,2)	R-11	Optimal	339	339	1	4.52807	0	1
RE100-5-0.2-5.dat	2	2	4	(0,2)	R-11	Optimal	702	702	1	3.8225	0	1
RE50-10-0.1-1.dat	2	4	6	(0,2)	R-2	Optimal	1208	1208	1	17.3449	0	0
RE50-10-0.1-2.dat	2	5	7	(0,2)	R-2	Optimal	1066	1066	1	37.2486	0	0
RE50-10-0.1-3.dat	2	6	8	(0,2)	R-2	Optimal	1150	1150	1	105.871	0	0
RE50-10-0.1-4.dat	2	6	8	(0,2)	R-2	Optimal	745	745	1	133.008	0	0
RE50-10-0.1-5.dat	2	5	7	(0,2)	R-2	Optimal	1205	1205	1	57.3902	0	0
RE50-10-0.2-1.dat	2	3	5	(0,2)	R-4	Optimal	1030	1030	1	60.8204	0	0
RE50-10-0.2-2.dat	2	3	5	(0,2)	R-4	Optimal	1348	1348	1	91.6407	0	1
RE50-10-0.2-3.dat	2	3	5	(0,2)	R-4	Optimal	1010	1010	1	137.62	0	1
RE50-10-0.2-4.dat	2	3	5	(0,2)	R-4	Optimal	1003	1003	1	108.997	0	1
RE50-10-0.2-5.dat	2	3	5	(0,2)	R-4	Optimal	982	982	1	72.5713	0	1
RE50-5-0.1-1.dat	2	3	5	(0,2)	R-1	Optimal	468	468	1	2.19668	0	0
RE50-5-0.1-2.dat	2	5	7	(0,2)	R-1	Optimal	594	594	1	36.3673	0	0
RE50-5-0.1-3.dat	2	5	7	(0,2)	R-1	Optimal	620	620	1	15.0385	0	0
RE50-5-0.1-4.dat	2	4	6	(0,2)	R-1	Optimal	588	588	1	3.46346	0	0
RE50-5-0.1-5.dat	2	6	8	(0,2)	R-1	Optimal	772	772	1	20.1078	0	0
RE50-5-0.2-1.dat	2	2	4	(0,2)	R-3	Optimal	473	473	1	1.40085	0	1
RE50-5-0.2-2.dat	2	3	5	(0,2)	R-3	Optimal	544	544	1	12.459	0	1
RE50-5-0.2-3.dat	2	3	5	(0,2)	R-3	Optimal	575	575	1	13.8675	0	0
RE50-5-0.2-4.dat	2	3	5	(0,2)	R-3	Optimal	702	702	1	18.4226	0	1
RE50-5-0.2-5.dat	2	3	5	(0,2)	R-3	Optimal	704	704	1	20.6298	0	0
RE75-10-0.1-1.dat	2	4	6	(0,2)	R-6	Optimal	1062	1062	1	444.377	0	0
RE75-10-0.1-2.dat	2	4	6	(0,2)	R-6	Optimal	980	980	1	128.993	0	0
RE75-10-0.1-3.dat	2	4	6	(0,2)	R-6	Optimal	1057	1057	1	191.524	0	0
RE75-10-0.1-4.dat	2	4	6	(0,2)	R-6	Optimal	1085	1085	1	103.138	0	0
RE75-10-0.1-5.dat	2	5	7	(0,2)	R-6	Optimal	1149	1149	1	277.472	0	0
RE75-10-0.2-1.dat	2	3	5	(0,2)	R-8	Optimal	1279	1279	1	128.096	0	0
RE75-10-0.2-2.dat	2	3	5	(0,2)	R-8	Optimal	1130	1130	1	173.831	0	1
RE75-10-0.2-3.dat	2	3	5	(0,2)	R-8	Optimal	1147	1147	1	226.735	0	1
RE75-10-0.2-4.dat	2	3	5	(0,2)	R-8	Optimal	1221	1221	1	370.863	0	0
RE75-10-0.2-5.dat	2	2	4	(0,2)	R-8	Optimal	1976	1976	1	11.1776	0	1
RE75-5-0.1-1.dat	2	4	6	(0,2)	R-5	Optimal	525	525	1	13.4882	0	0
RE75-5-0.1-2.dat	2	4	6	(0,2)	R-5	Optimal	617	617	1	8.70714	0	0
RE75-5-0.1-3.dat	2	4	6	(0,2)	R-5	Optimal	556	556	1	25.0114	0	0
RE75-5-0.1-4.dat	2	4	6	(0,2)	R-5	Optimal	379	379	1	20.5738	0	1
RE75-5-0.1-5.dat	2	3	5	(0,2)	R-5	Optimal	809	809	1	7.14786	0	0
RE75-5-0.2-1.dat	2	2	4	(0,2)	R-7	Optimal	665	665	1	2.62304	0	1
RE75-5-0.2-2.dat	2	3	5	(0,2)	R-7	Optimal	459	459	1	18.1331	0	1
RE75-5-0.2-3.dat	2	3	5	(0,2)	R-7	Optimal	679	679	1	68.7223	0	1
RE75-5-0.2-4.dat	2	3	5	(0,2)	R-7	Optimal	476	476	1	22.621	0	1
RE75-5-0.2-5.dat	2	2	4	(0,2)	R-7	Optimal	412	412	1	2.5346	0	1
C10x10-10-1_10_10_20-2_5-1.dat	2	5	5	(1,0)	C-2	Optimal	294	294	1	9.91917	0	0
C10x10-10-1_10_10_20-2_5-2.dat	2	6	6	(1,0)	C-2	Optimal	297	297	1	20.2522	0	0
C10x10-10-1_10_10_20-2_5-3.dat	2	6	6	(1,0)	C-2	Optimal	304	304	1	34.6612	0	0
C10x10-10-1_10_10_20-2_5-4.dat	2	5	5	(1,0)	C-2	Optimal	229	229	1	14.8368	0	0
C10x10-10-1_10_10_20-2_5-5.dat	2	5	5	(1,0)	C-2	Optimal	216	216	1	8.08548	0	0
C10x10-10-1_10_10_20-2_7-1.dat	2	8	8	(1,0)	C-2	Optimal	331	331	1	168.597	0	0
C10x10-10-1_10_10_20-2_7-2.dat	2	7	7	(1,0)	C-2	Optimal	298	298	1	65.4694	0	0
C10x10-10-1_10_10_20-2_7-3.dat	2	7	7	(1,0)	C-2	Optimal	304	304	1	116.962	0	0
C10x10-10-1_10_10_20-2_7-4.dat	2	7	7	(1,0)	C-2	Optimal	348	348	1	62.8155	0	0
C10x10-10-1_10_10_20-2_7-5.dat	2	7	7	(1,0)	C-2	Optimal	298	298	1	68.449	0	0
C10x10-10-1_10_10_50-2_5-1.dat	2	6	6	(1,0)	C-2	Optimal	284	284	1	13.2217	0	0
C10x10-10-1_10_10_50-2_5-2.dat	2	5	5	(1,0)	C-2	Optimal	320	320	1	6.16551	0	0
C10x10-10-1_10_10_50-2_5-3.dat	2	6	6	(1,0)	C-2	Optimal	300	300	1	22.7666	0	0
C10x10-10-1_10_10_50-2_5-4.dat	2	5	5	(1,0)	C-2	Optimal	222	222	1	8.03907	0	0
C10x10-10-1_10_10_50-2_5-5.dat	2	5	5	(1,0)	C-2	Optimal	391	391	1	8.2767	0	0
C10x10-10-1_10_10_50-2_7-1.dat	2	8	8	(1,0)	C-2	Optimal	306	306	1	57.6792	0	0
C10x10-10-1_10_10_50-2_7-2.dat	2	7	7	(1,0)	C-2	Optimal	262	262	1	35.9647	0	0
C10x10-10-1_10_10_50-2_7-3.dat	2	8	8	(1,0)	C-2	Optimal	256	256	1	44.6375	0	0
C10x10-10-1_10_10_50-2_7-4.dat	2	8	8	(1,0)	C-2	Optimal	285	285	1	119.332	0	0
C10x10-10-1_10_10_50-2_7-5.dat	2	7	7	(1,0)	C-2	Optimal	346	346	1	41.5633	0	0
C10x10-5-1_10_10_20-2_5-1.dat	2	4	4	(1,0)	C-1	Optimal	154	154	1	1.95694	0	0
C10x10-5-1_10_10_20-2_5-2.dat	2	5	5	(1,0)	C-1	Optimal	209	209	1	6.91888	0	0
C10x10-5-1_10_10_20-2_5-3.dat	2	5	5	(1,0)	C-1	Optimal	200	200	1	4.43722	0	0
C10x10-5-1_10_10_20-2_5-4.dat	2	5	5	(1,0)	C-1	Optimal	157	157	1	5.02256	0	0
C10x10-5-1_10_10_20-2_5-5.dat	2	5	5	(1,0)	C-1	Optimal	148	148	1	3.42807	0	0
C10x10-5-1_10_10_20-2_7-1.dat	2	8	8	(1,0)	C-1	Optimal	169	169	1	32.384	0	0
C10x10-5-1_10_10_20-2_7-2.dat	2	7	7	(1,0)	C-1	Optimal	164	164	1	33.4538	0	0
C10x10-5-1_10_10_20-2_7-3.dat	2	6	6	(1,0)	C-1	Optimal	192	192	1	15.6908	0	0
C10x10-5-1_10_10_20-2_7-4.dat	2	6	6	(1,0)	C-1	Optimal	180	180	1	11.2261	0	0
C10x10-5-1_10_10_20-2_7-5.dat	2	7	7	(1,0)	C-1	Optimal	166	166	1	12.3501	0	0
C10x10-5-1_10_10_50-2_5-1.dat	2	6	6	(1,0)	C-1	Optimal	148	148	1	9.1701	0	0
C10x10-5-1_10_10_50-2_5-2.dat	2	4	4	(1,0)	C-1	Optimal	220	220	1	2.22973	0	0
C10x10-5-1_10_10_50-2_5-3.dat	2	4	4	(1,0)	C-1	Optimal	137	137	1	2.19634	0	0
C10x10-5-1_10_10_50-2_5-4.dat	2	6	6	(1,0)	C-1	Optimal	213	213	1	15.3576	0	0
C10x10-5-1_10_10_50-2_5-5.dat	2	5	5	(1,0)	C-1	Optimal	173	173	1	5.72542	0	0
C10x10-5-1_10_10_50-2_7-1.dat	2	6	6	(1,0)	C-1	Optimal	174	174	1	11.1028	0	0
C10x10-5-1_10_10_50-2_7-2.dat	2	7	7	(1,0)	C-1	Optimal	176	176	1	28.2405	0	0
C10x10-5-1_10_10_50-2_7-3.dat	2	7	7	(1,0)	C-1	Optimal	250	250	1	26.0725	0	0
C10x10-5-1_10_10_50-2_7-4.dat	2	6	6	(1,0)	C-1	Optimal	237	237	1	19.6549	0	0
C10x10-5-1_10_10_50-2_7-5.dat	2	5	5	(1,0)	C-1	Optimal	202	202	1	5.39061	0	0
C20x20-10-1_10_10_20-2_5-1.dat	2	6	6	(1,0)	C-4	Optimal	347	347	1	22.0704	0	0
C20x20-10-1_10_10_20-2_5-2.dat	2	5	5	(1,0)	C-4	Optimal	320	320	1	9.31337	0	0
C20x20-10-1_10_10_20-2_5-3.dat	2	6	6	(1,0)	C-4	Optimal	393	393	1	35.7125	0	0
C20x20-10-1_10_10_20-2_5-4.dat	2	6	6	(1,0)	C-4	Optimal	410	410	1	33.1156	0	0
C20x20-10-1_10_10_20-2_5-5.dat	2	5	5	(1,0)	C-4	Optimal	336	336	1	9.28498	0	0
C20x20-10-1_10_10_20-2_7-1.dat	2	8	8	(1,0)	C-4	Optimal	430	430	1	86.8238	0	0
C20x20-10-1_10_10_20-2_7-2.dat	2	6	6	(1,0)	C-4	Optimal	495	495	1	26.6249	0	0
C20x20-10-1_10_10_20-2_7-3.dat	2	6	6	(1,0)	C-4	Optimal	403	403	1	25.8658	0	0
C20x20-10-1_10_10_20-2_7-4.dat	2	7	7	(1,0)	C-4	Optimal	412	412	1	43.9368	0	0
C20x20-10-1_10_10_20-2_7-5.dat	2	7	7	(1,0)	C-4	Optimal	315	315	1	44.6441	0	0
C20x20-10-1_10_10_50-2_5-1.dat	2	6	6	(1,0)	C-4	Optimal	342	342	1	24.5799	0	0
C20x20-10-1_10_10_50-2_5-2.dat	2	5	5	(1,0)	C-4	Optimal	316	316	1	10.4084	0	0
C20x20-10-1_10_10_50-2_5-3.dat	2	6	6	(1,0)	C-4	Optimal	427	427	1	31.9987	0	0
C20x20-10-1_10_10_50-2_5-4.dat	2	6	6	(1,0)	C-4	Optimal	378	378	1	22.9659	0	0
C20x20-10-1_10_10_50-2_5-5.dat	2	5	5	(1,0)	C-4	Optimal	397	397	1	12.0911	0	0
C20x20-10-1_10_10_50-2_7-1.dat	2	6	6	(1,0)	C-4	Optimal	421	421	1	24.41	0	0
C20x20-10-1_10_10_50-2_7-2.dat	2	6	6	(1,0)	C-4	Optimal	484	484	1	32.0704	0	0
C20x20-10-1_10_10_50-2_7-3.dat	2	7	7	(1,0)	C-4	Optimal	465	465	1	57.103	0	0
C20x20-10-1_10_10_50-2_7-4.dat	2	6	6	(1,0)	C-4	Optimal	420	420	1	30.6055	0	0
C20x20-10-1_10_10_50-2_7-5.dat	2	6	6	(1,0)	C-4	Optimal	316	316	1	27.043	0	0
C20x20-20-1_10_10_20-2_5-1.dat	2	6	6	(1,0)	C-5	Optimal	655	655	1	47.9255	0	0
C20x20-20-1_10_10_20-2_5-2.dat	2	6	6	(1,0)	C-5	Optimal	671	671	1	56.647	0	0
C20x20-20-1_10_10_20-2_5-3.dat	2	6	6	(1,0)	C-5	Optimal	662	662	1	51.8418	0	0
C20x20-20-1_10_10_20-2_5-4.dat	2	6	6	(1,0)	C-5	Optimal	683	683	1	59.8984	0	0
C20x20-20-1_10_10_20-2_5-5.dat	2	6	6	(1,0)	C-5	Optimal	729	729	1	32.5656	0	0
C20x20-20-1_10_10_20-2_7-1.dat	2	8	8	(1,0)	C-5	Optimal	798	798	1	512.056	0	0
C20x20-20-1_10_10_20-2_7-2.dat	2	7	7	(1,0)	C-5	Optimal	718	718	1	83.2148	0	0
C20x20-20-1_10_10_20-2_7-3.dat	2	8	8	(1,0)	C-5	Optimal	837	837	1	5973.07	0	0
C20x20-20-1_10_10_20-2_7-4.dat	2	8	8	(1,0)	C-5	Optimal	651	651	1	177.627	0	0
C20x20-20-1_10_10_20-2_7-5.dat	2	7	7	(1,0)	C-5	Optimal	771	771	1	78.3012	0	0
C20x20-20-1_10_10_50-2_5-1.dat	2	6	6	(1,0)	C-5	Optimal	630	630	1	33.9287	0	0
C20x20-20-1_10_10_50-2_5-2.dat	2	6	6	(1,0)	C-5	Optimal	713	713	1	52.8965	0	0
C20x20-20-1_10_10_50-2_5-3.dat	2	6	6	(1,0)	C-5	Optimal	623	623	1	45.9312	0	0
C20x20-20-1_10_10_50-2_5-4.dat	2	5	5	(1,0)	C-5	Optimal	705	705	1	27.7357	0	0
C20x20-20-1_10_10_50-2_5-5.dat	2	6	6	(1,0)	C-5	Optimal	628	628	1	40.1017	0	0
C20x20-20-1_10_10_50-2_7-1.dat	2	7	7	(1,0)	C-5	Optimal	740	740	1	72.7162	0	0
C20x20-20-1_10_10_50-2_7-2.dat	2	8	8	(1,0)	C-5	Optimal	764	764	1	102.692	0	0
C20x20-20-1_10_10_50-2_7-3.dat	2	8	8	(1,0)	C-5	Optimal	793	793	1	145.671	0	0
C20x20-20-1_10_10_50-2_7-4.dat	2	7	7	(1,0)	C-5	Optimal	747	747	1	67.5783	0	0
C20x20-20-1_10_10_50-2_7-5.dat	2	8	8	(1,0)	C-5	Optimal	670	670	1	86.5434	0	0
C20x20-5-1_10_10_20-2_5-1.dat	2	5	5	(1,0)	C-3	Optimal	166	166	1	5.83728	0	0
C20x20-5-1_10_10_20-2_5-2.dat	2	4	4	(1,0)	C-3	Optimal	189	189	1	1.87879	0	0
C20x20-5-1_10_10_20-2_5-3.dat	2	5	5	(1,0)	C-3	Optimal	198	198	1	6.07419	0	0
C20x20-5-1_10_10_20-2_5-4.dat	2	5	5	(1,0)	C-3	Optimal	211	211	1	5.95147	0	0
C20x20-5-1_10_10_20-2_5-5.dat	2	5	5	(1,0)	C-3	Optimal	198	198	1	3.79126	0	0
C20x20-5-1_10_10_20-2_7-1.dat	2	8	8	(1,0)	C-3	Optimal	197	197	1	23.312	0	0
C20x20-5-1_10_10_20-2_7-2.dat	2	7	7	(1,0)	C-3	Optimal	246	246	1	20.9244	0	0
C20x20-5-1_10_10_20-2_7-3.dat	2	7	7	(1,0)	C-3	Optimal	217	217	1	18.7186	0	0
C20x20-5-1_10_10_20-2_7-4.dat	2	8	8	(1,0)	C-3	Optimal	211	211	1	24.3805	0	0
C20x20-5-1_10_10_20-2_7-5.dat	2	7	7	(1,0)	C-3	Optimal	199	199	1	26.1025	0	0
C20x20-5-1_10_10_50-2_5-1.dat	2	4	4	(1,0)	C-3	Optimal	189	189	1	2.21325	0	0
C20x20-5-1_10_10_50-2_5-2.dat	2	5	5	(1,0)	C-3	Optimal	245	245	1	6.0611	0	0
C20x20-5-1_10_10_50-2_5-3.dat	2	6	6	(1,0)	C-3	Optimal	228	228	1	17.0517	0	0
C20x20-5-1_10_10_50-2_5-4.dat	2	4	4	(1,0)	C-3	Optimal	182	182	1	3.04867	0	0
C20x20-5-1_10_10_50-2_5-5.dat	2	5	5	(1,0)	C-3	Optimal	211	211	1	6.72322	0	0
C20x20-5-1_10_10_50-2_7-1.dat	2	6	6	(1,0)	C-3	Optimal	250	250	1	15.3873	0	0
C20x20-5-1_10_10_50-2_7-2.dat	2	4	4	(1,0)	C-3	Optimal	194	194	1	3.14735	0	0
C20x20-5-1_10_10_50-2_7-3.dat	2	8	8	(1,0)	C-3	Optimal	312	312	1	23.705	0	0
C20x20-5-1_10_10_50-2_7-4.dat	2	6	6	(1,0)	C-3	Optimal	241	241	1	12.2707	0	0
C20x20-5-1_10_10_50-2_7-5.dat	2	5	5	(1,0)	C-3	Optimal	215	215	1	6.49562	0	0
C30x30-10-1_10_10_20-2_5-1.dat	2	6	6	(1,0)	C-7	Optimal	397	397	1	33.5141	0	0
C30x30-10-1_10_10_20-2_5-2.dat	2	6	6	(1,0)	C-7	Optimal	397	397	1	28.5735	0	0
C30x30-10-1_10_10_20-2_5-3.dat	2	6	6	(1,0)	C-7	Optimal	371	371	1	29.6853	0	0
C30x30-10-1_10_10_20-2_5-4.dat	2	6	6	(1,0)	C-7	Optimal	421	421	1	35.8122	0	0
C30x30-10-1_10_10_20-2_5-5.dat	2	5	5	(1,0)	C-7	Optimal	402	402	1	11.127	0	0
C30x30-10-1_10_10_20-2_7-1.dat	2	6	6	(1,0)	C-7	Optimal	500	500	1	29.7734	0	0
C30x30-10-1_10_10_20-2_7-2.dat	2	6	6	(1,0)	C-7	Optimal	444	444	1	31.2039	0	0
C30x30-10-1_10_10_20-2_7-3.dat	2	8	8	(1,0)	C-7	Optimal	519	519	1	87.7889	0	0
C30x30-10-1_10_10_20-2_7-4.dat	2	8	8	(1,0)	C-7	Optimal	437	437	1	79.9013	0	0
C30x30-10-1_10_10_20-2_7-5.dat	2	7	7	(1,0)	C-7	Optimal	516	516	1	40.3581	0	0
C30x30-10-1_10_10_50-2_5-1.dat	2	5	5	(1,0)	C-7	Optimal	312	312	1	12.4148	0	0
C30x30-10-1_10_10_50-2_5-2.dat	2	5	5	(1,0)	C-7	Optimal	400	400	1	13.3605	0	0
C30x30-10-1_10_10_50-2_5-3.dat	2	6	6	(1,0)	C-7	Optimal	404	404	1	34.1692	0	0
C30x30-10-1_10_10_50-2_5-4.dat	2	6	6	(1,0)	C-7	Optimal	373	373	1	27.8224	0	0
C30x30-10-1_10_10_50-2_5-5.dat	2	5	5	(1,0)	C-7	Optimal	390	390	1	12.6805	0	0
C30x30-10-1_10_10_50-2_7-1.dat	2	8	8	(1,0)	C-7	Optimal	441	441	1	56.1029	0	0
C30x30-10-1_10_10_50-2_7-2.dat	2	7	7	(1,0)	C-7	Optimal	504	504	1	34.9484	0	0
C30x30-10-1_10_10_50-2_7-3.dat	2	8	8	(1,0)	C-7	Optimal	492	492	1	69.419	0	0
C30x30-10-1_10_10_50-2_7-4.dat	2	7	7	(1,0)	C-7	Optimal	568	568	1	49.2895	0	0
C30x30-10-1_10_10_50-2_7-5.dat	2	7	7	(1,0)	C-7	Optimal	503	503	1	48.4844	0	0
C30x30-20-1_10_10_20-2_5-1.dat	2	6	6	(1,0)	C-8	Optimal	725	725	1	55.8019	0	0
C30x30-20-1_10_10_20-2_5-2.dat	2	6	6	(1,0)	C-8	Optimal	589	589	1	40.963	0	0
C30x30-20-1_10_10_20-2_5-3.dat	2	5	5	(1,0)	C-8	Optimal	715	715	1	18.2383	0	0
C30x30-20-1_10_10_20-2_5-4.dat	2	5	5	(1,0)	C-8	Optimal	631	631	1	19.8743	0	0
C30x30-20-1_10_10_20-2_5-5.dat	2	5	5	(1,0)	C-8	Optimal	642	642	1	27.4406	0	0
C30x30-20-1_10_10_20-2_7-1.dat	2	8	8	(1,0)	C-8	Optimal	849	849	1	136.658	0	0
C30x30-20-1_10_10_20-2_7-2.dat	2	7	7	(1,0)	C-8	Optimal	773	773	1	102.904	0	0
C30x30-20-1_10_10_20-2_7-3.dat	2	8	8	(1,0)	C-8	Optimal	834	834	1	96.9133	0	0
C30x30-20-1_10_10_20-2_7-4.dat	2	8	8	(1,0)	C-8	Optimal	886	886	1	214.517	0	0
C30x30-20-1_10_10_20-2_7-5.dat	2	7	7	(1,0)	C-8	Optimal	969	969	1	140.996	0	0
C30x30-20-1_10_10_50-2_5-1.dat	2	6	6	(1,0)	C-8	Optimal	680	680	1	46.7615	0	0
C30x30-20-1_10_10_50-2_5-2.dat	2	6	6	(1,0)	C-8	Optimal	763	763	1	40.9979	0	0
C30x30-20-1_10_10_50-2_5-3.dat	2	5	5	(1,0)	C-8	Optimal	748	748	1	16.2715	0	0
C30x30-20-1_10_10_50-2_5-4.dat	2	6	6	(1,0)	C-8	Optimal	660	660	1	51.1525	0	0
C30x30-20-1_10_10_50-2_5-5.dat	2	6	6	(1,0)	C-8	Optimal	850	850	1	51.698	0	0
C30x30-20-1_10_10_50-2_7-1.dat	2	7	7	(1,0)	C-8	Optimal	844	844	1	78.0259	0	0
C30x30-20-1_10_10_50-2_7-2.dat	2	7	7	(1,0)	C-8	Optimal	775	775	1	77.477	0	0
C30x30-20-1_10_10_50-2_7-3.dat	2	8	8	(1,0)	C-8	Optimal	893	893	1	143.761	0	0
C30x30-20-1_10_10_50-2_7-4.dat	2	8	8	(1,0)	C-8	Optimal	905	905	1	145.135	0	0
C30x30-20-1_10_10_50-2_7-5.dat	2	8	8	(1,0)	C-8	Optimal	852	852	1	156.078	0	0
C30x30-30-1_10_10_20-2_5-1.dat	2	6	6	(1,0)	C-9	Optimal	1115	1115	1	75.0244	0	0
C30x30-30-1_10_10_20-2_5-2.dat	2	6	6	(1,0)	C-9	Optimal	982	982	1	118.612	0	0
C30x30-30-1_10_10_20-2_5-3.dat	2	6	6	(1,0)	C-9	Optimal	916	916	1	80.3684	0	0
C30x30-30-1_10_10_20-2_5-4.dat	2	6	6	(1,0)	C-9	Optimal	967	967	1	74.0008	0	0
C30x30-30-1_10_10_20-2_5-5.dat	2	6	6	(1,0)	C-9	Optimal	970	970	1	85.5949	0	0
C30x30-30-1_10_10_20-2_7-1.dat	2	8	8	(1,0)	C-9	Optimal	1108	1108	1	352.108	0	0
C30x30-30-1_10_10_20-2_7-2.dat	2	8	8	(1,0)	C-9	Optimal	1214	1214	1	533.641	0	0
C30x30-30-1_10_10_20-2_7-3.dat	2	8	8	(1,0)	C-9	Optimal	1311	1311	1	529.095	0	0
C30x30-30-1_10_10_20-2_7-4.dat	2	8	8	(1,0)	C-9	Optimal	1322	1322	1	470.437	0	0
C30x30-30-1_10_10_20-2_7-5.dat	2	7	7	(1,0)	C-9	Optimal	1189	1189	1	133.984	0	0
C30x30-30-1_10_10_50-2_5-1.dat	2	6	6	(1,0)	C-9	Optimal	1050	1050	1	75.7296	0	0
C30x30-30-1_10_10_50-2_5-2.dat	2	6	6	(1,0)	C-9	Optimal	950	950	1	67.2946	0	0
C30x30-30-1_10_10_50-2_5-3.dat	2	5	5	(1,0)	C-9	Optimal	1046	1046	1	35.3734	0	0
C30x30-30-1_10_10_50-2_5-4.dat	2	6	6	(1,0)	C-9	Optimal	990	990	1	74.4106	0	0
C30x30-30-1_10_10_50-2_5-5.dat	2	6	6	(1,0)	C-9	Optimal	954	954	1	77.7434	0	0
C30x30-30-1_10_10_50-2_7-1.dat	2	8	8	(1,0)	C-9	Optimal	1130	1130	1	226.656	0	0
C30x30-30-1_10_10_50-2_7-2.dat	2	8	8	(1,0)	C-9	Optimal	1058	1058	1	210.436	0	0
C30x30-30-1_10_10_50-2_7-3.dat	2	8	8	(1,0)	C-9	Optimal	1273	1273	1	233.317	0	0
C30x30-30-1_10_10_50-2_7-4.dat	2	8	8	(1,0)	C-9	Optimal	1057	1057	1	241.796	0	0
C30x30-30-1_10_10_50-2_7-5.dat	2	8	8	(1,0)	C-9	Optimal	1130	1130	1	231.538	0	0
C30x30-5-1_10_10_20-2_5-1.dat	2	5	5	(1,0)	C-6	Optimal	170	170	1	6.79902	0	0
C30x30-5-1_10_10_20-2_5-2.dat	2	5	5	(1,0)	C-6	Optimal	186	186	1	8.97628	0	0
C30x30-5-1_10_10_20-2_5-3.dat	2	5	5	(1,0)	C-6	Optimal	167	167	1	10.0052	0	0
C30x30-5-1_10_10_20-2_5-4.dat	2	4	4	(1,0)	C-6	Optimal	177	177	1	3.01505	0	0
C30x30-5-1_10_10_20-2_5-5.dat	2	5	5	(1,0)	C-6	Optimal	196	196	1	7.28855	0	0
C30x30-5-1_10_10_20-2_7-1.dat	2	5	5	(1,0)	C-6	Optimal	152	152	1	4.68135	0	0
C30x30-5-1_10_10_20-2_7-2.dat	2	6	6	(1,0)	C-6	Optimal	240	240	1	13.4298	0	0
C30x30-5-1_10_10_20-2_7-3.dat	2	7	7	(1,0)	C-6	Optimal	273	273	1	42.0048	0	0
C30x30-5-1_10_10_20-2_7-4.dat	2	7	7	(1,0)	C-6	Optimal	228	228	1	33.1193	0	0
C30x30-5-1_10_10_20-2_7-5.dat	2	6	6	(1,0)	C-6	Optimal	200	200	1	12.3256	0	0
C30x30-5-1_10_10_50-2_5-1.dat	2	4	4	(1,0)	C-6	Optimal	179	179	1	2.17265	0	0
C30x30-5-1_10_10_50-2_5-2.dat	2	5	5	(1,0)	C-6	Optimal	240	240	1	4.86943	0	0
C30x30-5-1_10_10_50-2_5-3.dat	2	5	5	(1,0)	C-6	Optimal	234	234	1	8.19295	0	0
C30x30-5-1_10_10_50-2_5-4.dat	2	4	4	(1,0)	C-6	Optimal	237	237	1	2.32668	0	0
C30x30-5-1_10_10_50-2_5-5.dat	2	5	5	(1,0)	C-6	Optimal	174	174	1	6.85864	0	0
C30x30-5-1_10_10_50-2_7-1.dat	2	8	8	(1,0)	C-6	Optimal	304	304	1	37.0594	0	0
C30x30-5-1_10_10_50-2_7-2.dat	2	7	7	(1,0)	C-6	Optimal	276	276	1	28.7878	0	0
C30x30-5-1_10_10_50-2_7-3.dat	2	6	6	(1,0)	C-6	Optimal	228	228	1	14.0719	0	0
C30x30-5-1_10_10_50-2_7-4.dat	2	7	7	(1,0)	C-6	Optimal	283	283	1	21.7393	0	0
C30x30-5-1_10_10_50-2_7-5.dat	2	7	7	(1,0)	C-6	Optimal	201	201	1	17.7368	0	0
D10x10-10-1_10_10_20-1.dat	2	9	9	(1,0)	D-4	Optimal	379	379	1	486.291	0	0
D10x10-10-1_10_10_20-2.dat	2	9	9	(1,0)	D-4	Optimal	265	265	1	367.902	0	0
D10x10-10-1_10_10_20-3.dat	2	10	10	(1,0)	D-4	Optimal	299	299	1	1475.99	0	0
D10x10-10-1_10_10_20-4.dat	2	10	10	(1,0)	D-4	Optimal	323	323	1	1351.87	0	0
D10x10-10-1_10_10_20-5.dat	2	8	8	(1,0)	D-4	Optimal	281	281	1	372.456	0	0
D10x10-10-1_10_10_50-1.dat	2	10	10	(1,0)	D-4	Optimal	258	258	1	440.546	0	0
D10x10-10-1_10_10_50-2.dat	2	10	10	(1,0)	D-4	Optimal	479	479	1	561.528	0	0
D10x10-10-1_10_10_50-3.dat	2	7	7	(1,0)	D-4	Optimal	289	289	1	199.28	0	0
D10x10-10-1_10_10_50-4.dat	2	9	9	(1,0)	D-4	Optimal	371	371	1	708.396	0	0
D10x10-10-1_10_10_50-5.dat	2	9	9	(1,0)	D-4	Optimal	372	372	1	429.538	0	0
D10x10-5-1_10_10_20-1.dat	2	10	10	(1,0)	D-3	Optimal	188	188	1	181.9	0	0
D10x10-5-1_10_10_20-2.dat	2	10	10	(1,0)	D-3	Optimal	177	177	1	77.4709	0	0
D10x10-5-1_10_10_20-3.dat	2	9	9	(1,0)	D-3	Optimal	206	206	1	38.8474	0	0
D10x10-5-1_10_10_20-4.dat	2	9	9	(1,0)	D-3	Optimal	171	171	1	65.3458	0	0
D10x10-5-1_10_10_20-5.dat	2	9	9	(1,0)	D-3	Optimal	138	138	1	45.4865	0	0
D10x10-5-1_10_10_50-1.dat	2	8	8	(1,0)	D-3	Optimal	98	98	1	22.071	0	0
D10x10-5-1_10_10_50-2.dat	2	9	9	(1,0)	D-3	Optimal	235	235	1	55.3853	0	0
D10x10-5-1_10_10_50-3.dat	2	10	10	(1,0)	D-3	Optimal	421	421	1	63.7437	0	0
D10x10-5-1_10_10_50-4.dat	2	8	8	(1,0)	D-3	Optimal	275	275	1	30.9311	0	0
D10x10-5-1_10_10_50-5.dat	2	10	10	(1,0)	D-3	Optimal	164	164	1	88.69	0	0
D20x20-5-1_10_10_20-1.dat	2	19	19	(1,0)	D-5	Unknown	1e+75	341.407	0	7200	1	0
D20x20-5-1_10_10_20-2.dat	2	15	15	(1,0)	D-5	Optimal	307	307	1	6034.04	0	0
D20x20-5-1_10_10_20-3.dat	2	17	17	(1,0)	D-5	Feasible	314	268.155	0	7200	0.146003	0
D20x20-5-1_10_10_20-4.dat	2	14	14	(1,0)	D-5	Optimal	233	233	1	370.972	0	0
D20x20-5-1_10_10_20-5.dat	2	17	17	(1,0)	D-5	Unknown	1e+75	330.883	0	7200	1	0
D20x20-5-1_10_10_50-1.dat	2	15	15	(1,0)	D-5	Optimal	743	743	1	276.378	0	0
D20x20-5-1_10_10_50-2.dat	2	13	13	(1,0)	D-5	Optimal	461	461	1	481.499	0	0
D20x20-5-1_10_10_50-3.dat	2	15	15	(1,0)	D-5	Optimal	406	406	1	3012.63	0	0
D20x20-5-1_10_10_50-4.dat	2	15	15	(1,0)	D-5	Optimal	338	338	1	274.928	0	0
D20x20-5-1_10_10_50-5.dat	2	16	16	(1,0)	D-5	Optimal	457	457	1	670.524	0	0
D5x5-5-1_10_10_20-1.dat	2	5	5	(1,0)	D-1	Optimal	73	73	1	4.87531	0	0
D5x5-5-1_10_10_20-2.dat	2	4	4	(1,0)	D-1	Optimal	62	62	1	4.04985	0	0
D5x5-5-1_10_10_20-3.dat	2	5	5	(1,0)	D-1	Optimal	113	113	1	5.79297	0	0
D5x5-5-1_10_10_20-4.dat	2	5	5	(1,0)	D-1	Optimal	126	126	1	5.67235	0	0
D5x5-5-1_10_10_20-5.dat	2	5	5	(1,0)	D-1	Optimal	92	92	1	9.47634	0	0
D5x5-5-1_10_10_50-1.dat	2	5	5	(1,0)	D-1	Optimal	86	86	1	4.05681	0	0
D5x5-5-1_10_10_50-2.dat	2	5	5	(1,0)	D-1	Optimal	169	169	1	4.64739	0	0
D5x5-5-1_10_10_50-3.dat	2	5	5	(1,0)	D-1	Optimal	153	153	1	6.51285	0	0
D5x5-5-1_10_10_50-4.dat	2	5	5	(1,0)	D-1	Optimal	153	153	1	6.27222	0	0
D5x5-5-1_10_10_50-5.dat	2	4	4	(1,0)	D-1	Optimal	102	102	1	3.71428	0	0
D7x7-5-1_10_10_20-1.dat	2	7	7	(1,0)	D-2	Optimal	196	196	1	11.2386	0	0
D7x7-5-1_10_10_20-2.dat	2	6	6	(1,0)	D-2	Optimal	150	150	1	12.9287	0	0
D7x7-5-1_10_10_20-3.dat	2	5	5	(1,0)	D-2	Optimal	113	113	1	7.18056	0	0
D7x7-5-1_10_10_20-4.dat	2	6	6	(1,0)	D-2	Optimal	128	128	1	24.805	0	0
D7x7-5-1_10_10_20-5.dat	2	7	7	(1,0)	D-2	Optimal	108	108	1	28.5867	0	0
D7x7-5-1_10_10_50-1.dat	2	7	7	(1,0)	D-2	Optimal	180	180	1	32.272	0	0
D7x7-5-1_10_10_50-2.dat	2	5	5	(1,0)	D-2	Optimal	149	149	1	11.8362	0	0
D7x7-5-1_10_10_50-3.dat	2	6	6	(1,0)	D-2	Optimal	106	106	1	13.8993	0	0
D7x7-5-1_10_10_50-4.dat	2	7	7	(1,0)	D-2	Optimal	108	108	1	15.2669	0	0
D7x7-5-1_10_10_50-5.dat	2	6	6	(1,0)	D-2	Optimal	166	166	1	16.1608	0	0
E100-10-0.1-1.dat	2	8	8	(1,0)	E-10	Optimal	406	406	1	500.787	0	0
E100-10-0.1-2.dat	2	9	9	(1,0)	E-10	Optimal	420	420	1	892.759	0	0
E100-10-0.1-3.dat	2	10	10	(1,0)	E-10	Optimal	591	591	1	1685.4	0	0
E100-10-0.1-4.dat	2	7	7	(1,0)	E-10	Optimal	528	528	1	231.657	0	0
E100-10-0.1-5.dat	2	7	7	(1,0)	E-10	Optimal	432	432	1	260.536	0	0
E100-10-0.2-1.dat	2	6	6	(1,0)	E-12	Optimal	449	449	1	2420.07	0	0
E100-10-0.2-2.dat	2	6	6	(1,0)	E-12	Optimal	488	488	1	6057.51	0	0
E100-10-0.2-3.dat	2	4	4	(1,0)	E-12	Optimal	345	345	1	254.843	0	1
E100-10-0.2-4.dat	2	7	7	(1,0)	E-12	Unknown	1e+75	433.029	0	7200	1	0
E100-10-0.2-5.dat	2	6	6	(1,0)	E-12	Unknown	1e+75	420.3	0	7200	1	0
E100-5-0.1-1.dat	2	6	6	(1,0)	E-9	Optimal	253	253	1	32.5619	0	0
E100-5-0.1-2.dat	2	6	6	(1,0)	E-9	Optimal	273	273	1	18.5843	0	0
E100-5-0.1-3.dat	2	6	6	(1,0)	E-9	Optimal	201	201	1	29.6342	0	0
E100-5-0.1-4.dat	2	6	6	(1,0)	E-9	Infeasible	1e+75	1e+75	1	1.98832	0	0
E100-5-0.1-5.dat	2	7	7	(1,0)	E-9	Optimal	243	243	1	28.3871	0	1
E100-5-0.2-1.dat	2	6	6	(1,0)	E-11	Optimal	295	295	1	236.093	0	1
E100-5-0.2-2.dat	2	5	5	(1,0)	E-11	Optimal	233	233	1	85.3623	0	1
E100-5-0.2-3.dat	2	4	4	(1,0)	E-11	Optimal	320	320	1	16.4601	0	1
E100-5-0.2-4.dat	2	5	5	(1,0)	E-11	Optimal	230	230	1	108.921	0	1
E100-5-0.2-5.dat	2	5	5	(1,0)	E-11	Optimal	268	268	1	114.287	0	1
E50-10-0.1-1.dat	2	8	8	(1,0)	E-2	Infeasible	1e+75	1e+75	1	5.69343	0	0
E50-10-0.1-2.dat	2	9	9	(1,0)	E-2	Infeasible	1e+75	1e+75	1	3.81485	0	0
E50-10-0.1-3.dat	2	9	9	(1,0)	E-2	Infeasible	1e+75	1e+75	1	4.23203	0	0
E50-10-0.1-4.dat	2	12	12	(1,0)	E-2	Optimal	491	491	1	33.7901	0	0
E50-10-0.1-5.dat	2	10	10	(1,0)	E-2	Infeasible	1e+75	1e+75	1	5.15446	0	0
E50-10-0.2-1.dat	2	5	5	(1,0)	E-4	Optimal	355	355	1	204.105	0	1
E50-10-0.2-2.dat	2	7	7	(1,0)	E-4	Optimal	517	517	1	175.82	0	0
E50-10-0.2-3.dat	2	6	6	(1,0)	E-4	Optimal	339	339	1	188.345	0	0
E50-10-0.2-4.dat	2	6	6	(1,0)	E-4	Optimal	419	419	1	74.3511	0	0
E50-10-0.2-5.dat	2	5	5	(1,0)	E-4	Optimal	315	315	1	207.725	0	0
E50-5-0.1-1.dat	2	7	7	(1,0)	E-1	Optimal	264	264	1	6.3581	0	0
E50-5-0.1-2.dat	2	9	9	(1,0)	E-1	Infeasible	1e+75	1e+75	1	0.824561	0	0
E50-5-0.1-3.dat	2	8	8	(1,0)	E-1	Optimal	222	222	1	5.01602	0	0
E50-5-0.1-4.dat	2	10	10	(1,0)	E-1	Optimal	409	409	1	8.29297	0	0
E50-5-0.1-5.dat	2	9	9	(1,0)	E-1	Infeasible	1e+75	1e+75	1	0.749191	0	0
E50-5-0.2-1.dat	2	5	5	(1,0)	E-3	Optimal	363	363	1	24.2453	0	0
E50-5-0.2-2.dat	2	7	7	(1,0)	E-3	Infeasible	1e+75	1e+75	1	1.58997	0	0
E50-5-0.2-3.dat	2	5	5	(1,0)	E-3	Optimal	289	289	1	5.67532	0	0
E50-5-0.2-4.dat	2	5	5	(1,0)	E-3	Optimal	310	310	1	12.1684	0	0
E50-5-0.2-5.dat	2	6	6	(1,0)	E-3	Optimal	248	248	1	13.351	0	1
E75-10-0.1-1.dat	2	9	9	(1,0)	E-6	Optimal	537	537	1	63.8238	0	0
E75-10-0.1-2.dat	2	10	10	(1,0)	E-6	Optimal	459	459	1	226.558	0	0
E75-10-0.1-3.dat	2	7	7	(1,0)	E-6	Optimal	426	426	1	132.205	0	0
E75-10-0.1-4.dat	2	13	13	(1,0)	E-6	Optimal	647	647	1	182.525	0	0
E75-10-0.1-5.dat	2	9	9	(1,0)	E-6	Optimal	501	501	1	332.237	0	0
E75-10-0.2-1.dat	2	5	5	(1,0)	E-8	Optimal	390	390	1	661.49	0	1
E75-10-0.2-2.dat	2	6	6	(1,0)	E-8	Optimal	377	377	1	423.489	0	0
E75-10-0.2-3.dat	2	6	6	(1,0)	E-8	Optimal	508	508	1	1167.29	0	0
E75-10-0.2-4.dat	2	5	5	(1,0)	E-8	Optimal	441	441	1	724.044	0	0
E75-10-0.2-5.dat	2	6	6	(1,0)	E-8	Optimal	379	379	1	238.651	0	1
E75-5-0.1-1.dat	2	7	7	(1,0)	E-5	Optimal	258	258	1	25.6122	0	0
E75-5-0.1-2.dat	2	7	7	(1,0)	E-5	Infeasible	1e+75	1e+75	1	1.46744	0	0
E75-5-0.1-3.dat	2	6	6	(1,0)	E-5	Optimal	274	274	1	18.3308	0	0
E75-5-0.1-4.dat	2	7	7	(1,0)	E-5	Optimal	278	278	1	21.2629	0	0
E75-5-0.1-5.dat	2	6	6	(1,0)	E-5	Optimal	266	266	1	17.4314	0	0
E75-5-0.2-1.dat	2	5	5	(1,0)	E-7	Optimal	231	231	1	67.5812	0	1
E75-5-0.2-2.dat	2	5	5	(1,0)	E-7	Optimal	273	273	1	33.3711	0	1
E75-5-0.2-3.dat	2	4	4	(1,0)	E-7	Optimal	226	226	1	42.7654	0	1
E75-5-0.2-4.dat	2	7	7	(1,0)	E-7	Optimal	316	316	1	105.545	0	0
E75-5-0.2-5.dat	2	6	6	(1,0)	E-7	Optimal	239	239	1	31.91	0	0
RE100-10-0.1-1.dat	2	5	5	(1,0)	R-10	Optimal	951	951	1	5746.31	0	0
RE100-10-0.1-2.dat	2	5	5	(1,0)	R-10	Optimal	920	920	1	1156.58	0	0
RE100-10-0.1-3.dat	2	5	5	(1,0)	R-10	Optimal	1229	1229	1	304.301	0	0
RE100-10-0.1-4.dat	2	5	5	(1,0)	R-10	Optimal	1053	1053	1	1050.96	0	0
RE100-10-0.1-5.dat	2	5	5	(1,0)	R-10	Optimal	1014	1014	1	374.878	0	0
RE100-10-0.2-1.dat	2	4	4	(1,0)	R-12	Feasible	1555	1209.25	0	7200	0.222349	0
RE100-10-0.2-2.dat	2	4	4	(1,0)	R-12	Optimal	1001	1001	1	3233.61	0	0
RE100-10-0.2-3.dat	2	4	4	(1,0)	R-12	Optimal	1000	1000	1	542.9	0	1
RE100-10-0.2-4.dat	2	4	4	(1,0)	R-12	Optimal	985	985	1	6504.83	0	0
RE100-10-0.2-5.dat	2	4	4	(1,0)	R-12	Optimal	827	827	1	683.675	0	0
RE100-5-0.1-1.dat	2	4	4	(1,0)	R-9	Optimal	554	554	1	19.6799	0	0
RE100-5-0.1-2.dat	2	4	4	(1,0)	R-9	Optimal	617	617	1	8.90242	0	0
RE100-5-0.1-3.dat	2	4	4	(1,0)	R-9	Optimal	559	559	1	24.531	0	1
RE100-5-0.1-4.dat	2	6	6	(1,0)	R-9	Optimal	705	705	1	25.1257	0	0
RE100-5-0.1-5.dat	2	5	5	(1,0)	R-9	Optimal	679	679	1	27.2632	0	0
RE100-5-0.2-1.dat	2	3	3	(1,0)	R-11	Optimal	798	798	1	3.11108	0	1
RE100-5-0.2-2.dat	2	3	3	(1,0)	R-11	Optimal	537	537	1	4.38422	0	1
RE100-5-0.2-3.dat	2	3	3	(1,0)	R-11	Optimal	501	501	1	0.622008	0	1
RE100-5-0.2-4.dat	2	3	3	(1,0)	R-11	Optimal	389	389	1	1.50789	0	1
RE100-5-0.2-5.dat	2	3	3	(1,0)	R-11	Optimal	643	643	1	1.12208	0	1
RE50-10-0.1-1.dat	2	5	5	(1,0)	R-2	Optimal	1377	1377	1	23.1588	0	0
RE50-10-0.1-2.dat	2	6	6	(1,0)	R-2	Optimal	1160	1160	1	46.4283	0	0
RE50-10-0.1-3.dat	2	7	7	(1,0)	R-2	Optimal	1243	1243	1	120.724	0	0
RE50-10-0.1-4.dat	2	7	7	(1,0)	R-2	Optimal	794	794	1	77.2842	0	0
RE50-10-0.1-5.dat	2	6	6	(1,0)	R-2	Optimal	1485	1485	1	79.3965	0	0
RE50-10-0.2-1.dat	2	4	4	(1,0)	R-4	Optimal	1160	1160	1	117.01	0	0
RE50-10-0.2-2.dat	2	4	4	(1,0)	R-4	Optimal	1374	1374	1	288.464	0	0
RE50-10-0.2-3.dat	2	4	4	(1,0)	R-4	Optimal	1035	1035	1	282.195	0	1
RE50-10-0.2-4.dat	2	4	4	(1,0)	R-4	Optimal	1110	1110	1	196.579	0	1
RE50-10-0.2-5.dat	2	4	4	(1,0)	R-4	Optimal	1044	1044	1	164.209	0	1
RE50-5-0.1-1.dat	2	4	4	(1,0)	R-1	Infeasible	1e+75	1e+75	1	0.494602	0	0
RE50-5-0.1-2.dat	2	6	6	(1,0)	R-1	Optimal	655	655	1	16.9576	0	0
RE50-5-0.1-3.dat	2	6	6	(1,0)	R-1	Optimal	755	755	1	16.1975	0	0
RE50-5-0.1-4.dat	2	5	5	(1,0)	R-1	Optimal	785	785	1	6.02163	0	0
RE50-5-0.1-5.dat	2	7	7	(1,0)	R-1	Optimal	789	789	1	15.9201	0	0
RE50-5-0.2-1.dat	2	3	3	(1,0)	R-3	Optimal	535	535	1	0.535646	0	0
RE50-5-0.2-2.dat	2	4	4	(1,0)	R-3	Optimal	593	593	1	8.9707	0	1
RE50-5-0.2-3.dat	2	4	4	(1,0)	R-3	Optimal	633	633	1	18.3099	0	0
RE50-5-0.2-4.dat	2	4	4	(1,0)	R-3	Optimal	750	750	1	13.3003	0	0
RE50-5-0.2-5.dat	2	4	4	(1,0)	R-3	Optimal	757	757	1	10.8773	0	0
RE75-10-0.1-1.dat	2	5	5	(1,0)	R-6	Optimal	1078	1078	1	443.834	0	0
RE75-10-0.1-2.dat	2	5	5	(1,0)	R-6	Optimal	1080	1080	1	239.774	0	0
RE75-10-0.1-3.dat	2	5	5	(1,0)	R-6	Optimal	1147	1147	1	135.048	0	0
RE75-10-0.1-4.dat	2	5	5	(1,0)	R-6	Optimal	1176	1176	1	106.344	0	0
RE75-10-0.1-5.dat	2	6	6	(1,0)	R-6	Optimal	1313	1313	1	1070.49	0	0
RE75-10-0.2-1.dat	2	4	4	(1,0)	R-8	Optimal	1197	1197	1	460.86	0	0
RE75-10-0.2-2.dat	2	4	4	(1,0)	R-8	Optimal	1202	1202	1	772.185	0	0
RE75-10-0.2-3.dat	2	4	4	(1,0)	R-8	Optimal	1222	1222	1	1135.08	0	0
RE75-10-0.2-4.dat	2	4	4	(1,0)	R-8	Optimal	1208	1208	1	1405.55	0	0
RE75-10-0.2-5.dat	2	3	3	(1,0)	R-8	Optimal	1466	1466	1	75.6945	0	1
RE75-5-0.1-1.dat	2	5	5	(1,0)	R-5	Optimal	597	597	1	33.1781	0	0
RE75-5-0.1-2.dat	2	5	5	(1,0)	R-5	Optimal	702	702	1	12.9717	0	0
RE75-5-0.1-3.dat	2	5	5	(1,0)	R-5	Optimal	643	643	1	21.0713	0	0
RE75-5-0.1-4.dat	2	5	5	(1,0)	R-5	Optimal	407	407	1	19.7944	0	1
RE75-5-0.1-5.dat	2	4	4	(1,0)	R-5	Optimal	1036	1036	1	5.74547	0	0
RE75-5-0.2-1.dat	2	3	3	(1,0)	R-7	Optimal	697	697	1	1.28536	0	1
RE75-5-0.2-2.dat	2	4	4	(1,0)	R-7	Optimal	534	534	1	25.5407	0	0
RE75-5-0.2-3.dat	2	4	4	(1,0)	R-7	Optimal	734	734	1	49.6999	0	1
RE75-5-0.2-4.dat	2	4	4	(1,0)	R-7	Optimal	529	529	1	38.2921	0	1
RE75-5-0.2-5.dat	2	3	3	(1,0)	R-7	Optimal	452	452	1	0.813702	0	1
C10x10-10-1_10_10_20-2_5-1.dat	2	5	6	(1,1)	C-2	Optimal	283	283	1	23.8685	0	0
C10x10-10-1_10_10_20-2_5-2.dat	2	6	7	(1,1)	C-2	Optimal	287	287	1	40.1829	0	0
C10x10-10-1_10_10_20-2_5-3.dat	2	6	7	(1,1)	C-2	Optimal	278	278	1	64.2343	0	0
C10x10-10-1_10_10_20-2_5-4.dat	2	5	6	(1,1)	C-2	Optimal	196	196	1	14.9952	0	0
C10x10-10-1_10_10_20-2_5-5.dat	2	5	6	(1,1)	C-2	Optimal	204	204	1	11.885	0	0
C10x10-10-1_10_10_20-2_7-1.dat	2	8	9	(1,1)	C-2	Optimal	308	308	1	182.816	0	0
C10x10-10-1_10_10_20-2_7-2.dat	2	7	8	(1,1)	C-2	Optimal	272	272	1	118.382	0	0
C10x10-10-1_10_10_20-2_7-3.dat	2	7	8	(1,1)	C-2	Optimal	284	284	1	236.848	0	0
C10x10-10-1_10_10_20-2_7-4.dat	2	7	8	(1,1)	C-2	Optimal	310	310	1	126.638	0	0
C10x10-10-1_10_10_20-2_7-5.dat	2	7	8	(1,1)	C-2	Optimal	280	280	1	114.012	0	0
C10x10-10-1_10_10_50-2_5-1.dat	2	6	7	(1,1)	C-2	Optimal	262	262	1	20.9077	0	0
C10x10-10-1_10_10_50-2_5-2.dat	2	5	6	(1,1)	C-2	Optimal	282	282	1	16.5836	0	0
C10x10-10-1_10_10_50-2_5-3.dat	2	6	7	(1,1)	C-2	Optimal	268	268	1	25.7303	0	0
C10x10-10-1_10_10_50-2_5-4.dat	2	5	6	(1,1)	C-2	Optimal	208	208	1	19.9944	0	0
C10x10-10-1_10_10_50-2_5-5.dat	2	5	6	(1,1)	C-2	Optimal	335	335	1	18.6477	0	0
C10x10-10-1_10_10_50-2_7-1.dat	2	8	9	(1,1)	C-2	Optimal	278	278	1	55.7121	0	0
C10x10-10-1_10_10_50-2_7-2.dat	2	7	8	(1,1)	C-2	Optimal	244	244	1	31.2895	0	0
C10x10-10-1_10_10_50-2_7-3.dat	2	8	9	(1,1)	C-2	Optimal	244	244	1	55.2291	0	0
C10x10-10-1_10_10_50-2_7-4.dat	2	8	9	(1,1)	C-2	Optimal	263	263	1	161.813	0	0
C10x10-10-1_10_10_50-2_7-5.dat	2	7	8	(1,1)	C-2	Optimal	291	291	1	56.7855	0	0
C10x10-5-1_10_10_20-2_5-1.dat	2	4	5	(1,1)	C-1	Optimal	154	154	1	5.80744	0	0
C10x10-5-1_10_10_20-2_5-2.dat	2	5	6	(1,1)	C-1	Optimal	206	206	1	16.5311	0	0
C10x10-5-1_10_10_20-2_5-3.dat	2	5	6	(1,1)	C-1	Optimal	183	183	1	8.59872	0	0
C10x10-5-1_10_10_20-2_5-4.dat	2	5	6	(1,1)	C-1	Optimal	152	152	1	11.7662	0	0
C10x10-5-1_10_10_20-2_5-5.dat	2	5	6	(1,1)	C-1	Optimal	130	130	1	7.13477	0	0
C10x10-5-1_10_10_20-2_7-1.dat	2	8	9	(1,1)	C-1	Optimal	157	157	1	42.2478	0	0
C10x10-5-1_10_10_20-2_7-2.dat	2	7	8	(1,1)	C-1	Optimal	151	151	1	42.1337	0	0
C10x10-5-1_10_10_20-2_7-3.dat	2	6	7	(1,1)	C-1	Optimal	175	175	1	29.421	0	1
C10x10-5-1_10_10_20-2_7-4.dat	2	6	7	(1,1)	C-1	Optimal	178	178	1	21.4795	0	0
C10x10-5-1_10_10_20-2_7-5.dat	2	7	8	(1,1)	C-1	Optimal	161	161	1	12.7977	0	0
C10x10-5-1_10_10_50-2_5-1.dat	2	6	7	(1,1)	C-1	Optimal	131	131	1	9.8877	0	0
C10x10-5-1_10_10_50-2_5-2.dat	2	4	5	(1,1)	C-1	Optimal	175	175	1	4.9248	0	0
C10x10-5-1_10_10_50-2_5-3.dat	2	4	5	(1,1)	C-1	Optimal	116	116	1	4.63723	0	0
C10x10-5-1_10_10_50-2_5-4.dat	2	6	7	(1,1)	C-1	Optimal	180	180	1	17.6279	0	0
C10x10-5-1_10_10_50-2_5-5.dat	2	5	6	(1,1)	C-1	Optimal	172	172	1	13.2685	0	0
C10x10-5-1_10_10_50-2_7-1.dat	2	6	7	(1,1)	C-1	Optimal	167	167	1	13.3781	0	0
C10x10-5-1_10_10_50-2_7-2.dat	2	7	8	(1,1)	C-1	Optimal	151	151	1	25.4885	0	0
C10x10-5-1_10_10_50-2_7-3.dat	2	7	8	(1,1)	C-1	Optimal	228	228	1	25.575	0	0
C10x10-5-1_10_10_50-2_7-4.dat	2	6	7	(1,1)	C-1	Optimal	204	204	1	18.5937	0	0
C10x10-5-1_10_10_50-2_7-5.dat	2	5	6	(1,1)	C-1	Optimal	191	191	1	7.75036	0	0
C20x20-10-1_10_10_20-2_5-1.dat	2	6	7	(1,1)	C-4	Optimal	334	334	1	33.7413	0	0
C20x20-10-1_10_10_20-2_5-2.dat	2	5	6	(1,1)	C-4	Optimal	306	306	1	18.2495	0	0
C20x20-10-1_10_10_20-2_5-3.dat	2	6	7	(1,1)	C-4	Optimal	383	383	1	48.0211	0	0
C20x20-10-1_10_10_20-2_5-4.dat	2	6	7	(1,1)	C-4	Optimal	392	392	1	42.7605	0	0
C20x20-10-1_10_10_20-2_5-5.dat	2	5	6	(1,1)	C-4	Optimal	325	325	1	17.8193	0	0
C20x20-10-1_10_10_20-2_7-1.dat	2	8	9	(1,1)	C-4	Optimal	409	409	1	134.986	0	0
C20x20-10-1_10_10_20-2_7-2.dat	2	6	7	(1,1)	C-4	Optimal	477	477	1	46.5508	0	0
C20x20-10-1_10_10_20-2_7-3.dat	2	6	7	(1,1)	C-4	Optimal	386	386	1	38.4833	0	0
C20x20-10-1_10_10_20-2_7-4.dat	2	7	8	(1,1)	C-4	Optimal	385	385	1	53.1454	0	0
C20x20-10-1_10_10_20-2_7-5.dat	2	7	8	(1,1)	C-4	Optimal	305	305	1	59.3255	0	0
C20x20-10-1_10_10_50-2_5-1.dat	2	6	7	(1,1)	C-4	Optimal	309	309	1	26.9239	0	0
C20x20-10-1_10_10_50-2_5-2.dat	2	5	6	(1,1)	C-4	Optimal	312	312	1	19.7451	0	0
C20x20-10-1_10_10_50-2_5-3.dat	2	6	7	(1,1)	C-4	Optimal	393	393	1	38.036	0	0
C20x20-10-1_10_10_50-2_5-4.dat	2	6	7	(1,1)	C-4	Optimal	351	351	1	30.4486	0	0
C20x20-10-1_10_10_50-2_5-5.dat	2	5	6	(1,1)	C-4	Optimal	370	370	1	20.3141	0	0
C20x20-10-1_10_10_50-2_7-1.dat	2	6	7	(1,1)	C-4	Optimal	411	411	1	31.339	0	0
C20x20-10-1_10_10_50-2_7-2.dat	2	6	7	(1,1)	C-4	Optimal	446	446	1	43.7584	0	0
C20x20-10-1_10_10_50-2_7-3.dat	2	7	8	(1,1)	C-4	Optimal	436	436	1	56.7847	0	0
C20x20-10-1_10_10_50-2_7-4.dat	2	6	7	(1,1)	C-4	Optimal	399	399	1	37.8769	0	0
C20x20-10-1_10_10_50-2_7-5.dat	2	6	7	(1,1)	C-4	Optimal	311	311	1	34.6526	0	1
C20x20-20-1_10_10_20-2_5-1.dat	2	6	7	(1,1)	C-5	Optimal	642	642	1	70.8793	0	0
C20x20-20-1_10_10_20-2_5-2.dat	2	6	7	(1,1)	C-5	Optimal	646	646	1	74.2091	0	0
C20x20-20-1_10_10_20-2_5-3.dat	2	6	7	(1,1)	C-5	Optimal	619	619	1	77.9471	0	0
C20x20-20-1_10_10_20-2_5-4.dat	2	6	7	(1,1)	C-5	Optimal	662	662	1	156.941	0	0
C20x20-20-1_10_10_20-2_5-5.dat	2	6	7	(1,1)	C-5	Optimal	696	696	1	52.9304	0	0
C20x20-20-1_10_10_20-2_7-1.dat	2	8	9	(1,1)	C-5	Feasible	759	742.636	0	7200	0.0215604	0
C20x20-20-1_10_10_20-2_7-2.dat	2	7	8	(1,1)	C-5	Optimal	693	693	1	140.992	0	0
C20x20-20-1_10_10_20-2_7-3.dat	2	8	9	(1,1)	C-5	Feasible	816	769.736	0	7200	0.0566959	0
C20x20-20-1_10_10_20-2_7-4.dat	2	8	9	(1,1)	C-5	Optimal	631	631	1	242.014	0	0
C20x20-20-1_10_10_20-2_7-5.dat	2	7	8	(1,1)	C-5	Optimal	748	748	1	161.078	0	0
C20x20-20-1_10_10_50-2_5-1.dat	2	6	7	(1,1)	C-5	Optimal	580	580	1	55.2146	0	0
C20x20-20-1_10_10_50-2_5-2.dat	2	6	7	(1,1)	C-5	Optimal	647	647	1	75.0131	0	0
C20x20-20-1_10_10_50-2_5-3.dat	2	6	7	(1,1)	C-5	Optimal	575	575	1	61.8159	0	0
C20x20-20-1_10_10_50-2_5-4.dat	2	5	6	(1,1)	C-5	Optimal	660	660	1	40.859	0	0
C20x20-20-1_10_10_50-2_5-5.dat	2	6	7	(1,1)	C-5	Optimal	605	605	1	65.1141	0	0
C20x20-20-1_10_10_50-2_7-1.dat	2	7	8	(1,1)	C-5	Optimal	697	697	1	111.506	0	0
C20x20-20-1_10_10_50-2_7-2.dat	2	8	9	(1,1)	C-5	Optimal	727	727	1	159.807	0	0
C20x20-20-1_10_10_50-2_7-3.dat	2	8	9	(1,1)	C-5	Optimal	745	745	1	236.318	0	0
C20x20-20-1_10_10_50-2_7-4.dat	2	7	8	(1,1)	C-5	Optimal	712	712	1	106.817	0	0
C20x20-20-1_10_10_50-2_7-5.dat	2	8	9	(1,1)	C-5	Optimal	653	653	1	115.935	0	0
C20x20-5-1_10_10_20-2_5-1.dat	2	5	6	(1,1)	C-3	Optimal	166	166	1	10.655	0	0
C20x20-5-1_10_10_20-2_5-2.dat	2	4	5	(1,1)	C-3	Optimal	171	171	1	5.71928	0	1
C20x20-5-1_10_10_20-2_5-3.dat	2	5	6	(1,1)	C-3	Optimal	191	191	1	13.5645	0	0
C20x20-5-1_10_10_20-2_5-4.dat	2	5	6	(1,1)	C-3	Optimal	207	207	1	13.7985	0	0
C20x20-5-1_10_10_20-2_5-5.dat	2	5	6	(1,1)	C-3	Optimal	185	185	1	13.0441	0	0
C20x20-5-1_10_10_20-2_7-1.dat	2	8	9	(1,1)	C-3	Optimal	197	197	1	34.697	0	1
C20x20-5-1_10_10_20-2_7-2.dat	2	7	8	(1,1)	C-3	Optimal	243	243	1	27.6858	0	0
C20x20-5-1_10_10_20-2_7-3.dat	2	7	8	(1,1)	C-3	Optimal	209	209	1	21.9578	0	0
C20x20-5-1_10_10_20-2_7-4.dat	2	8	9	(1,1)	C-3	Optimal	207	207	1	31.5048	0	0
C20x20-5-1_10_10_20-2_7-5.dat	2	7	8	(1,1)	C-3	Optimal	189	189	1	30.8419	0	1
C20x20-5-1_10_10_50-2_5-1.dat	2	4	5	(1,1)	C-3	Optimal	162	162	1	6.57222	0	0
C20x20-5-1_10_10_50-2_5-2.dat	2	5	6	(1,1)	C-3	Optimal	213	213	1	15.3642	0	0
C20x20-5-1_10_10_50-2_5-3.dat	2	6	7	(1,1)	C-3	Optimal	213	213	1	23.9428	0	0
C20x20-5-1_10_10_50-2_5-4.dat	2	4	5	(1,1)	C-3	Optimal	159	159	1	4.79993	0	0
C20x20-5-1_10_10_50-2_5-5.dat	2	5	6	(1,1)	C-3	Optimal	188	188	1	8.26652	0	0
C20x20-5-1_10_10_50-2_7-1.dat	2	6	7	(1,1)	C-3	Optimal	240	240	1	23.9895	0	0
C20x20-5-1_10_10_50-2_7-2.dat	2	4	5	(1,1)	C-3	Optimal	162	162	1	3.70925	0	0
C20x20-5-1_10_10_50-2_7-3.dat	2	8	9	(1,1)	C-3	Optimal	293	293	1	31.3162	0	0
C20x20-5-1_10_10_50-2_7-4.dat	2	6	7	(1,1)	C-3	Optimal	220	220	1	18.2316	0	0
C20x20-5-1_10_10_50-2_7-5.dat	2	5	6	(1,1)	C-3	Optimal	200	200	1	10.9499	0	0
C30x30-10-1_10_10_20-2_5-1.dat	2	6	7	(1,1)	C-7	Optimal	389	389	1	38.1953	0	0
C30x30-10-1_10_10_20-2_5-2.dat	2	6	7	(1,1)	C-7	Optimal	389	389	1	51.338	0	0
C30x30-10-1_10_10_20-2_5-3.dat	2	6	7	(1,1)	C-7	Optimal	365	365	1	35.0648	0	0
C30x30-10-1_10_10_20-2_5-4.dat	2	6	7	(1,1)	C-7	Optimal	406	406	1	38.7203	0	0
C30x30-10-1_10_10_20-2_5-5.dat	2	5	6	(1,1)	C-7	Optimal	397	397	1	24.8392	0	0
C30x30-10-1_10_10_20-2_7-1.dat	2	6	7	(1,1)	C-7	Optimal	488	488	1	39.3333	0	0
C30x30-10-1_10_10_20-2_7-2.dat	2	6	7	(1,1)	C-7	Optimal	425	425	1	53.5208	0	0
C30x30-10-1_10_10_20-2_7-3.dat	2	8	9	(1,1)	C-7	Optimal	502	502	1	90.5226	0	0
C30x30-10-1_10_10_20-2_7-4.dat	2	8	9	(1,1)	C-7	Optimal	423	423	1	93.0138	0	0
C30x30-10-1_10_10_20-2_7-5.dat	2	7	8	(1,1)	C-7	Optimal	512	512	1	39.3998	0	0
C30x30-10-1_10_10_50-2_5-1.dat	2	5	6	(1,1)	C-7	Optimal	295	295	1	21.6469	0	0
C30x30-10-1_10_10_50-2_5-2.dat	2	5	6	(1,1)	C-7	Optimal	376	376	1	21.8333	0	0
C30x30-10-1_10_10_50-2_5-3.dat	2	6	7	(1,1)	C-7	Optimal	400	400	1	46.0839	0	0
C30x30-10-1_10_10_50-2_5-4.dat	2	6	7	(1,1)	C-7	Optimal	346	346	1	40.4458	0	0
C30x30-10-1_10_10_50-2_5-5.dat	2	5	6	(1,1)	C-7	Optimal	383	383	1	26.1652	0	0
C30x30-10-1_10_10_50-2_7-1.dat	2	8	9	(1,1)	C-7	Optimal	422	422	1	77.7302	0	0
C30x30-10-1_10_10_50-2_7-2.dat	2	7	8	(1,1)	C-7	Optimal	490	490	1	44.7687	0	0
C30x30-10-1_10_10_50-2_7-3.dat	2	8	9	(1,1)	C-7	Optimal	474	474	1	80.6956	0	0
C30x30-10-1_10_10_50-2_7-4.dat	2	7	8	(1,1)	C-7	Optimal	533	533	1	58.852	0	0
C30x30-10-1_10_10_50-2_7-5.dat	2	7	8	(1,1)	C-7	Optimal	476	476	1	65.665	0	0
C30x30-20-1_10_10_20-2_5-1.dat	2	6	7	(1,1)	C-8	Optimal	712	712	1	80.0814	0	0
C30x30-20-1_10_10_20-2_5-2.dat	2	6	7	(1,1)	C-8	Optimal	584	584	1	46.1404	0	0
C30x30-20-1_10_10_20-2_5-3.dat	2	5	6	(1,1)	C-8	Optimal	698	698	1	35.6823	0	0
C30x30-20-1_10_10_20-2_5-4.dat	2	5	6	(1,1)	C-8	Optimal	609	609	1	39.3973	0	0
C30x30-20-1_10_10_20-2_5-5.dat	2	5	6	(1,1)	C-8	Optimal	600	600	1	46.4441	0	0
C30x30-20-1_10_10_20-2_7-1.dat	2	8	9	(1,1)	C-8	Optimal	820	820	1	177.496	0	0
C30x30-20-1_10_10_20-2_7-2.dat	2	7	8	(1,1)	C-8	Optimal	733	733	1	136.202	0	0
C30x30-20-1_10_10_20-2_7-3.dat	2	8	9	(1,1)	C-8	Optimal	828	828	1	122.691	0	0
C30x30-20-1_10_10_20-2_7-4.dat	2	8	9	(1,1)	C-8	Optimal	863	863	1	384.12	0	0
C30x30-20-1_10_10_20-2_7-5.dat	2	7	8	(1,1)	C-8	Optimal	911	911	1	194.399	0	0
C30x30-20-1_10_10_50-2_5-1.dat	2	6	7	(1,1)	C-8	Optimal	629	629	1	56.4982	0	0
C30x30-20-1_10_10_50-2_5-2.dat	2	6	7	(1,1)	C-8	Optimal	706	706	1	53.0676	0	0
C30x30-20-1_10_10_50-2_5-3.dat	2	5	6	(1,1)	C-8	Optimal	703	703	1	38.7297	0	0
C30x30-20-1_10_10_50-2_5-4.dat	2	6	7	(1,1)	C-8	Optimal	631	631	1	61.3301	0	0
C30x30-20-1_10_10_50-2_5-5.dat	2	6	7	(1,1)	C-8	Optimal	746	746	1	85.5405	0	0
C30x30-20-1_10_10_50-2_7-1.dat	2	7	8	(1,1)	C-8	Optimal	834	834	1	118.549	0	0
C30x30-20-1_10_10_50-2_7-2.dat	2	7	8	(1,1)	C-8	Optimal	763	763	1	112.458	0	0
C30x30-20-1_10_10_50-2_7-3.dat	2	8	9	(1,1)	C-8	Optimal	871	871	1	151.311	0	0
C30x30-20-1_10_10_50-2_7-4.dat	2	8	9	(1,1)	C-8	Optimal	869	869	1	169.178	0	0
C30x30-20-1_10_10_50-2_7-5.dat	2	8	9	(1,1)	C-8	Optimal	806	806	1	202.376	0	0
C30x30-30-1_10_10_20-2_5-1.dat	2	6	7	(1,1)	C-9	Optimal	1082	1082	1	107.638	0	0
C30x30-30-1_10_10_20-2_5-2.dat	2	6	7	(1,1)	C-9	Optimal	951	951	1	154.198	0	0
C30x30-30-1_10_10_20-2_5-3.dat	2	6	7	(1,1)	C-9	Optimal	895	895	1	117.602	0	0
C30x30-30-1_10_10_20-2_5-4.dat	2	6	7	(1,1)	C-9	Optimal	942	942	1	130.484	0	0
C30x30-30-1_10_10_20-2_5-5.dat	2	6	7	(1,1)	C-9	Optimal	944	944	1	143.427	0	0
C30x30-30-1_10_10_20-2_7-1.dat	2	8	9	(1,1)	C-9	Optimal	1059	1059	1	922.021	0	0
C30x30-30-1_10_10_20-2_7-2.dat	2	8	9	(1,1)	C-9	Optimal	1153	1153	1	1061.14	0	0
C30x30-30-1_10_10_20-2_7-3.dat	2	8	9	(1,1)	C-9	Feasible	1243	1230.35	0	7200	0.0101742	0
C30x30-30-1_10_10_20-2_7-4.dat	2	8	9	(1,1)	C-9	Feasible	1267	1257.63	0	7200	0.00739778	0
C30x30-30-1_10_10_20-2_7-5.dat	2	7	8	(1,1)	C-9	Optimal	1140	1140	1	251.047	0	0
C30x30-30-1_10_10_50-2_5-1.dat	2	6	7	(1,1)	C-9	Optimal	1000	1000	1	110.266	0	0
C30x30-30-1_10_10_50-2_5-2.dat	2	6	7	(1,1)	C-9	Optimal	933	933	1	103.694	0	0
C30x30-30-1_10_10_50-2_5-3.dat	2	5	6	(1,1)	C-9	Optimal	993	993	1	98.7988	0	0
C30x30-30-1_10_10_50-2_5-4.dat	2	6	7	(1,1)	C-9	Optimal	930	930	1	101.498	0	0
C30x30-30-1_10_10_50-2_5-5.dat	2	6	7	(1,1)	C-9	Optimal	905	905	1	115.11	0	0
C30x30-30-1_10_10_50-2_7-1.dat	2	8	9	(1,1)	C-9	Optimal	1094	1094	1	363.471	0	0
C30x30-30-1_10_10_50-2_7-2.dat	2	8	9	(1,1)	C-9	Optimal	997	997	1	256.022	0	0
C30x30-30-1_10_10_50-2_7-3.dat	2	8	9	(1,1)	C-9	Optimal	1200	1200	1	318.007	0	0
C30x30-30-1_10_10_50-2_7-4.dat	2	8	9	(1,1)	C-9	Optimal	1017	1017	1	407.832	0	0
C30x30-30-1_10_10_50-2_7-5.dat	2	8	9	(1,1)	C-9	Optimal	1079	1079	1	320.731	0	0
C30x30-5-1_10_10_20-2_5-1.dat	2	5	6	(1,1)	C-6	Optimal	161	161	1	11.3571	0	0
C30x30-5-1_10_10_20-2_5-2.dat	2	5	6	(1,1)	C-6	Optimal	182	182	1	17.0241	0	1
C30x30-5-1_10_10_20-2_5-3.dat	2	5	6	(1,1)	C-6	Optimal	164	164	1	14.3164	0	0
C30x30-5-1_10_10_20-2_5-4.dat	2	4	5	(1,1)	C-6	Optimal	171	171	1	6.45689	0	1
C30x30-5-1_10_10_20-2_5-5.dat	2	5	6	(1,1)	C-6	Optimal	192	192	1	21.6745	0	0
C30x30-5-1_10_10_20-2_7-1.dat	2	5	6	(1,1)	C-6	Optimal	152	152	1	12.1374	0	1
C30x30-5-1_10_10_20-2_7-2.dat	2	6	7	(1,1)	C-6	Optimal	229	229	1	16.7927	0	0
C30x30-5-1_10_10_20-2_7-3.dat	2	7	8	(1,1)	C-6	Optimal	254	254	1	51.0647	0	0
C30x30-5-1_10_10_20-2_7-4.dat	2	7	8	(1,1)	C-6	Optimal	220	220	1	36.6989	0	0
C30x30-5-1_10_10_20-2_7-5.dat	2	6	7	(1,1)	C-6	Optimal	198	198	1	27.2003	0	1
C30x30-5-1_10_10_50-2_5-1.dat	2	4	5	(1,1)	C-6	Optimal	159	159	1	5.45834	0	0
C30x30-5-1_10_10_50-2_5-2.dat	2	5	6	(1,1)	C-6	Optimal	221	221	1	13.8008	0	0
C30x30-5-1_10_10_50-2_5-3.dat	2	5	6	(1,1)	C-6	Optimal	217	217	1	16.0281	0	1
C30x30-5-1_10_10_50-2_5-4.dat	2	4	5	(1,1)	C-6	Optimal	192	192	1	4.16054	0	0
C30x30-5-1_10_10_50-2_5-5.dat	2	5	6	(1,1)	C-6	Optimal	174	174	1	14.2572	0	1
C30x30-5-1_10_10_50-2_7-1.dat	2	8	9	(1,1)	C-6	Optimal	293	293	1	35.6821	0	0
C30x30-5-1_10_10_50-2_7-2.dat	2	7	8	(1,1)	C-6	Optimal	265	265	1	34.6542	0	1
C30x30-5-1_10_10_50-2_7-3.dat	2	6	7	(1,1)	C-6	Optimal	220	220	1	23.0015	0	1
C30x30-5-1_10_10_50-2_7-4.dat	2	7	8	(1,1)	C-6	Optimal	261	261	1	30.7217	0	0
C30x30-5-1_10_10_50-2_7-5.dat	2	7	8	(1,1)	C-6	Optimal	196	196	1	27.6882	0	0
D10x10-10-1_10_10_20-1.dat	2	9	10	(1,1)	D-4	Optimal	334	334	1	3118.33	0	0
D10x10-10-1_10_10_20-2.dat	2	9	10	(1,1)	D-4	Optimal	236	236	1	1028.91	0	0
D10x10-10-1_10_10_20-3.dat	2	10	11	(1,1)	D-4	Feasible	296	260.558	0	7200	0.119737	0
D10x10-10-1_10_10_20-4.dat	2	10	11	(1,1)	D-4	Optimal	287	287	1	2524.11	0	0
D10x10-10-1_10_10_20-5.dat	2	8	9	(1,1)	D-4	Optimal	253	253	1	699.707	0	0
D10x10-10-1_10_10_50-1.dat	2	10	11	(1,1)	D-4	Optimal	225	225	1	667.125	0	0
D10x10-10-1_10_10_50-2.dat	2	10	11	(1,1)	D-4	Optimal	371	371	1	916.295	0	0
D10x10-10-1_10_10_50-3.dat	2	7	8	(1,1)	D-4	Optimal	212	212	1	314.368	0	0
D10x10-10-1_10_10_50-4.dat	2	9	10	(1,1)	D-4	Optimal	297	297	1	757.673	0	0
D10x10-10-1_10_10_50-5.dat	2	9	10	(1,1)	D-4	Optimal	331	331	1	1496.76	0	0
D10x10-5-1_10_10_20-1.dat	2	10	11	(1,1)	D-3	Optimal	176	176	1	430.173	0	0
D10x10-5-1_10_10_20-2.dat	2	10	11	(1,1)	D-3	Optimal	163	163	1	158.743	0	0
D10x10-5-1_10_10_20-3.dat	2	9	10	(1,1)	D-3	Optimal	182	182	1	55.8531	0	0
D10x10-5-1_10_10_20-4.dat	2	9	10	(1,1)	D-3	Optimal	145	145	1	78.1969	0	0
D10x10-5-1_10_10_20-5.dat	2	9	10	(1,1)	D-3	Optimal	128	128	1	67.688	0	0
D10x10-5-1_10_10_50-1.dat	2	8	9	(1,1)	D-3	Optimal	89	89	1	38.7662	0	0
D10x10-5-1_10_10_50-2.dat	2	9	10	(1,1)	D-3	Optimal	193	193	1	124.13	0	0
D10x10-5-1_10_10_50-3.dat	2	10	11	(1,1)	D-3	Optimal	358	358	1	172.959	0	0
D10x10-5-1_10_10_50-4.dat	2	8	9	(1,1)	D-3	Optimal	217	217	1	50.8495	0	0
D10x10-5-1_10_10_50-5.dat	2	10	11	(1,1)	D-3	Optimal	154	154	1	116.333	0	0
D20x20-5-1_10_10_20-1.dat	2	19	20	(1,1)	D-5	Feasible	370	313.797	0	7200	0.1519	0
D20x20-5-1_10_10_20-2.dat	2	15	16	(1,1)	D-5	Feasible	310	261.674	0	7200	0.15589	0
D20x20-5-1_10_10_20-3.dat	2	17	18	(1,1)	D-5	Unknown	1e+75	256.377	0	7200	1	0
D20x20-5-1_10_10_20-4.dat	2	14	15	(1,1)	D-5	Optimal	214	214	1	772.605	0	0
D20x20-5-1_10_10_20-5.dat	2	17	18	(1,1)	D-5	Feasible	577	315.626	0	7200	0.452988	0
D20x20-5-1_10_10_50-1.dat	2	15	16	(1,1)	D-5	Optimal	653	653	1	1589.4	0	0
D20x20-5-1_10_10_50-2.dat	2	13	14	(1,1)	D-5	Optimal	338	338	1	208.578	0	0
D20x20-5-1_10_10_50-3.dat	2	15	16	(1,1)	D-5	Optimal	360	360	1	2861.72	0	0
D20x20-5-1_10_10_50-4.dat	2	15	16	(1,1)	D-5	Optimal	307	307	1	863.713	0	0
D20x20-5-1_10_10_50-5.dat	2	16	17	(1,1)	D-5	Optimal	391	391	1	2097.61	0	0
D5x5-5-1_10_10_20-1.dat	2	5	6	(1,1)	D-1	Optimal	66	66	1	15.145	0	0
D5x5-5-1_10_10_20-2.dat	2	4	5	(1,1)	D-1	Optimal	58	58	1	8.90648	0	0
D5x5-5-1_10_10_20-3.dat	2	5	6	(1,1)	D-1	Optimal	94	94	1	6.2294	0	0
D5x5-5-1_10_10_20-4.dat	2	5	6	(1,1)	D-1	Optimal	106	106	1	6.8181	0	0
D5x5-5-1_10_10_20-5.dat	2	5	6	(1,1)	D-1	Optimal	77	77	1	7.85608	0	0
D5x5-5-1_10_10_50-1.dat	2	5	6	(1,1)	D-1	Optimal	62	62	1	7.03046	0	0
D5x5-5-1_10_10_50-2.dat	2	5	6	(1,1)	D-1	Optimal	122	122	1	10.6171	0	0
D5x5-5-1_10_10_50-3.dat	2	5	6	(1,1)	D-1	Optimal	109	109	1	7.31641	0	0
D5x5-5-1_10_10_50-4.dat	2	5	6	(1,1)	D-1	Optimal	124	124	1	12.1229	0	0
D5x5-5-1_10_10_50-5.dat	2	4	5	(1,1)	D-1	Optimal	80	80	1	4.86424	0	0
D7x7-5-1_10_10_20-1.dat	2	7	8	(1,1)	D-2	Optimal	161	161	1	16.5989	0	0
D7x7-5-1_10_10_20-2.dat	2	6	7	(1,1)	D-2	Optimal	125	125	1	19.2287	0	0
D7x7-5-1_10_10_20-3.dat	2	5	6	(1,1)	D-2	Optimal	96	96	1	9.97447	0	0
D7x7-5-1_10_10_20-4.dat	2	6	7	(1,1)	D-2	Optimal	106	106	1	29.4131	0	0
D7x7-5-1_10_10_20-5.dat	2	7	8	(1,1)	D-2	Optimal	102	102	1	47.0175	0	0
D7x7-5-1_10_10_50-1.dat	2	7	8	(1,1)	D-2	Optimal	133	133	1	21.7816	0	0
D7x7-5-1_10_10_50-2.dat	2	5	6	(1,1)	D-2	Optimal	114	114	1	16.9355	0	0
D7x7-5-1_10_10_50-3.dat	2	6	7	(1,1)	D-2	Optimal	79	79	1	14.4349	0	0
D7x7-5-1_10_10_50-4.dat	2	7	8	(1,1)	D-2	Optimal	83	83	1	19.6383	0	0
D7x7-5-1_10_10_50-5.dat	2	6	7	(1,1)	D-2	Optimal	127	127	1	18.4171	0	0
E100-10-0.1-1.dat	2	8	9	(1,1)	E-10	Optimal	373	373	1	1310.11	0	0
E100-10-0.1-2.dat	2	9	10	(1,1)	E-10	Optimal	393	393	1	1086.79	0	0
E100-10-0.1-3.dat	2	10	11	(1,1)	E-10	Optimal	534	534	1	702.544	0	0
E100-10-0.1-4.dat	2	7	8	(1,1)	E-10	Optimal	439	439	1	223.891	0	0
E100-10-0.1-5.dat	2	7	8	(1,1)	E-10	Optimal	389	389	1	909.008	0	0
E100-10-0.2-1.dat	2	6	7	(1,1)	E-12	Feasible	541	396.576	0	7200	0.266957	0
E100-10-0.2-2.dat	2	6	7	(1,1)	E-12	Feasible	542	432.396	0	7200	0.202222	0
E100-10-0.2-3.dat	2	4	5	(1,1)	E-12	Optimal	287	287	1	613.948	0	0
E100-10-0.2-4.dat	2	7	8	(1,1)	E-12	Feasible	726	403.788	0	7200	0.443819	0
E100-10-0.2-5.dat	2	6	7	(1,1)	E-12	Feasible	526	382.477	0	7200	0.272857	0
E100-5-0.1-1.dat	2	6	7	(1,1)	E-9	Optimal	239	239	1	55.1382	0	0
E100-5-0.1-2.dat	2	6	7	(1,1)	E-9	Optimal	255	255	1	46.8136	0	1
E100-5-0.1-3.dat	2	6	7	(1,1)	E-9	Optimal	185	185	1	27.7747	0	1
E100-5-0.1-4.dat	2	6	7	(1,1)	E-9	Optimal	302	302	1	32.9635	0	0
E100-5-0.1-5.dat	2	7	8	(1,1)	E-9	Optimal	240	240	1	54.2977	0	1
E100-5-0.2-1.dat	2	6	7	(1,1)	E-11	Optimal	273	273	1	337.349	0	0
E100-5-0.2-2.dat	2	5	6	(1,1)	E-11	Optimal	211	211	1	78.7164	0	1
E100-5-0.2-3.dat	2	4	5	(1,1)	E-11	Optimal	303	303	1	85.0299	0	1
E100-5-0.2-4.dat	2	5	6	(1,1)	E-11	Optimal	214	214	1	132.163	0	0
E100-5-0.2-5.dat	2	5	6	(1,1)	E-11	Optimal	261	261	1	229.719	0	1
E50-10-0.1-1.dat	2	8	9	(1,1)	E-2	Optimal	443	443	1	42.0821	0	0
E50-10-0.1-2.dat	2	9	10	(1,1)	E-2	Infeasible	1e+75	1e+75	1	5.20036	0	0
E50-10-0.1-3.dat	2	9	10	(1,1)	E-2	Optimal	456	456	1	26.5308	0	0
E50-10-0.1-4.dat	2	12	13	(1,1)	E-2	Optimal	486	486	1	35.0789	0	0
E50-10-0.1-5.dat	2	10	11	(1,1)	E-2	Infeasible	1e+75	1e+75	1	4.23297	0	0
E50-10-0.2-1.dat	2	5	6	(1,1)	E-4	Optimal	308	308	1	167.864	0	1
E50-10-0.2-2.dat	2	7	8	(1,1)	E-4	Optimal	455	455	1	197.852	0	0
E50-10-0.2-3.dat	2	6	7	(1,1)	E-4	Optimal	317	317	1	174.457	0	1
E50-10-0.2-4.dat	2	6	7	(1,1)	E-4	Optimal	403	403	1	289.947	0	0
E50-10-0.2-5.dat	2	5	6	(1,1)	E-4	Optimal	295	295	1	447.739	0	1
E50-5-0.1-1.dat	2	7	8	(1,1)	E-1	Optimal	226	226	1	5.53882	0	0
E50-5-0.1-2.dat	2	9	10	(1,1)	E-1	Optimal	388	388	1	7.00708	0	0
E50-5-0.1-3.dat	2	8	9	(1,1)	E-1	Optimal	221	221	1	12.9415	0	0
E50-5-0.1-4.dat	2	10	11	(1,1)	E-1	Optimal	392	392	1	13.4063	0	0
E50-5-0.1-5.dat	2	9	10	(1,1)	E-1	Optimal	373	373	1	9.00559	0	0
E50-5-0.2-1.dat	2	5	6	(1,1)	E-3	Optimal	316	316	1	33.7832	0	0
E50-5-0.2-2.dat	2	7	8	(1,1)	E-3	Optimal	355	355	1	25.9503	0	0
E50-5-0.2-3.dat	2	5	6	(1,1)	E-3	Optimal	263	263	1	17.6873	0	1
E50-5-0.2-4.dat	2	5	6	(1,1)	E-3	Optimal	296	296	1	28.0166	0	0
E50-5-0.2-5.dat	2	6	7	(1,1)	E-3	Optimal	237	237	1	15.4903	0	1
E75-10-0.1-1.dat	2	9	10	(1,1)	E-6	Optimal	510	510	1	207.486	0	0
E75-10-0.1-2.dat	2	10	11	(1,1)	E-6	Optimal	421	421	1	262.861	0	0
E75-10-0.1-3.dat	2	7	8	(1,1)	E-6	Optimal	391	391	1	191.906	0	0
E75-10-0.1-4.dat	2	13	14	(1,1)	E-6	Optimal	606	606	1	335.037	0	0
E75-10-0.1-5.dat	2	9	10	(1,1)	E-6	Optimal	468	468	1	413.05	0	0
E75-10-0.2-1.dat	2	5	6	(1,1)	E-8	Optimal	354	354	1	3674.71	0	1
E75-10-0.2-2.dat	2	6	7	(1,1)	E-8	Optimal	334	334	1	739.609	0	0
E75-10-0.2-3.dat	2	6	7	(1,1)	E-8	Feasible	463	458.448	0	7200	0.00983137	0
E75-10-0.2-4.dat	2	5	6	(1,1)	E-8	Optimal	390	390	1	2573.33	0	0
E75-10-0.2-5.dat	2	6	7	(1,1)	E-8	Optimal	359	359	1	818.12	0	1
E75-5-0.1-1.dat	2	7	8	(1,1)	E-5	Optimal	239	239	1	45.7268	0	0
E75-5-0.1-2.dat	2	7	8	(1,1)	E-5	Infeasible	1e+75	1e+75	1	1.32453	0	0
E75-5-0.1-3.dat	2	6	7	(1,1)	E-5	Optimal	254	254	1	31.9592	0	0
E75-5-0.1-4.dat	2	7	8	(1,1)	E-5	Optimal	260	260	1	43.6826	0	0
E75-5-0.1-5.dat	2	6	7	(1,1)	E-5	Optimal	238	238	1	28.4929	0	0
E75-5-0.2-1.dat	2	5	6	(1,1)	E-7	Optimal	229	229	1	78.8451	0	1
E75-5-0.2-2.dat	2	5	6	(1,1)	E-7	Optimal	249	249	1	49.8121	0	1
E75-5-0.2-3.dat	2	4	5	(1,1)	E-7	Optimal	206	206	1	69.0569	0	1
E75-5-0.2-4.dat	2	7	8	(1,1)	E-7	Optimal	292	292	1	93.6956	0	0
E75-5-0.2-5.dat	2	6	7	(1,1)	E-7	Optimal	239	239	1	53.4299	0	0
RE100-10-0.1-1.dat	2	5	6	(1,1)	R-10	Feasible	1044	764.075	0	7200	0.268127	0
RE100-10-0.1-2.dat	2	5	6	(1,1)	R-10	Optimal	766	766	1	635.78	0	0
RE100-10-0.1-3.dat	2	5	6	(1,1)	R-10	Optimal	1142	1142	1	4865.53	0	0
RE100-10-0.1-4.dat	2	5	6	(1,1)	R-10	Feasible	978	923.984	0	7200	0.0552313	0
RE100-10-0.1-5.dat	2	5	6	(1,1)	R-10	Optimal	875	875	1	1765.37	0	0
RE100-10-0.2-1.dat	2	4	5	(1,1)	R-12	Feasible	1995	898.4	0	7200	0.549674	0
RE100-10-0.2-2.dat	2	4	5	(1,1)	R-12	Feasible	1171	779.464	0	7200	0.33436	0
RE100-10-0.2-3.dat	2	4	5	(1,1)	R-12	Feasible	892	834.211	0	7200	0.064786	0
RE100-10-0.2-4.dat	2	4	5	(1,1)	R-12	Optimal	781	781	1	4099.27	0	1
RE100-10-0.2-5.dat	2	4	5	(1,1)	R-12	Feasible	717	683.734	0	7200	0.0463962	0
RE100-5-0.1-1.dat	2	4	5	(1,1)	R-9	Optimal	464	464	1	41.2725	0	0
RE100-5-0.1-2.dat	2	4	5	(1,1)	R-9	Optimal	562	562	1	48.5781	0	1
RE100-5-0.1-3.dat	2	4	5	(1,1)	R-9	Optimal	511	511	1	56.8437	0	1
RE100-5-0.1-4.dat	2	6	7	(1,1)	R-9	Optimal	671	671	1	54.9288	0	0
RE100-5-0.1-5.dat	2	5	6	(1,1)	R-9	Optimal	618	618	1	76.3486	0	0
RE100-5-0.2-1.dat	2	3	4	(1,1)	R-11	Optimal	577	577	1	87.0354	0	1
RE100-5-0.2-2.dat	2	3	4	(1,1)	R-11	Optimal	478	478	1	80.5551	0	1
RE100-5-0.2-3.dat	2	3	4	(1,1)	R-11	Optimal	431	431	1	39.8579	0	1
RE100-5-0.2-4.dat	2	3	4	(1,1)	R-11	Optimal	326	326	1	46.4412	0	1
RE100-5-0.2-5.dat	2	3	4	(1,1)	R-11	Optimal	579	579	1	95.148	0	1
RE50-10-0.1-1.dat	2	5	6	(1,1)	R-2	Optimal	1116	1116	1	53.9117	0	0
RE50-10-0.1-2.dat	2	6	7	(1,1)	R-2	Optimal	885	885	1	40.319	0	0
RE50-10-0.1-3.dat	2	7	8	(1,1)	R-2	Optimal	1150	1150	1	253.266	0	0
RE50-10-0.1-4.dat	2	7	8	(1,1)	R-2	Optimal	745	745	1	148.926	0	0
RE50-10-0.1-5.dat	2	6	7	(1,1)	R-2	Optimal	1205	1205	1	117.358	0	0
RE50-10-0.2-1.dat	2	4	5	(1,1)	R-4	Optimal	996	996	1	103.196	0	0
RE50-10-0.2-2.dat	2	4	5	(1,1)	R-4	Optimal	1086	1086	1	1148.04	0	0
RE50-10-0.2-3.dat	2	4	5	(1,1)	R-4	Optimal	873	873	1	4268.23	0	1
RE50-10-0.2-4.dat	2	4	5	(1,1)	R-4	Optimal	878	878	1	126.138	0	1
RE50-10-0.2-5.dat	2	4	5	(1,1)	R-4	Optimal	891	891	1	896.13	0	1
RE50-5-0.1-1.dat	2	4	5	(1,1)	R-1	Optimal	444	444	1	3.29311	0	0
RE50-5-0.1-2.dat	2	6	7	(1,1)	R-1	Optimal	594	594	1	24.964	0	0
RE50-5-0.1-3.dat	2	6	7	(1,1)	R-1	Optimal	620	620	1	41.7397	0	0
RE50-5-0.1-4.dat	2	5	6	(1,1)	R-1	Optimal	588	588	1	10.8522	0	0
RE50-5-0.1-5.dat	2	7	8	(1,1)	R-1	Optimal	772	772	1	18.9163	0	0
RE50-5-0.2-1.dat	2	3	4	(1,1)	R-3	Optimal	440	440	1	7.78041	0	1
RE50-5-0.2-2.dat	2	4	5	(1,1)	R-3	Optimal	544	544	1	16.8339	0	1
RE50-5-0.2-3.dat	2	4	5	(1,1)	R-3	Optimal	573	573	1	26.4304	0	0
RE50-5-0.2-4.dat	2	4	5	(1,1)	R-3	Optimal	656	656	1	37.5396	0	1
RE50-5-0.2-5.dat	2	4	5	(1,1)	R-3	Optimal	704	704	1	40.4975	0	0
RE75-10-0.1-1.dat	2	5	6	(1,1)	R-6	Optimal	934	934	1	840.52	0	0
RE75-10-0.1-2.dat	2	5	6	(1,1)	R-6	Optimal	877	877	1	506.893	0	0
RE75-10-0.1-3.dat	2	5	6	(1,1)	R-6	Optimal	980	980	1	255.087	0	0
RE75-10-0.1-4.dat	2	5	6	(1,1)	R-6	Optimal	1056	1056	1	2926.54	0	0
RE75-10-0.1-5.dat	2	6	7	(1,1)	R-6	Optimal	1134	1134	1	1887.44	0	0
RE75-10-0.2-1.dat	2	4	5	(1,1)	R-8	Feasible	1210	977.658	0	7200	0.192018	0
RE75-10-0.2-2.dat	2	4	5	(1,1)	R-8	Feasible	1198	925.548	0	7200	0.227422	0
RE75-10-0.2-3.dat	2	4	5	(1,1)	R-8	Optimal	960	960	1	2293.93	0	0
RE75-10-0.2-4.dat	2	4	5	(1,1)	R-8	Feasible	1209	934.678	0	7200	0.2269	0
RE75-10-0.2-5.dat	2	3	4	(1,1)	R-8	Optimal	993	993	1	3211.19	0	0
RE75-5-0.1-1.dat	2	5	6	(1,1)	R-5	Optimal	525	525	1	35.1271	0	0
RE75-5-0.1-2.dat	2	5	6	(1,1)	R-5	Optimal	549	549	1	27.8571	0	0
RE75-5-0.1-3.dat	2	5	6	(1,1)	R-5	Optimal	543	543	1	29.7463	0	0
RE75-5-0.1-4.dat	2	5	6	(1,1)	R-5	Optimal	379	379	1	27.7545	0	1
RE75-5-0.1-5.dat	2	4	5	(1,1)	R-5	Optimal	706	706	1	20.6963	0	0
RE75-5-0.2-1.dat	2	3	4	(1,1)	R-7	Optimal	593	593	1	46.1679	0	1
RE75-5-0.2-2.dat	2	4	5	(1,1)	R-7	Optimal	459	459	1	137.369	0	1
RE75-5-0.2-3.dat	2	4	5	(1,1)	R-7	Optimal	668	668	1	183.852	0	1
RE75-5-0.2-4.dat	2	4	5	(1,1)	R-7	Optimal	473	473	1	65.4613	0	1
RE75-5-0.2-5.dat	2	3	4	(1,1)	R-7	Optimal	387	387	1	31.7797	0	1
C10x10-10-1_10_10_20-2_5-1.dat	2	5	7	(1,2)	C-2	Optimal	265	265	1	47.4338	0	0
C10x10-10-1_10_10_20-2_5-2.dat	2	6	8	(1,2)	C-2	Optimal	284	284	1	38.2189	0	0
C10x10-10-1_10_10_20-2_5-3.dat	2	6	8	(1,2)	C-2	Optimal	270	270	1	123.244	0	0
C10x10-10-1_10_10_20-2_5-4.dat	2	5	7	(1,2)	C-2	Optimal	185	185	1	12.4565	0	0
C10x10-10-1_10_10_20-2_5-5.dat	2	5	7	(1,2)	C-2	Optimal	200	200	1	16.5115	0	0
C10x10-10-1_10_10_20-2_7-1.dat	2	8	10	(1,2)	C-2	Optimal	295	295	1	129.435	0	0
C10x10-10-1_10_10_20-2_7-2.dat	2	7	9	(1,2)	C-2	Optimal	255	255	1	127.531	0	0
C10x10-10-1_10_10_20-2_7-3.dat	2	7	9	(1,2)	C-2	Optimal	273	273	1	423.394	0	0
C10x10-10-1_10_10_20-2_7-4.dat	2	7	9	(1,2)	C-2	Optimal	289	289	1	106.084	0	0
C10x10-10-1_10_10_20-2_7-5.dat	2	7	9	(1,2)	C-2	Optimal	266	266	1	142.832	0	0
C10x10-10-1_10_10_50-2_5-1.dat	2	6	8	(1,2)	C-2	Optimal	253	253	1	27.1115	0	0
C10x10-10-1_10_10_50-2_5-2.dat	2	5	7	(1,2)	C-2	Optimal	268	268	1	20.0221	0	0
C10x10-10-1_10_10_50-2_5-3.dat	2	6	8	(1,2)	C-2	Optimal	254	254	1	27.7967	0	0
C10x10-10-1_10_10_50-2_5-4.dat	2	5	7	(1,2)	C-2	Optimal	198	198	1	17.7087	0	0
C10x10-10-1_10_10_50-2_5-5.dat	2	5	7	(1,2)	C-2	Optimal	314	314	1	32.6535	0	0
C10x10-10-1_10_10_50-2_7-1.dat	2	8	10	(1,2)	C-2	Optimal	274	274	1	85.249	0	0
C10x10-10-1_10_10_50-2_7-2.dat	2	7	9	(1,2)	C-2	Optimal	227	227	1	29.0787	0	0
C10x10-10-1_10_10_50-2_7-3.dat	2	8	10	(1,2)	C-2	Optimal	233	233	1	57.9102	0	0
C10x10-10-1_10_10_50-2_7-4.dat	2	8	10	(1,2)	C-2	Optimal	239	239	1	109.136	0	0
C10x10-10-1_10_10_50-2_7-5.dat	2	7	9	(1,2)	C-2	Optimal	261	261	1	67.4478	0	0
C10x10-5-1_10_10_20-2_5-1.dat	2	4	6	(1,2)	C-1	Optimal	154	154	1	7.97507	0	0
C10x10-5-1_10_10_20-2_5-2.dat	2	5	7	(1,2)	C-1	Optimal	198	198	1	18.6977	0	0
C10x10-5-1_10_10_20-2_5-3.dat	2	5	7	(1,2)	C-1	Optimal	172	172	1	12.0561	0	0
C10x10-5-1_10_10_20-2_5-4.dat	2	5	7	(1,2)	C-1	Optimal	146	146	1	11.9929	0	0
C10x10-5-1_10_10_20-2_5-5.dat	2	5	7	(1,2)	C-1	Optimal	121	121	1	7.57206	0	0
C10x10-5-1_10_10_20-2_7-1.dat	2	8	10	(1,2)	C-1	Optimal	148	148	1	24.2364	0	0
C10x10-5-1_10_10_20-2_7-2.dat	2	7	9	(1,2)	C-1	Optimal	146	146	1	66.0226	0	0
C10x10-5-1_10_10_20-2_7-3.dat	2	6	8	(1,2)	C-1	Optimal	165	165	1	33.8106	0	1
C10x10-5-1_10_10_20-2_7-4.dat	2	6	8	(1,2)	C-1	Optimal	168	168	1	25.3312	0	0
C10x10-5-1_10_10_20-2_7-5.dat	2	7	9	(1,2)	C-1	Optimal	148	148	1	13.6659	0	0
C10x10-5-1_10_10_50-2_5-1.dat	2	6	8	(1,2)	C-1	Optimal	125	125	1	8.65771	0	0
C10x10-5-1_10_10_50-2_5-2.dat	2	4	6	(1,2)	C-1	Optimal	170	170	1	9.23766	0	0
C10x10-5-1_10_10_50-2_5-3.dat	2	4	6	(1,2)	C-1	Optimal	108	108	1	5.49293	0	0
C10x10-5-1_10_10_50-2_5-4.dat	2	6	8	(1,2)	C-1	Optimal	180	180	1	26.292	0	0
C10x10-5-1_10_10_50-2_5-5.dat	2	5	7	(1,2)	C-1	Optimal	161	161	1	17.4044	0	0
C10x10-5-1_10_10_50-2_7-1.dat	2	6	8	(1,2)	C-1	Optimal	151	151	1	16.9774	0	0
C10x10-5-1_10_10_50-2_7-2.dat	2	7	9	(1,2)	C-1	Optimal	146	146	1	28.6973	0	0
C10x10-5-1_10_10_50-2_7-3.dat	2	7	9	(1,2)	C-1	Optimal	208	208	1	28.5936	0	0
C10x10-5-1_10_10_50-2_7-4.dat	2	6	8	(1,2)	C-1	Optimal	204	204	1	24.4845	0	0
C10x10-5-1_10_10_50-2_7-5.dat	2	5	7	(1,2)	C-1	Optimal	185	185	1	14.2903	0	0
C20x20-10-1_10_10_20-2_5-1.dat	2	6	8	(1,2)	C-4	Optimal	324	324	1	32.5875	0	0
C20x20-10-1_10_10_20-2_5-2.dat	2	5	7	(1,2)	C-4	Optimal	295	295	1	18.6179	0	0
C20x20-10-1_10_10_20-2_5-3.dat	2	6	8	(1,2)	C-4	Optimal	376	376	1	121.856	0	0
C20x20-10-1_10_10_20-2_5-4.dat	2	6	8	(1,2)	C-4	Optimal	386	386	1	48.4887	0	0
C20x20-10-1_10_10_20-2_5-5.dat	2	5	7	(1,2)	C-4	Optimal	315	315	1	22.0511	0	0
C20x20-10-1_10_10_20-2_7-1.dat	2	8	10	(1,2)	C-4	Optimal	387	387	1	137.202	0	0
C20x20-10-1_10_10_20-2_7-2.dat	2	6	8	(1,2)	C-4	Optimal	468	468	1	77.1768	0	0
C20x20-10-1_10_10_20-2_7-3.dat	2	6	8	(1,2)	C-4	Optimal	379	379	1	39.4407	0	0
C20x20-10-1_10_10_20-2_7-4.dat	2	7	9	(1,2)	C-4	Optimal	380	380	1	59.7348	0	0
C20x20-10-1_10_10_20-2_7-5.dat	2	7	9	(1,2)	C-4	Optimal	298	298	1	103.043	0	0
C20x20-10-1_10_10_50-2_5-1.dat	2	6	8	(1,2)	C-4	Optimal	296	296	1	27.5669	0	0
C20x20-10-1_10_10_50-2_5-2.dat	2	5	7	(1,2)	C-4	Optimal	307	307	1	24.1549	0	0
C20x20-10-1_10_10_50-2_5-3.dat	2	6	8	(1,2)	C-4	Optimal	386	386	1	49.1197	0	0
C20x20-10-1_10_10_50-2_5-4.dat	2	6	8	(1,2)	C-4	Optimal	339	339	1	48.7363	0	0
C20x20-10-1_10_10_50-2_5-5.dat	2	5	7	(1,2)	C-4	Optimal	349	349	1	27.402	0	0
C20x20-10-1_10_10_50-2_7-1.dat	2	6	8	(1,2)	C-4	Optimal	407	407	1	41.3212	0	0
C20x20-10-1_10_10_50-2_7-2.dat	2	6	8	(1,2)	C-4	Optimal	436	436	1	67.2125	0	0
C20x20-10-1_10_10_50-2_7-3.dat	2	7	9	(1,2)	C-4	Optimal	398	398	1	76.8165	0	0
C20x20-10-1_10_10_50-2_7-4.dat	2	6	8	(1,2)	C-4	Optimal	380	380	1	44.5507	0	0
C20x20-10-1_10_10_50-2_7-5.dat	2	6	8	(1,2)	C-4	Optimal	290	290	1	41.2897	0	1
C20x20-20-1_10_10_20-2_5-1.dat	2	6	8	(1,2)	C-5	Optimal	635	635	1	89.9544	0	0
C20x20-20-1_10_10_20-2_5-2.dat	2	6	8	(1,2)	C-5	Optimal	628	628	1	95.3852	0	0
C20x20-20-1_10_10_20-2_5-3.dat	2	6	8	(1,2)	C-5	Optimal	594	594	1	86.8293	0	0
C20x20-20-1_10_10_20-2_5-4.dat	2	6	8	(1,2)	C-5	Optimal	632	632	1	224.844	0	0
C20x20-20-1_10_10_20-2_5-5.dat	2	6	8	(1,2)	C-5	Optimal	694	694	1	84.896	0	0
C20x20-20-1_10_10_20-2_7-1.dat	2	8	10	(1,2)	C-5	Feasible	759	705.782	0	7200	0.0701156	0
C20x20-20-1_10_10_20-2_7-2.dat	2	7	9	(1,2)	C-5	Optimal	670	670	1	229.586	0	0
C20x20-20-1_10_10_20-2_7-3.dat	2	8	10	(1,2)	C-5	Feasible	812	734.584	0	7200	0.0953404	0
C20x20-20-1_10_10_20-2_7-4.dat	2	8	10	(1,2)	C-5	Optimal	610	610	1	459.808	0	0
C20x20-20-1_10_10_20-2_7-5.dat	2	7	9	(1,2)	C-5	Optimal	729	729	1	332.335	0	0
C20x20-20-1_10_10_50-2_5-1.dat	2	6	8	(1,2)	C-5	Optimal	568	568	1	125.829	0	0
C20x20-20-1_10_10_50-2_5-2.dat	2	6	8	(1,2)	C-5	Optimal	624	624	1	151.847	0	0
C20x20-20-1_10_10_50-2_5-3.dat	2	6	8	(1,2)	C-5	Optimal	558	558	1	89.8197	0	0
C20x20-20-1_10_10_50-2_5-4.dat	2	5	7	(1,2)	C-5	Optimal	623	623	1	56.3339	0	0
C20x20-20-1_10_10_50-2_5-5.dat	2	6	8	(1,2)	C-5	Optimal	593	593	1	80.2913	0	0
C20x20-20-1_10_10_50-2_7-1.dat	2	7	9	(1,2)	C-5	Optimal	645	645	1	162.226	0	0
C20x20-20-1_10_10_50-2_7-2.dat	2	8	10	(1,2)	C-5	Optimal	717	717	1	258.644	0	0
C20x20-20-1_10_10_50-2_7-3.dat	2	8	10	(1,2)	C-5	Optimal	724	724	1	3599.75	0	0
C20x20-20-1_10_10_50-2_7-4.dat	2	7	9	(1,2)	C-5	Optimal	665	665	1	135.944	0	0
C20x20-20-1_10_10_50-2_7-5.dat	2	8	10	(1,2)	C-5	Optimal	646	646	1	283.585	0	0
C20x20-5-1_10_10_20-2_5-1.dat	2	5	7	(1,2)	C-3	Optimal	166	166	1	17.8094	0	0
C20x20-5-1_10_10_20-2_5-2.dat	2	4	6	(1,2)	C-3	Optimal	161	161	1	11.3092	0	1
C20x20-5-1_10_10_20-2_5-3.dat	2	5	7	(1,2)	C-3	Optimal	187	187	1	16.1062	0	0
C20x20-5-1_10_10_20-2_5-4.dat	2	5	7	(1,2)	C-3	Optimal	206	206	1	17.1378	0	0
C20x20-5-1_10_10_20-2_5-5.dat	2	5	7	(1,2)	C-3	Optimal	183	183	1	18.9516	0	0
C20x20-5-1_10_10_20-2_7-1.dat	2	8	10	(1,2)	C-3	Optimal	197	197	1	29.7983	0	1
C20x20-5-1_10_10_20-2_7-2.dat	2	7	9	(1,2)	C-3	Optimal	243	243	1	30.7163	0	0
C20x20-5-1_10_10_20-2_7-3.dat	2	7	9	(1,2)	C-3	Optimal	201	201	1	32.4354	0	0
C20x20-5-1_10_10_20-2_7-4.dat	2	8	10	(1,2)	C-3	Optimal	204	204	1	32.7032	0	0
C20x20-5-1_10_10_20-2_7-5.dat	2	7	9	(1,2)	C-3	Optimal	180	180	1	37.2988	0	1
C20x20-5-1_10_10_50-2_5-1.dat	2	4	6	(1,2)	C-3	Optimal	162	162	1	8.31206	0	0
C20x20-5-1_10_10_50-2_5-2.dat	2	5	7	(1,2)	C-3	Optimal	213	213	1	16.1746	0	0
C20x20-5-1_10_10_50-2_5-3.dat	2	6	8	(1,2)	C-3	Optimal	213	213	1	30.4417	0	0
C20x20-5-1_10_10_50-2_5-4.dat	2	4	6	(1,2)	C-3	Optimal	159	159	1	8.22215	0	0
C20x20-5-1_10_10_50-2_5-5.dat	2	5	7	(1,2)	C-3	Optimal	188	188	1	12.5545	0	0
C20x20-5-1_10_10_50-2_7-1.dat	2	6	8	(1,2)	C-3	Optimal	226	226	1	29.325	0	0
C20x20-5-1_10_10_50-2_7-2.dat	2	4	6	(1,2)	C-3	Optimal	162	162	1	7.88377	0	0
C20x20-5-1_10_10_50-2_7-3.dat	2	8	10	(1,2)	C-3	Optimal	293	293	1	43.6232	0	0
C20x20-5-1_10_10_50-2_7-4.dat	2	6	8	(1,2)	C-3	Optimal	212	212	1	31.0706	0	0
C20x20-5-1_10_10_50-2_7-5.dat	2	5	7	(1,2)	C-3	Optimal	200	200	1	15.2293	0	0
C30x30-10-1_10_10_20-2_5-1.dat	2	6	8	(1,2)	C-7	Optimal	385	385	1	39.4762	0	0
C30x30-10-1_10_10_20-2_5-2.dat	2	6	8	(1,2)	C-7	Optimal	382	382	1	34.8049	0	0
C30x30-10-1_10_10_20-2_5-3.dat	2	6	8	(1,2)	C-7	Optimal	363	363	1	31.5496	0	0
C30x30-10-1_10_10_20-2_5-4.dat	2	6	8	(1,2)	C-7	Optimal	400	400	1	50.6611	0	0
C30x30-10-1_10_10_20-2_5-5.dat	2	5	7	(1,2)	C-7	Optimal	392	392	1	32.4653	0	0
C30x30-10-1_10_10_20-2_7-1.dat	2	6	8	(1,2)	C-7	Optimal	481	481	1	56.0318	0	0
C30x30-10-1_10_10_20-2_7-2.dat	2	6	8	(1,2)	C-7	Optimal	399	399	1	45.7215	0	0
C30x30-10-1_10_10_20-2_7-3.dat	2	8	10	(1,2)	C-7	Optimal	489	489	1	99.512	0	0
C30x30-10-1_10_10_20-2_7-4.dat	2	8	10	(1,2)	C-7	Optimal	412	412	1	138.858	0	0
C30x30-10-1_10_10_20-2_7-5.dat	2	7	9	(1,2)	C-7	Optimal	509	509	1	56.1274	0	0
C30x30-10-1_10_10_50-2_5-1.dat	2	5	7	(1,2)	C-7	Optimal	278	278	1	35.4386	0	0
C30x30-10-1_10_10_50-2_5-2.dat	2	5	7	(1,2)	C-7	Optimal	369	369	1	23.6788	0	0
C30x30-10-1_10_10_50-2_5-3.dat	2	6	8	(1,2)	C-7	Optimal	400	400	1	51.335	0	0
C30x30-10-1_10_10_50-2_5-4.dat	2	6	8	(1,2)	C-7	Optimal	337	337	1	32.2384	0	0
C30x30-10-1_10_10_50-2_5-5.dat	2	5	7	(1,2)	C-7	Optimal	368	368	1	26.3461	0	0
C30x30-10-1_10_10_50-2_7-1.dat	2	8	10	(1,2)	C-7	Optimal	415	415	1	76.2843	0	0
C30x30-10-1_10_10_50-2_7-2.dat	2	7	9	(1,2)	C-7	Optimal	482	482	1	59.8315	0	0
C30x30-10-1_10_10_50-2_7-3.dat	2	8	10	(1,2)	C-7	Optimal	469	469	1	82.3704	0	0
C30x30-10-1_10_10_50-2_7-4.dat	2	7	9	(1,2)	C-7	Optimal	509	509	1	74.2054	0	0
C30x30-10-1_10_10_50-2_7-5.dat	2	7	9	(1,2)	C-7	Optimal	475	475	1	71.0907	0	0
C30x30-20-1_10_10_20-2_5-1.dat	2	6	8	(1,2)	C-8	Optimal	701	701	1	98.9393	0	0
C30x30-20-1_10_10_20-2_5-2.dat	2	6	8	(1,2)	C-8	Optimal	579	579	1	57.0546	0	0
C30x30-20-1_10_10_20-2_5-3.dat	2	5	7	(1,2)	C-8	Optimal	679	679	1	52.3492	0	0
C30x30-20-1_10_10_20-2_5-4.dat	2	5	7	(1,2)	C-8	Optimal	592	592	1	53.0198	0	0
C30x30-20-1_10_10_20-2_5-5.dat	2	5	7	(1,2)	C-8	Optimal	581	581	1	66.828	0	0
C30x30-20-1_10_10_20-2_7-1.dat	2	8	10	(1,2)	C-8	Optimal	804	804	1	171.55	0	0
C30x30-20-1_10_10_20-2_7-2.dat	2	7	9	(1,2)	C-8	Optimal	711	711	1	232.058	0	0
C30x30-20-1_10_10_20-2_7-3.dat	2	8	10	(1,2)	C-8	Optimal	817	817	1	155.095	0	0
C30x30-20-1_10_10_20-2_7-4.dat	2	8	10	(1,2)	C-8	Optimal	841	841	1	1153.92	0	0
C30x30-20-1_10_10_20-2_7-5.dat	2	7	9	(1,2)	C-8	Optimal	893	893	1	319.308	0	0
C30x30-20-1_10_10_50-2_5-1.dat	2	6	8	(1,2)	C-8	Optimal	628	628	1	72.8299	0	0
C30x30-20-1_10_10_50-2_5-2.dat	2	6	8	(1,2)	C-8	Optimal	701	701	1	71.2798	0	0
C30x30-20-1_10_10_50-2_5-3.dat	2	5	7	(1,2)	C-8	Optimal	661	661	1	49.2876	0	0
C30x30-20-1_10_10_50-2_5-4.dat	2	6	8	(1,2)	C-8	Optimal	624	624	1	81.4061	0	0
C30x30-20-1_10_10_50-2_5-5.dat	2	6	8	(1,2)	C-8	Optimal	722	722	1	106.286	0	0
C30x30-20-1_10_10_50-2_7-1.dat	2	7	9	(1,2)	C-8	Optimal	808	808	1	152.527	0	0
C30x30-20-1_10_10_50-2_7-2.dat	2	7	9	(1,2)	C-8	Optimal	744	744	1	143.736	0	0
C30x30-20-1_10_10_50-2_7-3.dat	2	8	10	(1,2)	C-8	Optimal	864	864	1	186.599	0	0
C30x30-20-1_10_10_50-2_7-4.dat	2	8	10	(1,2)	C-8	Optimal	833	833	1	167.554	0	0
C30x30-20-1_10_10_50-2_7-5.dat	2	8	10	(1,2)	C-8	Optimal	785	785	1	464.495	0	0
C30x30-30-1_10_10_20-2_5-1.dat	2	6	8	(1,2)	C-9	Optimal	1066	1066	1	150.774	0	0
C30x30-30-1_10_10_20-2_5-2.dat	2	6	8	(1,2)	C-9	Optimal	943	943	1	912.432	0	0
C30x30-30-1_10_10_20-2_5-3.dat	2	6	8	(1,2)	C-9	Optimal	871	871	1	160.202	0	0
C30x30-30-1_10_10_20-2_5-4.dat	2	6	8	(1,2)	C-9	Optimal	933	933	1	167.192	0	0
C30x30-30-1_10_10_20-2_5-5.dat	2	6	8	(1,2)	C-9	Optimal	931	931	1	237.733	0	0
C30x30-30-1_10_10_20-2_7-1.dat	2	8	10	(1,2)	C-9	Feasible	1040	1029.99	0	7200	0.00962657	0
C30x30-30-1_10_10_20-2_7-2.dat	2	8	10	(1,2)	C-9	Feasible	1126	1114.59	0	7200	0.010135	0
C30x30-30-1_10_10_20-2_7-3.dat	2	8	10	(1,2)	C-9	Feasible	1341	1178.38	0	7200	0.121266	0
C30x30-30-1_10_10_20-2_7-4.dat	2	8	10	(1,2)	C-9	Feasible	1242	1207.66	0	7200	0.027648	0
C30x30-30-1_10_10_20-2_7-5.dat	2	7	9	(1,2)	C-9	Optimal	1106	1106	1	433.172	0	0
C30x30-30-1_10_10_50-2_5-1.dat	2	6	8	(1,2)	C-9	Optimal	978	978	1	177.946	0	0
C30x30-30-1_10_10_50-2_5-2.dat	2	6	8	(1,2)	C-9	Optimal	908	908	1	142.004	0	0
C30x30-30-1_10_10_50-2_5-3.dat	2	5	7	(1,2)	C-9	Optimal	929	929	1	91.9672	0	0
C30x30-30-1_10_10_50-2_5-4.dat	2	6	8	(1,2)	C-9	Optimal	917	917	1	154.565	0	0
C30x30-30-1_10_10_50-2_5-5.dat	2	6	8	(1,2)	C-9	Optimal	867	867	1	135.807	0	0
C30x30-30-1_10_10_50-2_7-1.dat	2	8	10	(1,2)	C-9	Optimal	1071	1071	1	1726.01	0	0
C30x30-30-1_10_10_50-2_7-2.dat	2	8	10	(1,2)	C-9	Optimal	978	978	1	601.759	0	0
C30x30-30-1_10_10_50-2_7-3.dat	2	8	10	(1,2)	C-9	Optimal	1173	1173	1	1333.7	0	0
C30x30-30-1_10_10_50-2_7-4.dat	2	8	10	(1,2)	C-9	Optimal	962	962	1	702.211	0	0
C30x30-30-1_10_10_50-2_7-5.dat	2	8	10	(1,2)	C-9	Optimal	1036	1036	1	306.731	0	0
C30x30-5-1_10_10_20-2_5-1.dat	2	5	7	(1,2)	C-6	Optimal	160	160	1	12.151	0	0
C30x30-5-1_10_10_20-2_5-2.dat	2	5	7	(1,2)	C-6	Optimal	180	180	1	19.4615	0	1
C30x30-5-1_10_10_20-2_5-3.dat	2	5	7	(1,2)	C-6	Optimal	159	159	1	13.3742	0	0
C30x30-5-1_10_10_20-2_5-4.dat	2	4	6	(1,2)	C-6	Optimal	162	162	1	16.0743	0	1
C30x30-5-1_10_10_20-2_5-5.dat	2	5	7	(1,2)	C-6	Optimal	189	189	1	21.1091	0	0
C30x30-5-1_10_10_20-2_7-1.dat	2	5	7	(1,2)	C-6	Optimal	150	150	1	13.3296	0	1
C30x30-5-1_10_10_20-2_7-2.dat	2	6	8	(1,2)	C-6	Optimal	228	228	1	21.3914	0	0
C30x30-5-1_10_10_20-2_7-3.dat	2	7	9	(1,2)	C-6	Optimal	242	242	1	60.8487	0	0
C30x30-5-1_10_10_20-2_7-4.dat	2	7	9	(1,2)	C-6	Optimal	214	214	1	46.4742	0	0
C30x30-5-1_10_10_20-2_7-5.dat	2	6	8	(1,2)	C-6	Optimal	197	197	1	23.6885	0	1
C30x30-5-1_10_10_50-2_5-1.dat	2	4	6	(1,2)	C-6	Optimal	159	159	1	10.9785	0	0
C30x30-5-1_10_10_50-2_5-2.dat	2	5	7	(1,2)	C-6	Optimal	205	205	1	15.9	0	0
C30x30-5-1_10_10_50-2_5-3.dat	2	5	7	(1,2)	C-6	Optimal	210	210	1	18.3192	0	1
C30x30-5-1_10_10_50-2_5-4.dat	2	4	6	(1,2)	C-6	Optimal	191	191	1	10.7147	0	0
C30x30-5-1_10_10_50-2_5-5.dat	2	5	7	(1,2)	C-6	Optimal	171	171	1	19.526	0	1
C30x30-5-1_10_10_50-2_7-1.dat	2	8	10	(1,2)	C-6	Optimal	291	291	1	42.9458	0	0
C30x30-5-1_10_10_50-2_7-2.dat	2	7	9	(1,2)	C-6	Optimal	265	265	1	36.2853	0	1
C30x30-5-1_10_10_50-2_7-3.dat	2	6	8	(1,2)	C-6	Optimal	220	220	1	20.7959	0	1
C30x30-5-1_10_10_50-2_7-4.dat	2	7	9	(1,2)	C-6	Optimal	258	258	1	76.4118	0	0
C30x30-5-1_10_10_50-2_7-5.dat	2	7	9	(1,2)	C-6	Optimal	196	196	1	30.3359	0	0
D10x10-10-1_10_10_20-1.dat	2	9	11	(1,2)	D-4	Optimal	293	293	1	1072.32	0	0
D10x10-10-1_10_10_20-2.dat	2	9	11	(1,2)	D-4	Optimal	220	220	1	699.39	0	0
D10x10-10-1_10_10_20-3.dat	2	10	12	(1,2)	D-4	Feasible	263	245.843	0	7200	0.0652353	0
D10x10-10-1_10_10_20-4.dat	2	10	12	(1,2)	D-4	Optimal	270	270	1	2282.47	0	0
D10x10-10-1_10_10_20-5.dat	2	8	10	(1,2)	D-4	Optimal	234	234	1	923.275	0	0
D10x10-10-1_10_10_50-1.dat	2	10	12	(1,2)	D-4	Optimal	200	200	1	637.951	0	0
D10x10-10-1_10_10_50-2.dat	2	10	12	(1,2)	D-4	Optimal	349	349	1	427.816	0	0
D10x10-10-1_10_10_50-3.dat	2	7	9	(1,2)	D-4	Optimal	189	189	1	239.957	0	0
D10x10-10-1_10_10_50-4.dat	2	9	11	(1,2)	D-4	Optimal	260	260	1	888.876	0	0
D10x10-10-1_10_10_50-5.dat	2	9	11	(1,2)	D-4	Optimal	304	304	1	2275.21	0	0
D10x10-5-1_10_10_20-1.dat	2	10	12	(1,2)	D-3	Optimal	153	153	1	219.029	0	0
D10x10-5-1_10_10_20-2.dat	2	10	12	(1,2)	D-3	Optimal	152	152	1	134.095	0	0
D10x10-5-1_10_10_20-3.dat	2	9	11	(1,2)	D-3	Optimal	174	174	1	85.4783	0	0
D10x10-5-1_10_10_20-4.dat	2	9	11	(1,2)	D-3	Optimal	141	141	1	94.7369	0	0
D10x10-5-1_10_10_20-5.dat	2	9	11	(1,2)	D-3	Optimal	123	123	1	66.3835	0	0
D10x10-5-1_10_10_50-1.dat	2	8	10	(1,2)	D-3	Optimal	83	83	1	30.2566	0	0
D10x10-5-1_10_10_50-2.dat	2	9	11	(1,2)	D-3	Optimal	184	184	1	192.389	0	0
D10x10-5-1_10_10_50-3.dat	2	10	12	(1,2)	D-3	Optimal	326	326	1	180.365	0	0
D10x10-5-1_10_10_50-4.dat	2	8	10	(1,2)	D-3	Optimal	209	209	1	69.0799	0	0
D10x10-5-1_10_10_50-5.dat	2	10	12	(1,2)	D-3	Optimal	139	139	1	101.631	0	0
D20x20-5-1_10_10_20-1.dat	2	19	21	(1,2)	D-5	Feasible	465	298.169	0	7200	0.358776	0
D20x20-5-1_10_10_20-2.dat	2	15	17	(1,2)	D-5	Feasible	260	243.572	0	7200	0.0631828	0
D20x20-5-1_10_10_20-3.dat	2	17	19	(1,2)	D-5	Feasible	322	252.867	0	7200	0.2147	0
D20x20-5-1_10_10_20-4.dat	2	14	16	(1,2)	D-5	Optimal	200	200	1	272.254	0	0
D20x20-5-1_10_10_20-5.dat	2	17	19	(1,2)	D-5	Feasible	551	296.547	0	7200	0.461802	0
D20x20-5-1_10_10_50-1.dat	2	15	17	(1,2)	D-5	Feasible	680	582.627	0	7200	0.143196	0
D20x20-5-1_10_10_50-2.dat	2	13	15	(1,2)	D-5	Optimal	323	323	1	315.364	0	0
D20x20-5-1_10_10_50-3.dat	2	15	17	(1,2)	D-5	Optimal	327	327	1	907.291	0	0
D20x20-5-1_10_10_50-4.dat	2	15	17	(1,2)	D-5	Optimal	288	288	1	728.919	0	0
D20x20-5-1_10_10_50-5.dat	2	16	18	(1,2)	D-5	Optimal	364	364	1	1462.74	0	0
D5x5-5-1_10_10_20-1.dat	2	5	7	(1,2)	D-1	Optimal	54	54	1	7.84417	0	0
D5x5-5-1_10_10_20-2.dat	2	4	6	(1,2)	D-1	Optimal	52	52	1	4.05532	0	0
D5x5-5-1_10_10_20-3.dat	2	5	7	(1,2)	D-1	Optimal	89	89	1	10.1557	0	0
D5x5-5-1_10_10_20-4.dat	2	5	7	(1,2)	D-1	Optimal	93	93	1	8.05445	0	0
D5x5-5-1_10_10_20-5.dat	2	5	7	(1,2)	D-1	Optimal	69	69	1	7.07742	0	0
D5x5-5-1_10_10_50-1.dat	2	5	7	(1,2)	D-1	Optimal	57	57	1	5.06662	0	0
D5x5-5-1_10_10_50-2.dat	2	5	7	(1,2)	D-1	Optimal	108	108	1	9.04885	0	0
D5x5-5-1_10_10_50-3.dat	2	5	7	(1,2)	D-1	Optimal	100	100	1	9.29472	0	0
D5x5-5-1_10_10_50-4.dat	2	5	7	(1,2)	D-1	Optimal	113	113	1	13.7524	0	0
D5x5-5-1_10_10_50-5.dat	2	4	6	(1,2)	D-1	Optimal	74	74	1	6.13266	0	0
D7x7-5-1_10_10_20-1.dat	2	7	9	(1,2)	D-2	Optimal	157	157	1	19.4575	0	0
D7x7-5-1_10_10_20-2.dat	2	6	8	(1,2)	D-2	Optimal	119	119	1	29.1433	0	0
D7x7-5-1_10_10_20-3.dat	2	5	7	(1,2)	D-2	Optimal	95	95	1	11.4141	0	0
D7x7-5-1_10_10_20-4.dat	2	6	8	(1,2)	D-2	Optimal	90	90	1	20.0648	0	0
D7x7-5-1_10_10_20-5.dat	2	7	9	(1,2)	D-2	Optimal	96	96	1	48.7825	0	0
D7x7-5-1_10_10_50-1.dat	2	7	9	(1,2)	D-2	Optimal	124	124	1	24.459	0	0
D7x7-5-1_10_10_50-2.dat	2	5	7	(1,2)	D-2	Optimal	98	98	1	12.4046	0	0
D7x7-5-1_10_10_50-3.dat	2	6	8	(1,2)	D-2	Optimal	74	74	1	14.9817	0	0
D7x7-5-1_10_10_50-4.dat	2	7	9	(1,2)	D-2	Optimal	82	82	1	20.7318	0	0
D7x7-5-1_10_10_50-5.dat	2	6	8	(1,2)	D-2	Optimal	117	117	1	30.7402	0	0
E100-10-0.1-1.dat	2	8	10	(1,2)	E-10	Optimal	358	358	1	1078.56	0	0
E100-10-0.1-2.dat	2	9	11	(1,2)	E-10	Optimal	378	378	1	748.9	0	0
E100-10-0.1-3.dat	2	10	12	(1,2)	E-10	Optimal	525	525	1	4069.06	0	0
E100-10-0.1-4.dat	2	7	9	(1,2)	E-10	Optimal	407	407	1	292.197	0	0
E100-10-0.1-5.dat	2	7	9	(1,2)	E-10	Optimal	365	365	1	670.344	0	0
E100-10-0.2-1.dat	2	6	8	(1,2)	E-12	Feasible	400	388.923	0	7200	0.0276934	0
E100-10-0.2-2.dat	2	6	8	(1,2)	E-12	Feasible	761	389.524	0	7200	0.488142	0
E100-10-0.2-3.dat	2	4	6	(1,2)	E-12	Optimal	282	282	1	1431.83	0	0
E100-10-0.2-4.dat	2	7	9	(1,2)	E-12	Feasible	474	392.693	0	7200	0.171535	0
E100-10-0.2-5.dat	2	6	8	(1,2)	E-12	Feasible	577	361.197	0	7200	0.374009	0
E100-5-0.1-1.dat	2	6	8	(1,2)	E-9	Optimal	232	232	1	65.7452	0	1
E100-5-0.1-2.dat	2	6	8	(1,2)	E-9	Optimal	237	237	1	33.4881	0	1
E100-5-0.1-3.dat	2	6	8	(1,2)	E-9	Optimal	185	185	1	46.5332	0	1
E100-5-0.1-4.dat	2	6	8	(1,2)	E-9	Optimal	283	283	1	26.0767	0	0
E100-5-0.1-5.dat	2	7	9	(1,2)	E-9	Optimal	237	237	1	76.5976	0	1
E100-5-0.2-1.dat	2	6	8	(1,2)	E-11	Optimal	265	265	1	286.337	0	1
E100-5-0.2-2.dat	2	5	7	(1,2)	E-11	Optimal	209	209	1	99.8912	0	1
E100-5-0.2-3.dat	2	4	6	(1,2)	E-11	Optimal	286	286	1	148.442	0	1
E100-5-0.2-4.dat	2	5	7	(1,2)	E-11	Optimal	211	211	1	285.446	0	1
[truncated: 13,751 more rows]

## Sheet: Table7Results
Dataset Name	K	Hp	Hb	Category	Group	Status	Upper Bound	Lower Bound	isSolved	solTime	Gap
C10x10-10-1_10_10_20-2_5-1.dat	2	9	14	(0,0)	C-2	Optimal	229	229	1	93.2324	0
C10x10-10-1_10_10_20-2_5-2.dat	2	10	15	(0,0)	C-2	Optimal	248	248	1	77.6358	0
C10x10-10-1_10_10_20-2_5-3.dat	2	10	15	(0,0)	C-2	Optimal	218	218	1	139.021	0
C10x10-10-1_10_10_20-2_5-4.dat	2	9	14	(0,0)	C-2	Optimal	169	169	1	25.9982	0
C10x10-10-1_10_10_20-2_5-5.dat	2	9	14	(0,0)	C-2	Optimal	181	181	1	20.8447	0
C10x10-10-1_10_10_20-2_7-1.dat	2	12	17	(0,0)	C-2	Optimal	243	243	1	343.97	0
C10x10-10-1_10_10_20-2_7-2.dat	2	11	16	(0,0)	C-2	Optimal	222	222	1	2749.96	0
C10x10-10-1_10_10_20-2_7-3.dat	2	11	16	(0,0)	C-2	Optimal	210	210	1	78.7429	0
C10x10-10-1_10_10_20-2_7-4.dat	2	11	16	(0,0)	C-2	Optimal	222	222	1	471.434	0
C10x10-10-1_10_10_20-2_7-5.dat	2	11	16	(0,0)	C-2	Optimal	212	212	1	393.799	0
C10x10-10-1_10_10_50-2_5-1.dat	2	10	15	(0,0)	C-2	Optimal	225	225	1	122.615	0
C10x10-10-1_10_10_50-2_5-2.dat	2	9	14	(0,0)	C-2	Optimal	238	238	1	44.1085	0
C10x10-10-1_10_10_50-2_5-3.dat	2	10	15	(0,0)	C-2	Optimal	217	217	1	78.0249	0
C10x10-10-1_10_10_50-2_5-4.dat	2	9	14	(0,0)	C-2	Optimal	154	154	1	34.4403	0
C10x10-10-1_10_10_50-2_5-5.dat	2	9	14	(0,0)	C-2	Optimal	250	250	1	175.171	0
C10x10-10-1_10_10_50-2_7-1.dat	2	12	17	(0,0)	C-2	Optimal	214	214	1	955.331	0
C10x10-10-1_10_10_50-2_7-2.dat	2	11	16	(0,0)	C-2	Optimal	206	206	1	118.161	0
C10x10-10-1_10_10_50-2_7-3.dat	2	12	17	(0,0)	C-2	Optimal	197	197	1	74.5861	0
C10x10-10-1_10_10_50-2_7-4.dat	2	12	17	(0,0)	C-2	Optimal	190	190	1	301.356	0
C10x10-10-1_10_10_50-2_7-5.dat	2	11	16	(0,0)	C-2	Optimal	184	184	1	257.758	0
C10x10-5-1_10_10_20-2_5-1.dat	2	8	13	(0,0)	C-1	Optimal	151	151	1	22.2114	0
C10x10-5-1_10_10_20-2_5-2.dat	2	9	14	(0,0)	C-1	Optimal	173	173	1	42.3035	0
C10x10-5-1_10_10_20-2_5-3.dat	2	9	14	(0,0)	C-1	Optimal	145	145	1	29.478	0
C10x10-5-1_10_10_20-2_5-4.dat	2	9	14	(0,0)	C-1	Optimal	137	137	1	42.7689	0
C10x10-5-1_10_10_20-2_5-5.dat	2	9	14	(0,0)	C-1	Optimal	112	112	1	14.8187	0
C10x10-5-1_10_10_20-2_7-1.dat	2	12	17	(0,0)	C-1	Optimal	131	131	1	35.3041	0
C10x10-5-1_10_10_20-2_7-2.dat	2	11	16	(0,0)	C-1	Optimal	117	117	1	68.9074	0
C10x10-5-1_10_10_20-2_7-3.dat	2	10	15	(0,0)	C-1	Optimal	131	131	1	36.957	0
C10x10-5-1_10_10_20-2_7-4.dat	2	10	15	(0,0)	C-1	Optimal	150	150	1	62.0402	0
C10x10-5-1_10_10_20-2_7-5.dat	2	11	16	(0,0)	C-1	Optimal	146	146	1	33.098	0
C10x10-5-1_10_10_50-2_5-1.dat	2	10	15	(0,0)	C-1	Optimal	125	125	1	15.9412	0
C10x10-5-1_10_10_50-2_5-2.dat	2	8	13	(0,0)	C-1	Optimal	118	118	1	30.8443	0
C10x10-5-1_10_10_50-2_5-3.dat	2	8	13	(0,0)	C-1	Optimal	97	97	1	12.7478	0
C10x10-5-1_10_10_50-2_5-4.dat	2	10	15	(0,0)	C-1	Optimal	138	138	1	31.1525	0
C10x10-5-1_10_10_50-2_5-5.dat	2	9	14	(0,0)	C-1	Optimal	130	130	1	39.7058	0
C10x10-5-1_10_10_50-2_7-1.dat	2	10	15	(0,0)	C-1	Optimal	132	132	1	39.6301	0
C10x10-5-1_10_10_50-2_7-2.dat	2	11	16	(0,0)	C-1	Optimal	115	115	1	37.6923	0
C10x10-5-1_10_10_50-2_7-3.dat	2	11	16	(0,0)	C-1	Optimal	185	185	1	132.967	0
C10x10-5-1_10_10_50-2_7-4.dat	2	10	15	(0,0)	C-1	Optimal	170	170	1	52.5534	0
C10x10-5-1_10_10_50-2_7-5.dat	2	9	14	(0,0)	C-1	Optimal	160	160	1	30.2996	0
C20x20-10-1_10_10_20-2_5-1.dat	2	10	15	(0,0)	C-4	Optimal	291	291	1	64.9407	0
C20x20-10-1_10_10_20-2_5-2.dat	2	9	14	(0,0)	C-4	Optimal	261	261	1	72.3768	0
C20x20-10-1_10_10_20-2_5-3.dat	2	10	15	(0,0)	C-4	Optimal	325	325	1	86.2232	0
C20x20-10-1_10_10_20-2_5-4.dat	2	10	15	(0,0)	C-4	Optimal	366	366	1	142.944	0
C20x20-10-1_10_10_20-2_5-5.dat	2	9	14	(0,0)	C-4	Optimal	314	314	1	63.4831	0
C20x20-10-1_10_10_20-2_7-1.dat	2	12	17	(0,0)	C-4	Optimal	333	333	1	388.309	0
C20x20-10-1_10_10_20-2_7-2.dat	2	10	15	(0,0)	C-4	Optimal	407	407	1	211.587	0
C20x20-10-1_10_10_20-2_7-3.dat	2	10	15	(0,0)	C-4	Optimal	355	355	1	250.251	0
C20x20-10-1_10_10_20-2_7-4.dat	2	11	16	(0,0)	C-4	Optimal	342	342	1	160.48	0
C20x20-10-1_10_10_20-2_7-5.dat	2	11	16	(0,0)	C-4	Optimal	268	268	1	225.326	0
C20x20-10-1_10_10_50-2_5-1.dat	2	10	15	(0,0)	C-4	Optimal	293	293	1	62.308	0
C20x20-10-1_10_10_50-2_5-2.dat	2	9	14	(0,0)	C-4	Optimal	303	303	1	63.0527	0
C20x20-10-1_10_10_50-2_5-3.dat	2	10	15	(0,0)	C-4	Optimal	347	347	1	168.537	0
C20x20-10-1_10_10_50-2_5-4.dat	2	10	15	(0,0)	C-4	Optimal	281	281	1	139.482	0
C20x20-10-1_10_10_50-2_5-5.dat	2	9	14	(0,0)	C-4	Optimal	334	334	1	214.655	0
C20x20-10-1_10_10_50-2_7-1.dat	2	10	15	(0,0)	C-4	Optimal	373	373	1	103.535	0
C20x20-10-1_10_10_50-2_7-2.dat	2	10	15	(0,0)	C-4	Optimal	363	363	1	106.443	0
C20x20-10-1_10_10_50-2_7-3.dat	2	11	16	(0,0)	C-4	Optimal	369	369	1	431.523	0
C20x20-10-1_10_10_50-2_7-4.dat	2	10	15	(0,0)	C-4	Optimal	320	320	1	94.2295	0
C20x20-10-1_10_10_50-2_7-5.dat	2	10	15	(0,0)	C-4	Optimal	255	255	1	114.917	0
C20x20-20-1_10_10_20-2_5-1.dat	2	10	15	(0,0)	C-5	Optimal	596	596	1	4060.18	0
C20x20-20-1_10_10_20-2_5-2.dat	2	10	15	(0,0)	C-5	Feasible	556	554.055	0	7200	0.00349793
C20x20-20-1_10_10_20-2_5-3.dat	2	10	15	(0,0)	C-5	Optimal	518	518	1	748.596	0
C20x20-20-1_10_10_20-2_5-4.dat	2	10	15	(0,0)	C-5	Feasible	555	532.945	0	7200	0.039739
C20x20-20-1_10_10_20-2_5-5.dat	2	10	15	(0,0)	C-5	Optimal	634	634	1	930.299	0
C20x20-20-1_10_10_20-2_7-1.dat	2	12	17	(0,0)	C-5	Feasible	712	584.497	0	7200	0.179077
C20x20-20-1_10_10_20-2_7-2.dat	2	11	16	(0,0)	C-5	Feasible	603	555.003	0	7200	0.0795968
C20x20-20-1_10_10_20-2_7-3.dat	2	12	17	(0,0)	C-5	Feasible	1255	588.639	0	7200	0.530965
C20x20-20-1_10_10_20-2_7-4.dat	2	12	17	(0,0)	C-5	Optimal	552	552	1	2661.63	0
C20x20-20-1_10_10_20-2_7-5.dat	2	11	16	(0,0)	C-5	Feasible	903	587.46	0	7200	0.349435
C20x20-20-1_10_10_50-2_5-1.dat	2	10	15	(0,0)	C-5	Optimal	473	473	1	2710.6	0
C20x20-20-1_10_10_50-2_5-2.dat	2	10	15	(0,0)	C-5	Optimal	503	503	1	580.677	0
C20x20-20-1_10_10_50-2_5-3.dat	2	10	15	(0,0)	C-5	Optimal	480	480	1	364.012	0
C20x20-20-1_10_10_50-2_5-4.dat	2	9	14	(0,0)	C-5	Optimal	552	552	1	661.422	0
C20x20-20-1_10_10_50-2_5-5.dat	2	10	15	(0,0)	C-5	Optimal	505	505	1	295.055	0
C20x20-20-1_10_10_50-2_7-1.dat	2	11	16	(0,0)	C-5	Optimal	547	547	1	1644.16	0
C20x20-20-1_10_10_50-2_7-2.dat	2	12	17	(0,0)	C-5	Feasible	888	609.175	0	7200	0.313992
C20x20-20-1_10_10_50-2_7-3.dat	2	12	17	(0,0)	C-5	Feasible	661	566.572	0	7200	0.142856
C20x20-20-1_10_10_50-2_7-4.dat	2	11	16	(0,0)	C-5	Feasible	591	541.041	0	7200	0.0845338
C20x20-20-1_10_10_50-2_7-5.dat	2	12	17	(0,0)	C-5	Feasible	820	532.239	0	7200	0.350928
C20x20-5-1_10_10_20-2_5-1.dat	2	9	14	(0,0)	C-3	Optimal	166	166	1	53.8699	0
C20x20-5-1_10_10_20-2_5-2.dat	2	8	13	(0,0)	C-3	Optimal	130	130	1	52.7028	0
C20x20-5-1_10_10_20-2_5-3.dat	2	9	14	(0,0)	C-3	Optimal	187	187	1	35.6001	0
C20x20-5-1_10_10_20-2_5-4.dat	2	9	14	(0,0)	C-3	Optimal	196	196	1	46.7712	0
C20x20-5-1_10_10_20-2_5-5.dat	2	9	14	(0,0)	C-3	Optimal	176	176	1	41.5429	0
C20x20-5-1_10_10_20-2_7-1.dat	2	12	17	(0,0)	C-3	Optimal	195	195	1	55.1816	0
C20x20-5-1_10_10_20-2_7-2.dat	2	11	16	(0,0)	C-3	Optimal	239	239	1	125.369	0
C20x20-5-1_10_10_20-2_7-3.dat	2	11	16	(0,0)	C-3	Optimal	198	198	1	47.7299	0
C20x20-5-1_10_10_20-2_7-4.dat	2	12	17	(0,0)	C-3	Optimal	198	198	1	75.1662	0
C20x20-5-1_10_10_20-2_7-5.dat	2	11	16	(0,0)	C-3	Optimal	168	168	1	448.539	0
C20x20-5-1_10_10_50-2_5-1.dat	2	8	13	(0,0)	C-3	Optimal	139	139	1	20.473	0
C20x20-5-1_10_10_50-2_5-2.dat	2	9	14	(0,0)	C-3	Optimal	213	213	1	30.6317	0
C20x20-5-1_10_10_50-2_5-3.dat	2	10	15	(0,0)	C-3	Optimal	203	203	1	34.5249	0
C20x20-5-1_10_10_50-2_5-4.dat	2	8	13	(0,0)	C-3	Optimal	148	148	1	23.0637	0
C20x20-5-1_10_10_50-2_5-5.dat	2	9	14	(0,0)	C-3	Optimal	186	186	1	39.4568	0
C20x20-5-1_10_10_50-2_7-1.dat	2	10	15	(0,0)	C-3	Optimal	191	191	1	104.104	0
C20x20-5-1_10_10_50-2_7-2.dat	2	8	13	(0,0)	C-3	Optimal	140	140	1	23.4101	0
C20x20-5-1_10_10_50-2_7-3.dat	2	12	17	(0,0)	C-3	Optimal	267	267	1	79.0487	0
C20x20-5-1_10_10_50-2_7-4.dat	2	10	15	(0,0)	C-3	Optimal	192	192	1	35.5336	0
C20x20-5-1_10_10_50-2_7-5.dat	2	9	14	(0,0)	C-3	Optimal	198	198	1	26.3525	0
C30x30-10-1_10_10_20-2_5-1.dat	2	10	15	(0,0)	C-7	Optimal	370	370	1	86.8515	0
C30x30-10-1_10_10_20-2_5-2.dat	2	10	15	(0,0)	C-7	Optimal	372	372	1	76.4221	0
C30x30-10-1_10_10_20-2_5-3.dat	2	10	15	(0,0)	C-7	Optimal	358	358	1	90.7032	0
C30x30-10-1_10_10_20-2_5-4.dat	2	10	15	(0,0)	C-7	Optimal	386	386	1	111.85	0
C30x30-10-1_10_10_20-2_5-5.dat	2	9	14	(0,0)	C-7	Optimal	376	376	1	140.179	0
C30x30-10-1_10_10_20-2_7-1.dat	2	10	15	(0,0)	C-7	Optimal	451	451	1	144.927	0
C30x30-10-1_10_10_20-2_7-2.dat	2	10	15	(0,0)	C-7	Optimal	361	361	1	135.482	0
C30x30-10-1_10_10_20-2_7-3.dat	2	12	17	(0,0)	C-7	Optimal	468	468	1	243.59	0
C30x30-10-1_10_10_20-2_7-4.dat	2	12	17	(0,0)	C-7	Optimal	366	366	1	247.35	0
C30x30-10-1_10_10_20-2_7-5.dat	2	11	16	(0,0)	C-7	Optimal	500	500	1	129.334	0
C30x30-10-1_10_10_50-2_5-1.dat	2	9	14	(0,0)	C-7	Optimal	262	262	1	52.6232	0
C30x30-10-1_10_10_50-2_5-2.dat	2	9	14	(0,0)	C-7	Optimal	356	356	1	83.5631	0
C30x30-10-1_10_10_50-2_5-3.dat	2	10	15	(0,0)	C-7	Optimal	381	381	1	101.223	0
C30x30-10-1_10_10_50-2_5-4.dat	2	10	15	(0,0)	C-7	Optimal	318	318	1	73.2191	0
C30x30-10-1_10_10_50-2_5-5.dat	2	9	14	(0,0)	C-7	Optimal	352	352	1	204.404	0
C30x30-10-1_10_10_50-2_7-1.dat	2	12	17	(0,0)	C-7	Optimal	403	403	1	166.964	0
C30x30-10-1_10_10_50-2_7-2.dat	2	11	16	(0,0)	C-7	Optimal	442	442	1	244.863	0
C30x30-10-1_10_10_50-2_7-3.dat	2	12	17	(0,0)	C-7	Optimal	451	451	1	312.622	0
C30x30-10-1_10_10_50-2_7-4.dat	2	11	16	(0,0)	C-7	Optimal	477	477	1	286.326	0
C30x30-10-1_10_10_50-2_7-5.dat	2	11	16	(0,0)	C-7	Optimal	436	436	1	176.437	0
C30x30-20-1_10_10_20-2_5-1.dat	2	10	15	(0,0)	C-8	Optimal	659	659	1	851.129	0
C30x30-20-1_10_10_20-2_5-2.dat	2	10	15	(0,0)	C-8	Optimal	568	568	1	198.47	0
C30x30-20-1_10_10_20-2_5-3.dat	2	9	14	(0,0)	C-8	Optimal	658	658	1	274.116	0
C30x30-20-1_10_10_20-2_5-4.dat	2	9	14	(0,0)	C-8	Optimal	548	548	1	166.555	0
C30x30-20-1_10_10_20-2_5-5.dat	2	9	14	(0,0)	C-8	Optimal	516	516	1	174.729	0
C30x30-20-1_10_10_20-2_7-1.dat	2	12	17	(0,0)	C-8	Feasible	785	770.629	0	7200	0.0183066
C30x30-20-1_10_10_20-2_7-2.dat	2	11	16	(0,0)	C-8	Optimal	628	628	1	341.397	0
C30x30-20-1_10_10_20-2_7-3.dat	2	12	17	(0,0)	C-8	Optimal	778	778	1	262.284	0
C30x30-20-1_10_10_20-2_7-4.dat	2	12	17	(0,0)	C-8	Optimal	721	721	1	5559.84	0
C30x30-20-1_10_10_20-2_7-5.dat	2	11	16	(0,0)	C-8	Feasible	1068	800.031	0	7200	0.250907
C30x30-20-1_10_10_50-2_5-1.dat	2	10	15	(0,0)	C-8	Optimal	598	598	1	274.816	0
C30x30-20-1_10_10_50-2_5-2.dat	2	10	15	(0,0)	C-8	Optimal	650	650	1	145.303	0
C30x30-20-1_10_10_50-2_5-3.dat	2	9	14	(0,0)	C-8	Optimal	601	601	1	237.846	0
C30x30-20-1_10_10_50-2_5-4.dat	2	10	15	(0,0)	C-8	Optimal	605	605	1	247.874	0
C30x30-20-1_10_10_50-2_5-5.dat	2	10	15	(0,0)	C-8	Optimal	648	648	1	278.582	0
C30x30-20-1_10_10_50-2_7-1.dat	2	11	16	(0,0)	C-8	Optimal	747	747	1	1997.99	0
C30x30-20-1_10_10_50-2_7-2.dat	2	11	16	(0,0)	C-8	Optimal	680	680	1	378.98	0
C30x30-20-1_10_10_50-2_7-3.dat	2	12	17	(0,0)	C-8	Optimal	802	802	1	831.901	0
C30x30-20-1_10_10_50-2_7-4.dat	2	12	17	(0,0)	C-8	Optimal	779	779	1	2147.18	0
C30x30-20-1_10_10_50-2_7-5.dat	2	12	17	(0,0)	C-8	Feasible	707	683.158	0	7200	0.0337224
C30x30-30-1_10_10_20-2_5-1.dat	2	10	15	(0,0)	C-9	Feasible	1001	994.375	0	7200	0.00661867
C30x30-30-1_10_10_20-2_5-2.dat	2	10	15	(0,0)	C-9	Optimal	861	861	1	2491.65	0
C30x30-30-1_10_10_20-2_5-3.dat	2	10	15	(0,0)	C-9	Optimal	795	795	1	444.47	0
C30x30-30-1_10_10_20-2_5-4.dat	2	10	15	(0,0)	C-9	Optimal	848	848	1	497.955	0
C30x30-30-1_10_10_20-2_5-5.dat	2	10	15	(0,0)	C-9	Optimal	825	825	1	507.771	0
C30x30-30-1_10_10_20-2_7-1.dat	2	12	17	(0,0)	C-9	Feasible	16035	905.226	0	7200	0.943547
C30x30-30-1_10_10_20-2_7-2.dat	2	12	17	(0,0)	C-9	Feasible	1020	959.388	0	7200	0.0594236
C30x30-30-1_10_10_20-2_7-3.dat	2	12	17	(0,0)	C-9	Feasible	2578	975.512	0	7200	0.621601
C30x30-30-1_10_10_20-2_7-4.dat	2	12	17	(0,0)	C-9	Feasible	1745	1004.95	0	7200	0.424097
C30x30-30-1_10_10_20-2_7-5.dat	2	11	16	(0,0)	C-9	Feasible	1180	972.568	0	7200	0.17579
C30x30-30-1_10_10_50-2_5-1.dat	2	10	15	(0,0)	C-9	Optimal	836	836	1	610.827	0
C30x30-30-1_10_10_50-2_5-2.dat	2	10	15	(0,0)	C-9	Optimal	824	824	1	460.181	0
C30x30-30-1_10_10_50-2_5-3.dat	2	9	14	(0,0)	C-9	Optimal	849	849	1	1179.71	0
C30x30-30-1_10_10_50-2_5-4.dat	2	10	15	(0,0)	C-9	Optimal	846	846	1	627.75	0
C30x30-30-1_10_10_50-2_5-5.dat	2	10	15	(0,0)	C-9	Optimal	779	779	1	584.872	0
C30x30-30-1_10_10_50-2_7-1.dat	2	12	17	(0,0)	C-9	Feasible	1508	934.911	0	7200	0.380032
C30x30-30-1_10_10_50-2_7-2.dat	2	12	17	(0,0)	C-9	Feasible	921	855.886	0	7200	0.0706994
C30x30-30-1_10_10_50-2_7-3.dat	2	12	17	(0,0)	C-9	Feasible	1915	982.199	0	7200	0.487103
C30x30-30-1_10_10_50-2_7-4.dat	2	12	17	(0,0)	C-9	Feasible	1049	846.141	0	7200	0.193383
C30x30-30-1_10_10_50-2_7-5.dat	2	12	17	(0,0)	C-9	Feasible	1032	934.145	0	7200	0.0948205
C30x30-5-1_10_10_20-2_5-1.dat	2	9	14	(0,0)	C-6	Optimal	157	157	1	17.5877	0
C30x30-5-1_10_10_20-2_5-2.dat	2	9	14	(0,0)	C-6	Optimal	180	180	1	41.9628	0
C30x30-5-1_10_10_20-2_5-3.dat	2	9	14	(0,0)	C-6	Optimal	157	157	1	19.6579	0
C30x30-5-1_10_10_20-2_5-4.dat	2	8	13	(0,0)	C-6	Optimal	162	162	1	25.1126	0
C30x30-5-1_10_10_20-2_5-5.dat	2	9	14	(0,0)	C-6	Optimal	189	189	1	41.0213	0
C30x30-5-1_10_10_20-2_7-1.dat	2	9	14	(0,0)	C-6	Optimal	150	150	1	32.7697	0
C30x30-5-1_10_10_20-2_7-2.dat	2	10	15	(0,0)	C-6	Optimal	228	228	1	64.7582	0
C30x30-5-1_10_10_20-2_7-3.dat	2	11	16	(0,0)	C-6	Optimal	205	205	1	79.1128	0
C30x30-5-1_10_10_20-2_7-4.dat	2	11	16	(0,0)	C-6	Optimal	191	191	1	55.4854	0
C30x30-5-1_10_10_20-2_7-5.dat	2	10	15	(0,0)	C-6	Optimal	191	191	1	39.0633	0
C30x30-5-1_10_10_50-2_5-1.dat	2	8	13	(0,0)	C-6	Optimal	154	154	1	79.7726	0
C30x30-5-1_10_10_50-2_5-2.dat	2	9	14	(0,0)	C-6	Optimal	199	199	1	49.2338	0
C30x30-5-1_10_10_50-2_5-3.dat	2	9	14	(0,0)	C-6	Optimal	208	208	1	46.665	0
C30x30-5-1_10_10_50-2_5-4.dat	2	8	13	(0,0)	C-6	Optimal	175	175	1	25.8985	0
C30x30-5-1_10_10_50-2_5-5.dat	2	9	14	(0,0)	C-6	Optimal	166	166	1	331.029	0
C30x30-5-1_10_10_50-2_7-1.dat	2	12	17	(0,0)	C-6	Optimal	280	280	1	98.062	0
C30x30-5-1_10_10_50-2_7-2.dat	2	11	16	(0,0)	C-6	Optimal	262	262	1	75.903	0
C30x30-5-1_10_10_50-2_7-3.dat	2	10	15	(0,0)	C-6	Optimal	217	217	1	42.419	0
C30x30-5-1_10_10_50-2_7-4.dat	2	11	16	(0,0)	C-6	Optimal	243	243	1	223.563	0
C30x30-5-1_10_10_50-2_7-5.dat	2	11	16	(0,0)	C-6	Optimal	196	196	1	34.4536	0
D10x10-10-1_10_10_20-1.dat	2	13	18	(0,0)	D-4	Optimal	197	197	1	3539.54	0
D10x10-10-1_10_10_20-2.dat	2	13	18	(0,0)	D-4	Optimal	160	160	1	496.867	0
D10x10-10-1_10_10_20-3.dat	2	14	19	(0,0)	D-4	Optimal	177	177	1	4570.44	0
D10x10-10-1_10_10_20-4.dat	2	14	19	(0,0)	D-4	Optimal	184	184	1	558.829	0
D10x10-10-1_10_10_20-5.dat	2	12	17	(0,0)	D-4	Optimal	167	167	1	1060.77	0
D10x10-10-1_10_10_50-1.dat	2	14	19	(0,0)	D-4	Optimal	125	125	1	410.159	0
D10x10-10-1_10_10_50-2.dat	2	14	19	(0,0)	D-4	Optimal	244	244	1	4165.72	0
D10x10-10-1_10_10_50-3.dat	2	11	16	(0,0)	D-4	Optimal	120	120	1	225.192	0
D10x10-10-1_10_10_50-4.dat	2	13	18	(0,0)	D-4	Optimal	158	158	1	5127.77	0
D10x10-10-1_10_10_50-5.dat	2	13	18	(0,0)	D-4	Optimal	184	184	1	2061.54	0
D10x10-5-1_10_10_20-1.dat	2	14	19	(0,0)	D-3	Optimal	122	122	1	114.466	0
D10x10-5-1_10_10_20-2.dat	2	14	19	(0,0)	D-3	Optimal	121	121	1	91.8729	0
D10x10-5-1_10_10_20-3.dat	2	13	18	(0,0)	D-3	Optimal	135	135	1	333.866	0
D10x10-5-1_10_10_20-4.dat	2	13	18	(0,0)	D-3	Optimal	108	108	1	81.5355	0
D10x10-5-1_10_10_20-5.dat	2	13	18	(0,0)	D-3	Optimal	110	110	1	72.3003	0
D10x10-5-1_10_10_50-1.dat	2	12	17	(0,0)	D-3	Optimal	67	67	1	28.9151	0
D10x10-5-1_10_10_50-2.dat	2	13	18	(0,0)	D-3	Optimal	119	119	1	393.059	0
D10x10-5-1_10_10_50-3.dat	2	14	19	(0,0)	D-3	Optimal	184	184	1	535.744	0
D10x10-5-1_10_10_50-4.dat	2	12	17	(0,0)	D-3	Optimal	105	105	1	61.4708	0
D10x10-5-1_10_10_50-5.dat	2	14	19	(0,0)	D-3	Optimal	105	105	1	133.067	0
D20x20-5-1_10_10_20-1.dat	2	23	28	(0,0)	D-5	Feasible	852	246.475	0	7200	0.71071
D20x20-5-1_10_10_20-2.dat	2	19	24	(0,0)	D-5	Feasible	343	153.053	0	7200	0.553782
D20x20-5-1_10_10_20-3.dat	2	21	26	(0,0)	D-5	Unknown	1e+75	222.242	0	7200	1
D20x20-5-1_10_10_20-4.dat	2	18	23	(0,0)	D-5	Optimal	164	164	1	302.1	0
D20x20-5-1_10_10_20-5.dat	2	21	26	(0,0)	D-5	Unknown	1e+75	237.011	0	7200	1
D20x20-5-1_10_10_50-1.dat	2	19	24	(0,0)	D-5	Feasible	413	303.991	0	7200	0.263945
D20x20-5-1_10_10_50-2.dat	2	17	22	(0,0)	D-5	Feasible	236	204.844	0	7200	0.132018
D20x20-5-1_10_10_50-3.dat	2	19	24	(0,0)	D-5	Optimal	205	205	1	1479.36	0
D20x20-5-1_10_10_50-4.dat	2	19	24	(0,0)	D-5	Feasible	295	195.702	0	7200	0.336605
D20x20-5-1_10_10_50-5.dat	2	20	25	(0,0)	D-5	Feasible	1115	228.951	0	7200	0.794663
D5x5-5-1_10_10_20-1.dat	2	9	14	(0,0)	D-1	Optimal	51	51	1	9.90355	0
D5x5-5-1_10_10_20-2.dat	2	8	13	(0,0)	D-1	Optimal	42	42	1	4.5887	0
D5x5-5-1_10_10_20-3.dat	2	9	14	(0,0)	D-1	Optimal	70	70	1	14.4249	0
D5x5-5-1_10_10_20-4.dat	2	9	14	(0,0)	D-1	Optimal	65	65	1	7.58891	0
D5x5-5-1_10_10_20-5.dat	2	9	14	(0,0)	D-1	Optimal	50	50	1	6.00779	0
D5x5-5-1_10_10_50-1.dat	2	9	14	(0,0)	D-1	Optimal	51	51	1	6.988	0
D5x5-5-1_10_10_50-2.dat	2	9	14	(0,0)	D-1	Optimal	76	76	1	11.2464	0
D5x5-5-1_10_10_50-3.dat	2	9	14	(0,0)	D-1	Optimal	66	66	1	10.3897	0
D5x5-5-1_10_10_50-4.dat	2	9	14	(0,0)	D-1	Optimal	76	76	1	12.5193	0
D5x5-5-1_10_10_50-5.dat	2	8	13	(0,0)	D-1	Optimal	47	47	1	4.32438	0
D7x7-5-1_10_10_20-1.dat	2	11	16	(0,0)	D-2	Optimal	102	102	1	28.6551	0
D7x7-5-1_10_10_20-2.dat	2	10	15	(0,0)	D-2	Optimal	93	93	1	51.7622	0
D7x7-5-1_10_10_20-3.dat	2	9	14	(0,0)	D-2	Optimal	82	82	1	24.2086	0
D7x7-5-1_10_10_20-4.dat	2	10	15	(0,0)	D-2	Optimal	69	69	1	23.1874	0
D7x7-5-1_10_10_20-5.dat	2	11	16	(0,0)	D-2	Optimal	72	72	1	43.3704	0
D7x7-5-1_10_10_50-1.dat	2	11	16	(0,0)	D-2	Optimal	101	101	1	57.5936	0
D7x7-5-1_10_10_50-2.dat	2	9	14	(0,0)	D-2	Optimal	62	62	1	18.545	0
D7x7-5-1_10_10_50-3.dat	2	10	15	(0,0)	D-2	Optimal	68	68	1	33.917	0
D7x7-5-1_10_10_50-4.dat	2	11	16	(0,0)	D-2	Optimal	74	74	1	25.0236	0
D7x7-5-1_10_10_50-5.dat	2	10	15	(0,0)	D-2	Optimal	82	82	1	37.9407	0
E100-10-0.1-1.dat	2	12	17	(0,0)	E-10	Optimal	319	319	1	528.12	0
E100-10-0.1-2.dat	2	13	18	(0,0)	E-10	Optimal	331	331	1	628.727	0
E100-10-0.1-3.dat	2	14	19	(0,0)	E-10	Optimal	461	461	1	3578.97	0
E100-10-0.1-4.dat	2	11	16	(0,0)	E-10	Optimal	350	350	1	1990.83	0
E100-10-0.1-5.dat	2	11	16	(0,0)	E-10	Optimal	313	313	1	737.745	0
E100-10-0.2-1.dat	2	10	15	(0,0)	E-12	Optimal	343	343	1	692.249	0
E100-10-0.2-2.dat	2	10	15	(0,0)	E-12	Optimal	323	323	1	477.766	0
E100-10-0.2-3.dat	2	8	13	(0,0)	E-12	Optimal	235	235	1	302.261	0
E100-10-0.2-4.dat	2	11	16	(0,0)	E-12	Optimal	344	344	1	1942.16	0
E100-10-0.2-5.dat	2	10	15	(0,0)	E-12	Optimal	327	327	1	2103.02	0
E100-5-0.1-1.dat	2	10	15	(0,0)	E-9	Optimal	214	214	1	63.3687	0
E100-5-0.1-2.dat	2	10	15	(0,0)	E-9	Optimal	215	215	1	51.2861	0
E100-5-0.1-3.dat	2	10	15	(0,0)	E-9	Optimal	181	181	1	44.6066	0
E100-5-0.1-4.dat	2	10	15	(0,0)	E-9	Optimal	228	228	1	61.8881	0
E100-5-0.1-5.dat	2	11	16	(0,0)	E-9	Optimal	221	221	1	78.2085	0
E100-5-0.2-1.dat	2	10	15	(0,0)	E-11	Optimal	252	252	1	202.096	0
E100-5-0.2-2.dat	2	9	14	(0,0)	E-11	Optimal	206	206	1	524.177	0
E100-5-0.2-3.dat	2	8	13	(0,0)	E-11	Optimal	240	240	1	167.367	0
E100-5-0.2-4.dat	2	9	14	(0,0)	E-11	Optimal	201	201	1	470.642	0
E100-5-0.2-5.dat	2	9	14	(0,0)	E-11	Optimal	221	221	1	109.929	0
E50-10-0.1-1.dat	2	12	17	(0,0)	E-2	Optimal	347	347	1	95.9504	0
E50-10-0.1-2.dat	2	13	18	(0,0)	E-2	Optimal	350	350	1	38.2531	0
E50-10-0.1-3.dat	2	13	18	(0,0)	E-2	Optimal	354	354	1	92.8975	0
E50-10-0.1-4.dat	2	16	21	(0,0)	E-2	Optimal	471	471	1	29.4818	0
E50-10-0.1-5.dat	2	14	19	(0,0)	E-2	Optimal	384	384	1	87.6436	0
E50-10-0.2-1.dat	2	9	14	(0,0)	E-4	Optimal	224	224	1	108.433	0
E50-10-0.2-2.dat	2	11	16	(0,0)	E-4	Optimal	347	347	1	135.056	0
E50-10-0.2-3.dat	2	10	15	(0,0)	E-4	Optimal	274	274	1	80.3008	0
E50-10-0.2-4.dat	2	10	15	(0,0)	E-4	Optimal	324	324	1	174.436	0
E50-10-0.2-5.dat	2	9	14	(0,0)	E-4	Optimal	225	225	1	88.0638	0
E50-5-0.1-1.dat	2	11	16	(0,0)	E-1	Optimal	209	209	1	6.46608	0
E50-5-0.1-2.dat	2	13	18	(0,0)	E-1	Optimal	297	297	1	15.2784	0
E50-5-0.1-3.dat	2	12	17	(0,0)	E-1	Optimal	213	213	1	10.3212	0
E50-5-0.1-4.dat	2	14	19	(0,0)	E-1	Optimal	370	370	1	7.30422	0
E50-5-0.1-5.dat	2	13	18	(0,0)	E-1	Optimal	368	368	1	12.9001	0
E50-5-0.2-1.dat	2	9	14	(0,0)	E-3	Optimal	260	260	1	23.4649	0
E50-5-0.2-2.dat	2	11	16	(0,0)	E-3	Optimal	283	283	1	50.7275	0
E50-5-0.2-3.dat	2	9	14	(0,0)	E-3	Optimal	229	229	1	35.0714	0
E50-5-0.2-4.dat	2	9	14	(0,0)	E-3	Optimal	241	241	1	17.7266	0
E50-5-0.2-5.dat	2	10	15	(0,0)	E-3	Optimal	233	233	1	14.8038	0
E75-10-0.1-1.dat	2	13	18	(0,0)	E-6	Optimal	387	387	1	269.804	0
E75-10-0.1-2.dat	2	14	19	(0,0)	E-6	Optimal	331	331	1	222.777	0
E75-10-0.1-3.dat	2	11	16	(0,0)	E-6	Optimal	299	299	1	259.648	0
E75-10-0.1-4.dat	2	17	22	(0,0)	E-6	Optimal	519	519	1	395.337	0
E75-10-0.1-5.dat	2	13	18	(0,0)	E-6	Optimal	395	395	1	329.249	0
E75-10-0.2-1.dat	2	9	14	(0,0)	E-8	Optimal	278	278	1	157.557	0
E75-10-0.2-2.dat	2	10	15	(0,0)	E-8	Optimal	280	280	1	226.984	0
E75-10-0.2-3.dat	2	10	15	(0,0)	E-8	Optimal	362	362	1	1173.34	0
E75-10-0.2-4.dat	2	9	14	(0,0)	E-8	Optimal	311	311	1	222.947	0
E75-10-0.2-5.dat	2	10	15	(0,0)	E-8	Optimal	289	289	1	262.566	0
E75-5-0.1-1.dat	2	11	16	(0,0)	E-5	Optimal	214	214	1	32.8617	0
E75-5-0.1-2.dat	2	11	16	(0,0)	E-5	Optimal	213	213	1	17.9474	0
E75-5-0.1-3.dat	2	10	15	(0,0)	E-5	Optimal	240	240	1	40.6877	0
E75-5-0.1-4.dat	2	11	16	(0,0)	E-5	Optimal	227	227	1	67.9759	0
E75-5-0.1-5.dat	2	10	15	(0,0)	E-5	Optimal	202	202	1	31.4905	0
E75-5-0.2-1.dat	2	9	14	(0,0)	E-7	Optimal	212	212	1	88.0866	0
E75-5-0.2-2.dat	2	9	14	(0,0)	E-7	Optimal	229	229	1	73.883	0
E75-5-0.2-3.dat	2	8	13	(0,0)	E-7	Optimal	181	181	1	39.627	0
E75-5-0.2-4.dat	2	11	16	(0,0)	E-7	Optimal	283	283	1	153.835	0
E75-5-0.2-5.dat	2	10	15	(0,0)	E-7	Optimal	229	229	1	50.9226	0
RE100-10-0.1-1.dat	2	9	14	(0,0)	R-10	Optimal	658	658	1	1696.84	0
RE100-10-0.1-2.dat	2	9	14	(0,0)	R-10	Optimal	627	627	1	392.236	0
RE100-10-0.1-3.dat	2	9	14	(0,0)	R-10	Optimal	895	895	1	2392.61	0
RE100-10-0.1-4.dat	2	9	14	(0,0)	R-10	Optimal	698	698	1	1386.92	0
RE100-10-0.1-5.dat	2	9	14	(0,0)	R-10	Optimal	619	619	1	1506.85	0
RE100-10-0.2-1.dat	2	8	13	(0,0)	R-12	Feasible	713	668.395	0	7200	0.062559
RE100-10-0.2-2.dat	2	8	13	(0,0)	R-12	Optimal	626	626	1	4942.09	0
RE100-10-0.2-3.dat	2	8	13	(0,0)	R-12	Optimal	652	652	1	2280.66	0
RE100-10-0.2-4.dat	2	8	13	(0,0)	R-12	Optimal	563	563	1	141.445	0
RE100-10-0.2-5.dat	2	8	13	(0,0)	R-12	Optimal	494	494	1	458.69	0
RE100-5-0.1-1.dat	2	8	13	(0,0)	R-9	Optimal	332	332	1	49.1521	0
RE100-5-0.1-2.dat	2	8	13	(0,0)	R-9	Optimal	417	417	1	52.3191	0
RE100-5-0.1-3.dat	2	8	13	(0,0)	R-9	Optimal	408	408	1	56.9735	0
RE100-5-0.1-4.dat	2	10	15	(0,0)	R-9	Optimal	604	604	1	94.645	0
RE100-5-0.1-5.dat	2	9	14	(0,0)	R-9	Optimal	524	524	1	87.1575	0
RE100-5-0.2-1.dat	2	7	12	(0,0)	R-11	Optimal	402	402	1	100.283	0
RE100-5-0.2-2.dat	2	7	12	(0,0)	R-11	Optimal	384	384	1	65.7248	0
RE100-5-0.2-3.dat	2	7	12	(0,0)	R-11	Optimal	361	361	1	55.6429	0
RE100-5-0.2-4.dat	2	7	12	(0,0)	R-11	Optimal	259	259	1	31.3376	0
RE100-5-0.2-5.dat	2	7	12	(0,0)	R-11	Optimal	436	436	1	224.079	0
RE50-10-0.1-1.dat	2	9	14	(0,0)	R-2	Optimal	829	829	1	66.4554	0
RE50-10-0.1-2.dat	2	10	15	(0,0)	R-2	Optimal	696	696	1	54.2903	0
RE50-10-0.1-3.dat	2	11	16	(0,0)	R-2	Optimal	916	916	1	83.3361	0
RE50-10-0.1-4.dat	2	11	16	(0,0)	R-2	Optimal	576	576	1	54.9992	0
RE50-10-0.1-5.dat	2	10	15	(0,0)	R-2	Optimal	956	956	1	122.536	0
RE50-10-0.2-1.dat	2	8	13	(0,0)	R-4	Optimal	845	845	1	49.3062	0
RE50-10-0.2-2.dat	2	8	13	(0,0)	R-4	Optimal	803	803	1	509.695	0
RE50-10-0.2-3.dat	2	8	13	(0,0)	R-4	Optimal	641	641	1	144.356	0
RE50-10-0.2-4.dat	2	8	13	(0,0)	R-4	Optimal	679	679	1	43.2483	0
RE50-10-0.2-5.dat	2	8	13	(0,0)	R-4	Optimal	650	650	1	99.39	0
RE50-5-0.1-1.dat	2	8	13	(0,0)	R-1	Optimal	324	324	1	5.92369	0
RE50-5-0.1-2.dat	2	10	15	(0,0)	R-1	Optimal	501	501	1	19.3602	0
RE50-5-0.1-3.dat	2	10	15	(0,0)	R-1	Optimal	497	497	1	17.9566	0
RE50-5-0.1-4.dat	2	9	14	(0,0)	R-1	Optimal	391	391	1	12.1112	0
RE50-5-0.1-5.dat	2	11	16	(0,0)	R-1	Optimal	673	673	1	10.9185	0
RE50-5-0.2-1.dat	2	7	12	(0,0)	R-3	Optimal	390	390	1	14.4437	0
RE50-5-0.2-2.dat	2	8	13	(0,0)	R-3	Optimal	472	472	1	14.7702	0
RE50-5-0.2-3.dat	2	8	13	(0,0)	R-3	Optimal	508	508	1	33.1769	0
RE50-5-0.2-4.dat	2	8	13	(0,0)	R-3	Optimal	536	536	1	27.8043	0
RE50-5-0.2-5.dat	2	8	13	(0,0)	R-3	Optimal	514	514	1	17.0736	0
RE75-10-0.1-1.dat	2	9	14	(0,0)	R-6	Optimal	742	742	1	353.496	0
RE75-10-0.1-2.dat	2	9	14	(0,0)	R-6	Optimal	689	689	1	409.955	0
RE75-10-0.1-3.dat	2	9	14	(0,0)	R-6	Optimal	732	732	1	57.542	0
RE75-10-0.1-4.dat	2	9	14	(0,0)	R-6	Optimal	770	770	1	220.764	0
RE75-10-0.1-5.dat	2	10	15	(0,0)	R-6	Optimal	859	859	1	399.672	0
RE75-10-0.2-1.dat	2	8	13	(0,0)	R-8	Optimal	756	756	1	4760.87	0
RE75-10-0.2-2.dat	2	8	13	(0,0)	R-8	Optimal	726	726	1	4844.83	0
RE75-10-0.2-3.dat	2	8	13	(0,0)	R-8	Optimal	687	687	1	658.417	0
RE75-10-0.2-4.dat	2	8	13	(0,0)	R-8	Optimal	734	734	1	1370.67	0
RE75-10-0.2-5.dat	2	7	12	(0,0)	R-8	Optimal	620	620	1	1148.39	0
RE75-5-0.1-1.dat	2	9	14	(0,0)	R-5	Optimal	459	459	1	34.8215	0
RE75-5-0.1-2.dat	2	9	14	(0,0)	R-5	Optimal	466	466	1	44.2404	0
RE75-5-0.1-3.dat	2	9	14	(0,0)	R-5	Optimal	463	463	1	30.9443	0
RE75-5-0.1-4.dat	2	9	14	(0,0)	R-5	Optimal	325	325	1	24.5707	0
RE75-5-0.1-5.dat	2	8	13	(0,0)	R-5	Optimal	519	519	1	22.5592	0
RE75-5-0.2-1.dat	2	7	12	(0,0)	R-7	Optimal	407	407	1	50.3077	0
RE75-5-0.2-2.dat	2	8	13	(0,0)	R-7	Optimal	404	404	1	72.2061	0
RE75-5-0.2-3.dat	2	8	13	(0,0)	R-7	Optimal	535	535	1	55.4831	0
RE75-5-0.2-4.dat	2	8	13	(0,0)	R-7	Optimal	400	400	1	20.9463	0
RE75-5-0.2-5.dat	2	7	12	(0,0)	R-7	Optimal	323	323	1	61.2893	0
